# Supplementary material for: Transcriptome Analysis Uncovers a Link Between Copper Metabolism, and Both Fungal Fitness and Antifungal Sensitivity in the Opportunistic Yeast Candida albicans
Source: Front Microbiol. 2020 May 19;11:935. doi: 10.3389/fmicb.2020.00935 (PMC7248230; doi:10.3389/fmicb.2020.00935)
Supplement: Supplementary file 5 [file Table_5.xlsx]

## Sheet: Table S5
Table S5
RNA-seq raw data of both C. albicans WT strain (under Cu excess and limitation) and mac1 mutant (under Cu limitation).

## Sheet: Data
ORF19_ID	ASSEMBLY22_ID	Gene	WT (+Cu) vs wt [log2(fold change)]	FDR	WT (+BCS) vs wt [log2(fold change)]	FDR	mac1 (+BCS) vs mac1 [log2(fold change)]	FDR
orf19.4212	C6_00470C_A	FET99	6.80044	0.00102343	0.0796657	0.999481	2.29343	0.0614991
orf19.7364	C3_05840W_A	C3_05840W_A	6.41475	0.066168	0.453153	0.999481	0.00479311	0.99937
orf19.2160	C6_04620C_A	NAG4	5.79067	0.0415353	0.107411	0.999481	0.379616	0.939754
orf19.355	C3_03570C_A	C3_03570C_A	5.64197	0.234769	-0.162936	0.999481	-0.640747	0.949854
orf19.7313	CR_09170C_A	SSU1	5.04066	0.0120206	1.51866	0.999481	-1.5176	0.377195
orf19.5604	C6_03170C_A	MDR1	5.01249	0.0700756	0.261354	0.999481	0.537074	0.903232
orf19.6520	C7_02000C_A	C7_02000C_A	4.87777	0.234577	-0.330416	0.999481	0.333793	0.968647
orf19.113	C6_01070C_A	CIP1	4.42444	0.208425	0.317815	0.999481	-0.490402	0.943703
orf19.3121	C4_06900W_A	GST1	4.00034	0.371239	0.606792	0.999481	-1.04407	0.898025
orf19.3107	C4_07020C_A	C4_07020C_A	3.91044	0.0526442	2.68184	0.999481	-0.607166	0.788703
orf19.6398	CR_08310C_A	CR_08310C_A	3.62848	0.208145	-0.959609	0.999481	1.55568	0.74042
orf19.2158	C6_04610C_A	NAG3	3.62261	0.0087882	0.381465	0.999481	0.209256	0.85729
orf19.6391	CR_08270W_A	CR_08270W_A	3.6012	0.129912	-1.03807	0.999481	1.47339	0.679407
orf19.1608	C3_02360C_A	C3_02360C_A	3.55401	0.127833	-0.0781956	0.999481	0.731966	0.841137
orf19.1363	C2_09880C_A	C2_09880C_A	3.5514	0.0137108	0.642555	0.999481	2.49118	0.0843546
orf19.4936.1	C1_13100W_A	C1_13100W_A	3.41798	0.0363465	3.57748	0.544657	-1.18983	0.412688
orf19.6249	C1_06610C_A	HAK1	3.4164	0.0390904	0.648802	0.999481	-0.684064	0.747558
orf19.3538	C2_05070W_A	FRE9	3.32895	0.0205441	0.551603	0.999481	5.24174	0.00221294
orf19.2369.1	CR_06950C_A	ATX1	3.31724	0.042719	0.0433374	0.999481	0.148073	0.952555
orf19.8278	C1_11410C_A	C1_11410C_A	3.30232	0.0150571	0.636199	0.999481	1.76945	0.174993
orf19.5216	C2_05960C_A	C2_05960C_A	3.30122	0.0141627	1.2678	0.999481	0.823267	0.43131
orf19.6311	CR_04820W_A	CR_04820W_A	3.26206	0.0762211	1.83938	0.999481	0.287409	0.897185
orf19.251	C3_02610C_A	GLX3	3.23913	0.0424443	0.597507	0.999481	0.301299	0.88423
orf19.6919	C7_01380W_A	C7_01380W_A	3.20976	0.0231759	0.213308	0.999481	-0.0384625	0.987051
orf19.6999	C3_05640W_A	C3_05640W_A	3.13784	0.104558	0.744353	0.999481	0.256447	0.938921
orf19.341	C3_03440C_A	C3_03440C_A	3.06606	0.0178542	0.466806	0.999481	0.451514	0.746665
orf19.4689	C4_01000C_A	PGA57	3.02613	0.00529132	1.38925	0.544657	0.296152	0.617545
orf19.3988	C5_04980W_A	C5_04980W_A	2.98072	0.215212	0.184764	0.999481	0.952222	0.78301
orf19.4773	C1_09150W_A	AOX2	2.87507	0.114201	4.06882	0.783911	-3.80106	0.138632
orf19.2735	C4_02640C_A	SEN2	2.84068	0.0199458	0.847865	0.999481	2.13151	0.0987352
orf19.3940.1	C5_04560C_A	CUP1	2.73693	0.00529132	-0.190167	0.999481	-0.841333	0.167141
orf19.5811	C2_02940W_A	MET1	2.6822	0.0788128	0.667897	0.999481	0.0853965	0.971857
orf19.6586	C7_01430C_A	C7_01430C_A	2.65655	0.0300461	1.13771	0.999481	0.517066	0.68118
orf19.1227	C1_07670W_A	ZCF4	2.64515	0.213963	0.0363902	0.999481	0.739025	0.820554
orf19.1415	C4_04320W_A	FRE10	2.62912	0.00592595	0.382499	0.999481	4.09981	6.9471e-05
orf19.1167	C1_11530C_A	C1_11530C_A	2.61091	0.136913	-0.117506	0.999481	0.344972	0.907074
orf19.1287	C5_04030W_A	C5_04030W_A	2.60897	0.0268231	0.154023	0.999481	1.2565	0.302491
orf19.3932.1	C5_04480C_A	C5_04480C_A	2.59534	0.356296	1.22651	0.999481	-0.649256	0.88471
orf19.5673	C4_00440C_A	OPT7	2.58777	0.10084	-1.488	0.999481	1.40682	0.571755
orf19.7314	CR_09180W_A	CDG1	2.5613	0.0531007	2.14033	0.999481	-2.59781	0.161768
orf19.3131	C4_06780C_A	OYE32	2.55696	0.26481	0.378147	0.999481	0.273066	0.945319
orf19.6864	C4_05250W_A	C4_05250W_A	2.54561	0.0175193	0.489146	0.999481	1.30553	0.212067
orf19.2462	C1_05870W_A	PRN3	2.54131	0.167431	-0.101015	0.999481	-0.769727	0.793365
tR(CCG)1	C1_02340C_A	tR(CCG)1	2.52119	0.218797	0.0192555	0.999481	0.499798	0.883298
orf19.5978	C3_05080W_A	C3_05080W_A	2.49781	0.112553	-0.0525946	0.999481	0.0500397	0.987271
orf19.7469	CR_00620C_A	ARG1	2.49732	0.148785	-0.157777	0.999481	-1.24626	0.669542
orf19.2738	C4_02610C_A	SUL2	2.46967	0.242376	0.131575	0.999481	0.951126	0.773331
orf19.2513	C3_01110C_A	C3_01110C_A	2.46654	0.016975	0.954934	0.999481	0.891155	0.321924
orf19.1763	C2_10180W_A	IFR1	2.46351	0.264658	0.259153	0.999481	-0.763308	0.836349
orf19.5645	C4_00200C_A	MET15	2.45962	0.0288592	-0.375789	0.999481	1.03715	0.380771
orf19.2197	C2_07840W_A	C2_07840W_A	2.4444	0.401496	-0.264111	0.999481	-0.535689	0.925635
orf19.2724	C4_02740W_A	C4_02740W_A	2.43335	0.0128285	0.558513	0.999481	0.924283	0.257257
orf19.720	CR_06460W_A	GST3	2.41476	0.285565	-0.0574414	0.999481	-0.525492	0.89835
orf19.5753	C6_03790C_A	HGT10	2.38246	0.0663411	1.33217	0.999481	0.0458575	0.980138
orf19.1430	C4_04190C_A	C4_04190C_A	2.37873	0.0897716	-0.325739	0.999481	2.58283	0.18187
orf19.851	C2_03690C_A	C2_03690C_A	2.35788	0.0113963	-0.175923	0.999481	1.03588	0.217934
orf19.2836	CR_02780W_A	CR_02780W_A	2.3296	0.312523	0.565062	0.999481	-0.0916279	0.983857
orf19.183	C2_04810W_A	HIS3	2.31951	0.016975	2.0653	0.369255	-0.68132	0.374697
orf19.1580	C2_02550C_A	C2_02550C_A	2.28414	0.0971734	0.379675	0.999481	-1.1119	0.567405
orf19.5926	C3_04660C_A	ARG11	2.28094	0.0115739	0.874728	0.999481	-0.254781	0.752836
orf19.5020	C1_13820C_A	C1_13820C_A	2.27891	0.0246898	0.48685	0.999481	1.34538	0.203956
orf19.5713	C6_03480W_A	YMX6	2.27005	0.0195852	0.648788	0.999481	1.19571	0.203956
orf19.5672	C4_00430W_A	MEP2	2.22864	0.0283734	0.687673	0.999481	-0.608564	0.600189
orf19.1362	C2_09890W_A	SMM1	2.22686	0.0117631	0.158242	0.999481	1.11851	0.179999
snR79	C4_02650C_A	C4_02650C_A	2.21145	0.0231343	1.33333	0.999481	0.505073	0.581056
RPR1	C2_08055W_A	RPR1	2.21073	0.313593	0.220096	0.999481	-0.168902	0.968647
orf19.7029	C7_00870W_A	C7_00870W_A	2.20649	0.0540593	1.12767	0.999481	0.389823	0.777115
orf19.6873.1	C2_05620W_A	KTI11	2.20186	0.0131835	-0.104057	0.999481	0.886253	0.287972
orf19.740	C4_05110C_A	HAP41	2.18707	0.022136	0.928486	0.999481	-0.621129	0.515958
snR41b	C1_12980W_A	C1_12980W_A	2.16992	0.0237393	1.20803	0.999481	1.5126	0.143106
orf19.2285	C2_07280W_A	C2_07280W_A	2.15245	0.364079	-0.463461	0.999481	-0.687415	0.878272
orf19.2202	C2_07790C_A	C2_07790C_A	2.12728	0.0424443	0.334746	0.999481	-0.388852	0.781847
orf19.718	CR_06480C_A	RRN11	2.12598	0.0406839	0.0428865	0.999481	1.57295	0.202427
orf19.7411	C3_06220C_A	OAC1	2.10162	0.0115739	0.964975	0.999481	0.227694	0.743615
orf19.3470	C6_02290C_A	C6_02290C_A	2.09774	0.0113963	0.684303	0.999481	1.05932	0.144072
orf19.7372	C3_05920W_A	MRR1	2.0976	0.0174625	-0.0192349	0.999481	1.25976	0.174993
tP(UGG)2	C2_09200W_A	tP(UGG)2	2.08257	0.438067	-0.292281	0.999481	0.816754	0.853825
orf19.3204	C5_01710C_A	C5_01710C_A	2.05242	0.0183297	0.180363	0.999481	1.27311	0.175403
orf19.2344	C1_10740C_A	ASR1	2.05186	0.0732854	-0.0710749	0.999481	1.34166	0.331121
orf19.5206	C2_05830C_A	C2_05830C_A	2.04623	0.0205186	0.0201192	0.999481	1.46218	0.152533
orf19.780	C1_04660W_A	DUR1,2	2.03671	0.0183297	0.67145	0.999481	0.233393	0.7873
orf19.6248	C1_06620C_A	C1_06620C_A	2.02282	0.0712037	0.869281	0.999481	1.64339	0.205946
orf19.5517	C6_02480W_A	C6_02480W_A	2.01914	0.0482412	0.45864	0.999481	0.935073	0.410427
orf19.5220	C1_12440W_A	C1_12440W_A	2.0083	0.0155292	0.10115	0.999481	0.910136	0.254339
orf19.4895	C1_10250C_A	C1_10250C_A	2.00766	0.0115739	0.941285	0.999481	0.889505	0.183496
orf19.3923	C5_04370C_A	PGA37	2.00233	0.220303	0.829692	0.999481	-1.19216	0.609318
orf19.2244	C2_06890C_A	C2_06890C_A	1.99656	0.105705	0.199188	0.999481	-0.264543	0.885362
orf19.7666	CR_10770W_A	CR_10770W_A	1.97403	0.215614	0.0807198	0.999481	-0.887236	0.730456
orf19.3665	C1_02080W_A	SET6	1.95497	0.0152416	-0.00614868	0.999481	1.18421	0.158646
orf19.2882	C4_06530C_A	XUT1	1.95454	0.0176613	0.693684	0.999481	0.0860763	0.9305
orf19.2356	CR_07060C_A	CRZ2	1.93625	0.0473979	-0.498422	0.999481	1.07169	0.352973
orf19.23	C2_06460W_A	RTA3	1.93619	0.00691071	0.309142	0.999481	1.32499	0.0307686
snR54	C2_06400C_A	C2_06400C_A	1.93593	0.0183297	0.559218	0.999481	0.238801	0.786824
orf19.3863	CR_06100C_A	CR_06100C_A	1.92904	0.146242	0.703443	0.999481	-0.250188	0.903232
orf19.1237	C4_05560C_A	ARO9	1.92348	0.171948	0.335773	0.999481	0.645793	0.733538
orf19.4630	C4_01550C_A	CPA1	1.91547	0.101586	-0.0371061	0.999481	-1.04911	0.551581
orf19.5915	C3_04570C_A	DUR35	1.91366	0.155533	0.628971	0.999481	1.25275	0.43131
orf19.5905	C3_04510W_A	C3_04510W_A	1.9131	0.0284825	0.430712	0.999481	0.984789	0.26992
orf19.6416	CR_08470W_A	CR_08470W_A	1.91092	0.0205186	0.312922	0.999481	1.3491	0.143106
orf19.3221	CR_01330W_A	CPA2	1.90031	0.0152416	0.182261	0.999481	-0.321662	0.678694
orf19.432	C1_05330C_A	C1_05330C_A	1.89597	0.0283678	0.580326	0.999481	0.653903	0.44699
tN(GUU)1	C1_05580W_A	tN(GUU)1	1.89385	0.0940704	0.82151	0.999481	0.276827	0.86093
orf19.3874	CR_06230W_A	CR_06230W_A	1.88958	0.0196594	0.266618	0.999481	0.694704	0.371944
orf19.6577	C7_01520W_A	FLU1	1.87871	0.0115739	0.508282	0.999481	0.465842	0.430615
orf19.4980	C1_13480W_A	HSP70	1.87775	0.128336	0.21438	0.999481	0.229123	0.901757
orf19.6950	C3_03690W_A	C3_03690W_A	1.87506	0.0354342	0.685947	0.999481	0.356349	0.728303
orf19.6976	C3_05380W_A	C3_05380W_A	1.87124	0.0705081	0.401448	0.999481	1.55992	0.204168
orf19.1830	C1_10580C_A	C1_10580C_A	1.85436	0.0156165	0.509798	0.999481	0.984573	0.187502
orf19.558	CR_05220C_A	GUT1	1.84616	0.00949157	1.17085	0.454657	-0.134596	0.814598
orf19.2460	C1_05890W_A	C1_05890W_A	1.82797	0.0789831	1.4607	0.999481	-1.21223	0.336574
orf19.5732	C6_03640W_A	NOG2	1.82794	0.0117631	0.287715	0.999481	0.846824	0.198118
orf19.4962	C1_13360C_A	RMP1	1.82695	0.0332833	0.120033	0.999481	1.38315	0.182897
orf19.813	C2_04080W_A	C2_04080W_A	1.82397	0.0176076	0.509953	0.999481	0.459767	0.525546
orf19.5010	C1_13730C_A	DIM1	1.81908	0.0122399	0.124279	0.999481	0.868875	0.195144
orf19.4377	CR_03790C_A	KRE1	1.81875	0.0288675	0.57572	0.999481	0.375112	0.674891
orf19.4355	CR_03840C_A	CR_03840C_A	1.81623	0.029414	0.423034	0.999481	0.744878	0.383533
orf19.2547	CR_01600C_A	CR_01600C_A	1.80943	0.0120197	0.481901	0.999481	0.74743	0.221111
orf19.3234	CR_01200W_A	OYE22	1.80532	0.438609	0.189664	0.999481	-1.08583	0.779858
orf19.4160	C4_00810C_A	C4_00810C_A	1.80373	0.0183297	0.0363964	0.999481	1.69494	0.0596306
orf19.2674	C4_03160C_A	C4_03160C_A	1.80152	0.0638239	0.0625006	0.999481	-0.0569272	0.972847
orf19.6723	C3_07650C_A	C3_07650C_A	1.80056	0.0300949	0.34022	0.999481	1.20835	0.196968
orf19.5741	C6_03700W_A	ALS1	1.79123	0.41357	2.75281	0.999481	-0.116673	0.972847
orf19.3749	CR_02220C_A	OPT3	1.79037	0.0183297	-0.105609	0.999481	-1.24621	0.185842
orf19.4096	C2_09350W_A	TAZ1	1.78195	0.0115739	1.12222	0.694768	0.756649	0.176184
orf19.1771	C2_10100W_A	CWC22	1.76509	0.0432693	0.307088	0.999481	0.784112	0.410675
orf19.5826	C2_02790C_A	C2_02790C_A	1.75976	0.0794778	1.33559	0.999481	-0.333252	0.788605
tV(AAC)4	CR_05850W_A	tV(AAC)4	1.75897	0.487127	1.37389	0.999481	-0.93708	0.797442
orf19.4179	C4_00640W_A	C4_00640W_A	1.75788	0.186647	0.0302216	0.999481	0.582726	0.762888
orf19.5025	C1_13870W_A	MET3	1.75244	0.252538	-1.4214	0.999481	2.31502	0.278635
orf19.1930	C5_01380W_A	CFL5	1.74996	0.310608	3.29461	0.999481	9.92218	0.000151342
tY(GUA)1	C1_11820W_A	tY(GUA)1	1.74947	0.555978	-0.545353	0.999481	-0.284192	0.962938
orf19.535	CR_04440C_A	RBR1	1.74703	0.0439537	1.17621	0.999481	-1.84569	0.132957
orf19.467	CR_03890W_A	WOR3	1.74372	0.0250002	1.22758	0.999481	-0.548561	0.469363
orf19.3926	C5_04400W_A	RNY11	1.74284	0.0307085	0.686056	0.999481	-0.294537	0.759341
orf19.4783	C1_09240C_A	C1_09240C_A	1.7339	0.069028	-0.664616	0.999481	-0.29041	0.855285
orf19.3088	C4_07150W_A	C4_07150W_A	1.71215	0.0137108	-0.0103372	0.999481	0.723528	0.261776
orf19.7657	CR_10690W_A	POP3	1.70181	0.0504055	0.109309	0.999481	0.874617	0.383533
orf19.6918	C7_01370W_A	C7_01370W_A	1.70092	0.0113963	0.437854	0.999481	0.882843	0.141966
orf19.5431	C3_00360W_A	C3_00360W_A	1.70005	0.030363	0.491889	0.999481	-0.153624	0.878131
orf19.2467	C1_05840W_A	PRN1	1.69722	0.282255	0.133805	0.999481	-0.678487	0.786837
orf19.2604	CR_02030C_A	CR_02030C_A	1.69098	0.0205186	0.0904894	0.999481	1.05722	0.186296
orf19.5610	C6_03230W_A	ARG3	1.69063	0.162161	0.267165	0.999481	-1.19429	0.506035
orf19.6686	C7_03540C_A	ENP2	1.69033	0.0148232	0.188521	0.999481	0.928659	0.174993
orf19.2693	C4_02990C_A	GST2	1.68959	0.129603	-0.118276	0.999481	0.803122	0.577278
orf19.4818	C1_09540W_A	C1_09540W_A	1.68892	0.0082699	-0.0782259	0.999481	0.530047	0.278863
orf19.4273	C5_02590C_A	C5_02590C_A	1.68712	0.0162798	0.476536	0.999481	1.71646	0.0284668
orf19.6499	C7_02160W_A	C7_02160W_A	1.68661	0.0128285	0.220636	0.999481	0.764422	0.213437
orf19.1932	C5_01360W_A	CFL4	1.68267	0.046671	-0.803576	0.999481	10.0602	3.82341e-06
orf19.3626	C2_08530C_A	C2_08530C_A	1.67857	0.0425429	-0.0432977	0.999481	1.33035	0.192829
orf19.4328	C5_03020W_A	CCC2	1.67618	0.00691071	0.125842	0.999481	3.83037	8.35767e-06
orf19.6402	CR_08340W_A	CYS3	1.67424	0.030363	-0.597052	0.999481	1.07039	0.22084
orf19.4775	C1_09170W_A	CTA8	1.67386	0.163251	0.62953	0.999481	1.32326	0.354944
orf19.217	C2_08890W_A	C2_08890W_A	1.67208	0.0682407	-1.24315	0.999481	2.0398	0.147669
orf19.4886	C1_10170W_A	C1_10170W_A	1.67129	0.2063	-0.506317	0.999481	0.25205	0.915561
orf19.3275	CR_00810W_A	CR_00810W_A	1.66806	0.0232546	0.156913	0.999481	0.732112	0.33779
orf19.1766	C2_10150W_A	C2_10150W_A	1.66463	0.180098	-0.162146	0.999481	0.0315384	0.990033
orf19.3425	C6_01620W_A	C6_01620W_A	1.6595	0.0264202	0.574314	0.999481	0.0391565	0.969653
orf19.3501	C6_02090C_A	C6_02090C_A	1.65007	0.0065211	0.340671	0.999481	0.464723	0.224816
orf19.532	CR_04420C_A	RBR2	1.64489	0.0635192	-0.0349808	0.999481	-0.537481	0.665977
orf19.3127	C4_06820C_A	CZF1	1.64476	0.0468422	0.256584	0.999481	0.916494	0.323356
orf19.4076	C2_09140C_A	MET10	1.64344	0.186202	-0.174824	0.999481	0.103514	0.962267
orf19.356	C3_03580C_A	GTT13	1.64342	0.20613	0.153478	0.999481	-0.288246	0.892685
orf19.473	CR_03920C_A	TPO4	1.64305	0.0304095	0.00500284	0.999597	0.285597	0.751365
orf19.5067	C1_07960W_A	C1_07960W_A	1.63727	0.0238167	0.221894	0.999481	1.08255	0.18187
orf19.5959	C3_04900W_A	NOP14	1.63485	0.0155053	0.240801	0.999481	0.804446	0.212658
orf19.4788	C1_09290C_A	ARG5,6	1.62067	0.0321353	0.164876	0.999481	-1.16386	0.220976
orf19.1639	C3_02070C_A	C3_02070C_A	1.61856	0.126527	0.0241012	0.999481	0.0612842	0.974003
orf19.154	C2_04700C_A	C2_04700C_A	1.61726	0.0369238	-0.274644	0.999481	1.32354	0.183343
orf19.1397	C2_09570C_A	C2_09570C_A	1.60887	0.00968125	0.841798	0.860186	0.279225	0.526503
orf19.344	C3_03460C_A	C3_03460C_A	1.60443	0.0425429	1.19532	0.999481	1.22174	0.156451
snR52	C3_07510C_A	SNR52	1.60111	0.306461	-0.24664	0.999481	0.683894	0.775384
orf19.6052	C1_00560W_A	CNS1	1.59734	0.0205186	0.045978	0.999481	0.965273	0.198099
orf19.4125	C2_04860W_A	PZF1	1.59275	0.0192929	0.225856	0.999481	0.998452	0.174707
orf19.5933	C3_04730C_A	C3_04730C_A	1.5837	0.325397	0.221139	0.999481	-1.85875	0.45543
orf19.431	C1_05340C_A	ZCF2	1.58095	0.0388444	1.24629	0.999481	-0.714218	0.381594
orf19.4143	C5_01480W_A	FYV5	1.58017	0.0288592	0.0863995	0.999481	0.867716	0.268928
orf19.4393	CR_03500W_A	CIT1	1.57799	0.0388444	1.27718	0.999481	-0.382316	0.665883
orf19.4964	C1_13380W_A	C1_13380W_A	1.57193	0.0227118	0.353116	0.999481	0.950933	0.198118
orf19.5566	C6_02900C_A	C6_02900C_A	1.57126	0.0238999	-0.025326	0.999481	0.835218	0.260802
orf19.3970	C5_04840C_A	C5_04840C_A	1.56885	0.0635635	0.358821	0.999481	0.750689	0.434447
orf19.107	C6_01040C_A	C6_01040C_A	1.56496	0.0210933	-0.0796353	0.999481	1.0647	0.171511
orf19.125	C6_01180C_A	EBP1	1.56491	0.310608	-0.70606	0.999481	1.85823	0.362806
orf19.7088	C7_00330C_A	C7_00330C_A	1.56106	0.0249381	-0.118196	0.999481	0.789641	0.291386
orf19.2564	CR_01710W_A	CR_01710W_A	1.56104	0.0288592	0.158439	0.999481	0.803073	0.289676
orf19.1566	C2_02430W_A	UTP21	1.56003	0.0147047	0.0464077	0.999481	0.939556	0.152533
orf19.4563	C4_02260C_A	C4_02260C_A	1.55686	0.0495734	-0.174842	0.999481	1.15339	0.228725
orf19.2018	C2_01060C_A	C2_01060C_A	1.55645	0.0380818	0.271657	0.999481	0.916093	0.265549
orf19.2247	C2_06930C_A	C2_06930C_A	1.54743	0.26824	0.89255	0.999481	-0.326184	0.878131
tW(CCA)2	C3_06840C_A	tW(CCA)2	1.54426	0.245182	0.800199	0.999481	-0.368282	0.854007
orf19.3643	C6_00810C_A	C6_00810C_A	1.54278	0.204958	0.526975	0.999481	-0.763438	0.655615
orf19.2018.2	C2_01050W_A	C2_01050W_A	1.54219	0.227944	0.329587	0.999481	0.201051	0.925424
tL(AAG)2	C1_07310C_A	tL(AAG)2	1.5277	0.446131	0.277461	0.999481	-0.916021	0.779609
orf19.6091	C1_00150C_A	RIM8	1.5257	0.0087882	-0.369514	0.999481	0.26843	0.544592
orf19.5050	C1_07800W_A	MTO1	1.52221	0.013274	0.553635	0.999481	0.691369	0.201263
orf19.3708	CR_07800W_A	SAP2	1.52136	0.058528	-0.272166	0.999481	0.180907	0.882532
orf19.5356	C2_10740C_A	C2_10740C_A	1.51539	0.0162322	0.0332107	0.999481	0.585975	0.317365
orf19.2330	C1_10880W_A	C1_10880W_A	1.5113	0.0165641	-0.0309664	0.999481	0.749922	0.220989
orf19.5207	C2_05840W_A	C2_05840W_A	1.50548	0.0301103	-0.034637	0.999481	0.865236	0.256407
snR24	C7_01260W_A	C7_01260W_A	1.49822	0.0425429	0.308088	0.999481	1.0937	0.203956
orf19.1673	C3_01710C_A	PPT1	1.49736	0.00810254	0.404378	0.999481	0.63411	0.160103
orf19.1499	C2_01890W_A	CTF1	1.48535	0.00691071	0.793516	0.497281	0.34385	0.334472
orf19.882	C2_03390C_A	HSP78	1.48478	0.188581	0.34643	0.999481	0.176524	0.92207
orf19.1091	C6_04330W_A	NOP8	1.48282	0.0205441	0.267753	0.999481	0.774461	0.234442
orf19.97	C6_00960W_A	CAN1	1.48117	0.212059	0.947651	0.999481	0.727758	0.606352
orf19.3433	C6_01510W_A	OYE23	1.47963	0.393564	-0.320256	0.999481	0.182462	0.954245
orf19.2830	CR_02710W_A	RRP9	1.47739	0.0156165	-0.0451361	0.999481	0.857103	0.174896
orf19.1029	C1_03800W_A	RPP1	1.46136	0.01908	0.449828	0.999481	0.771165	0.21026
orf19.4106	C2_06120C_A	C2_06120C_A	1.45958	0.0183297	0.270987	0.999481	0.678351	0.259645
orf19.4409	C4_05980C_A	C4_05980C_A	1.45958	0.00691071	0.525221	0.999481	0.418293	0.254339
orf19.414	C1_05500W_A	RSM22	1.45908	0.0102512	0.277391	0.999481	0.964214	0.0708365
orf19.2934	C1_02450C_A	C1_02450C_A	1.45578	0.0178542	0.190585	0.999481	0.727593	0.226825
tI(UAU)1	C1_10900C_A	tI(UAU)1	1.45502	0.266464	1.05842	0.999481	-0.298549	0.878786
orf19.2090	C2_00410C_A	C2_00410C_A	1.45165	0.0183297	-0.116566	0.999481	0.937554	0.168351
orf19.2231	C2_06800C_A	C2_06800C_A	1.44952	0.0297305	0.376018	0.999481	0.751485	0.277012
orf19.6829	C3_06740W_A	C3_06740W_A	1.4469	0.0117631	0.440152	0.999481	0.43359	0.352545
orf19.4634	C4_01500W_A	C4_01500W_A	1.44451	0.0177115	0.0536429	0.999481	0.965478	0.144781
orf19.5567	C6_02910W_A	POP4	1.44388	0.0478218	-0.146376	0.999481	0.665622	0.442424
orf19.4600	C4_01930C_A	C4_01930C_A	1.43977	0.0199458	0.993861	0.964255	-0.446193	0.434447
orf19.3466	C6_02250W_A	C6_02250W_A	1.43849	0.0635084	0.047227	0.999481	0.821248	0.373656
orf19.5678	C4_00490W_A	C4_00490W_A	1.43475	0.0391085	-0.207162	0.999481	0.643325	0.429983
orf19.2312	C1_11020W_A	C1_11020W_A	1.43371	0.0492613	-0.00836784	0.999481	0.554704	0.51951
orf19.3337	C1_01510W_A	C1_01510W_A	1.4326	0.106826	0.936851	0.999481	1.10201	0.257591
orf19.4590	C4_02030W_A	RFX2	1.43096	0.0530222	0.718225	0.999481	-0.358165	0.691458
orf19.3756	C1_12600C_A	CHR1	1.42763	0.0318836	-0.058608	0.999481	0.985488	0.202427
orf19.5500	C2_06360C_A	MAK16	1.42564	0.0175193	0.203146	0.999481	0.707981	0.228045
orf19.124	C6_01170W_A	CIC1	1.42544	0.0152416	0.496668	0.999481	0.436746	0.393469
orf19.2457	C1_05920W_A	C1_05920W_A	1.42477	0.163251	1.35879	0.999481	-1.08283	0.384391
orf19.3753	CR_02190C_A	SEF1	1.41971	0.0120552	0.0834208	0.999481	2.76963	0.000215904
orf19.6021	C1_00850W_A	IHD2	1.41915	0.041965	0.534256	0.999481	0.711642	0.338225
orf19.769	C1_04750W_A	IFE1	1.41503	0.0990488	0.0669798	0.999481	0.846691	0.413929
orf19.3759	C1_12570C_A	C1_12570C_A	1.41329	0.0241096	0.0280785	0.999481	0.725425	0.268142
orf19.5049	C1_07790C_A	C1_07790C_A	1.41258	0.0195035	0.319251	0.999481	0.558548	0.336574
orf19.4863	C1_09970C_A	PDC2	1.41241	0.0183297	-0.0138245	0.999481	0.500727	0.38267
orf19.4391	CR_03480W_A	CR_03480W_A	1.4107	0.360199	2.04907	0.999481	0.396858	0.829676
orf19.1783	C2_09990C_A	YOR1	1.41051	0.0318665	0.053421	0.999481	-0.133196	0.874358
orf19.444	C1_05220C_A	C1_05220C_A	1.40364	0.0440125	-0.189335	0.999481	1.26604	0.167587
orf19.2715	C4_02800W_A	RPC53	1.40335	0.0183297	0.0721587	0.999481	0.60019	0.299669
orf19.3627	C2_08510W_A	C2_08510W_A	1.40105	0.0231343	0.798594	0.999481	-0.489167	0.430615
orf19.6484	C7_02280W_A	C7_02280W_A	1.39935	0.354788	-0.178295	0.999481	-0.222449	0.939754
orf19.4219	C5_02120C_A	RIX7	1.39921	0.016975	0.0544893	0.999481	0.564591	0.302491
orf19.7387	C3_06060W_A	ELP3	1.39708	0.013386	0.429535	0.999481	0.317658	0.509956
orf19.6477	C7_02340C_A	C7_02340C_A	1.39557	0.0370082	-0.0648433	0.999481	0.980329	0.212067
orf19.1721	C3_01300C_A	NCE103	1.39429	0.0455475	0.245646	0.999481	0.257441	0.766103
orf19.1966	C5_01060C_A	BUD23	1.39233	0.0131835	0.380681	0.999481	0.554764	0.251737
orf19.3986	C5_04970C_A	PPR1	1.3913	0.0196594	0.658033	0.999481	0.0959232	0.885362
orf19.6028	C1_00780C_A	HGC1	1.39126	0.121999	1.26095	0.999481	-1.52377	0.212209
orf19.3287	CR_00680W_A	BUD22	1.3898	0.0196594	0.155338	0.999481	0.657427	0.265549
orf19.6845	C1_04510W_A	C1_04510W_A	1.37592	0.0183297	0.264318	0.999481	0.762481	0.200045
orf19.1797	C4_05400C_A	C4_05400C_A	1.37365	0.0657985	0.878993	0.999481	0.145318	0.880088
orf19.700	CR_06660W_A	SEO1	1.37018	0.303606	-0.188417	0.999481	0.830173	0.655615
orf19.3831	C4_04520W_A	C4_04520W_A	1.36847	0.0226117	0.0769275	0.999481	0.874558	0.190788
orf19.1569	C2_02450C_A	UTP22	1.36808	0.0137108	0.0246797	0.999481	0.881144	0.127719
orf19.2384	CR_03380W_A	MTG1	1.36801	0.0216501	0.137312	0.999481	1.09617	0.116666
orf19.2179	C2_08050C_A	SIT1	1.3665	0.0168745	1.22078	0.362127	3.30964	3.28142e-05
orf19.2287	C2_07300C_A	RPA12	1.36418	0.0214232	0.0563804	0.999481	0.653137	0.280399
orf19.3327	C1_01380C_A	TRM2	1.36318	0.0268231	-0.0256596	0.999481	0.612493	0.345619
orf19.5498	C2_06340W_A	EFH1	1.36183	0.101259	0.525945	0.999481	-0.720196	0.504178
SCR1	CR_04275W_A	SCR1	1.36172	0.211788	-0.226	0.999481	0.374304	0.823929
orf19.3978	C5_04910W_A	C5_04910W_A	1.36136	0.0178542	0.339118	0.999481	0.545208	0.309422
orf19.4122	C2_05980C_A	C2_05980C_A	1.36104	0.0152416	0.495023	0.999481	0.00144005	0.998085
orf19.2125	C6_04420W_A	C6_04420W_A	1.35996	0.0323516	-0.247198	0.999481	0.390008	0.597063
orf19.1404	C2_09500W_A	C2_09500W_A	1.35396	0.0259315	-0.0521734	0.999481	0.784004	0.233513
orf19.6298	C5_01600C_A	SPB4	1.35219	0.0183297	0.155444	0.999481	0.728797	0.210137
orf19.4097	C2_09360W_A	C2_09360W_A	1.34135	0.0131835	0.371134	0.999481	0.670469	0.183496
orf19.1035	C1_03740W_A	WAR1	1.34095	0.0504234	0.578455	0.999481	-0.248947	0.771872
snR8c	C7_02190W_A	C7_02190W_A	1.34069	0.0437696	0.573252	0.999481	0.411462	0.567405
orf19.5805	C2_02980C_A	DLD1	1.33958	0.00356734	0.0472958	0.999481	0.829142	0.00708022
orf19.2688	C4_03030C_A	NAN1	1.33914	0.0264536	-0.0632673	0.999481	0.913415	0.190788
orf19.5250	C1_12140W_A	C1_12140W_A	1.3378	0.197778	-0.0189761	0.999481	-0.564812	0.72504
orf19.716	CR_06500C_A	CR_06500C_A	1.33699	0.076905	1.32334	0.999481	-0.221244	0.80344
orf19.5704	C6_03440W_A	C6_03440W_A	1.33673	0.024159	0.16073	0.999481	1.41741	0.0549367
orf19.2038	C2_00860C_A	C2_00860C_A	1.33617	0.0804744	0.312232	0.999481	0.0870381	0.944291
tP(AGG)1	C1_06950C_A	tP(AGG)1	1.33525	0.518818	1.128	0.999481	-1.05951	0.720236
orf19.275	C3_02840W_A	C3_02840W_A	1.33249	0.0453192	-0.0427244	0.999481	1.05482	0.200731
orf19.6073	C1_00350C_A	HMX1	1.33156	0.0493899	0.0762363	0.999481	1.15881	0.185334
tP(UGG)3	C1_00720W_A	tP(UGG)3	1.3293	0.262485	1.45202	0.999481	0.423688	0.775384
orf19.773	C1_04710C_A	C1_04710C_A	1.32846	0.0379115	0.0835826	0.999481	0.845028	0.241576
orf19.5759	C6_03840C_A	SNQ2	1.32513	0.00691071	1.37057	0.00814216	0.158478	0.60727
orf19.2899	C4_06360C_A	C4_06360C_A	1.3223	0.203939	-0.154936	0.999481	0.14192	0.940192
orf19.4574	C4_02170C_A	C4_02170C_A	1.32081	0.0142537	0.128306	0.999481	0.510791	0.293707
orf19.6356	C1_12670C_A	C1_12670C_A	1.31968	0.0275299	0.141584	0.999481	0.797749	0.220895
orf19.7197	C7_03850W_A	C7_03850W_A	1.31711	0.0183297	0.187611	0.999481	0.752217	0.198118
orf19.4474	C1_03990W_A	C1_03990W_A	1.31282	0.175104	0.0176259	0.999481	-0.0597387	0.972142
orf19.3130	C4_06790W_A	C4_06790W_A	1.31177	0.0183297	-0.0727737	0.999481	0.596727	0.276287
orf19.6652	CR_05630W_A	DBP8	1.31099	0.0155292	0.210558	0.999481	0.525064	0.285586
orf19.1708	C3_01430W_A	C3_01430W_A	1.31091	0.0288592	0.117257	0.999481	0.769668	0.235845
orf19.5507	C7_03700C_A	ENP1	1.30757	0.0207701	0.140219	0.999481	0.721444	0.223399
orf19.6518	C7_02010C_A	C7_02010C_A	1.30735	0.421701	0.295366	0.999481	-1.08959	0.657912
orf19.6556	C7_01680C_A	C7_01680C_A	1.30713	0.0994837	0.313622	0.999481	1.34013	0.185334
orf19.6175	C3_07800C_A	C3_07800C_A	1.3059	0.0210495	0.0465389	0.999481	0.710347	0.228725
orf19.2723	C4_02750W_A	HIT1	1.30581	0.0425429	0.221618	0.999481	0.951459	0.205673
orf19.3660	C6_00690W_A	C6_00690W_A	1.30145	0.0120197	0.411678	0.999481	0.573643	0.202427
orf19.3770	C4_05070C_A	ARG8	1.30021	0.221168	0.0133797	0.999481	-1.42438	0.38897
orf19.6805	C3_06950W_A	C3_06950W_A	1.2995	0.0882516	0.594285	0.999481	0.0853175	0.941017
orf19.3876	CR_06240C_A	ZCF19	1.29794	0.0199458	0.345013	0.999481	0.535318	0.323405
orf19.5596	C6_03110C_A	C6_03110C_A	1.29193	0.0332597	-0.146454	0.999481	0.727664	0.295515
orf19.5814.1	C2_02910W_A	C2_02910W_A	1.28776	0.076905	0.609926	0.999481	0.475513	0.566578
orf19.6431	CR_08580C_A	CR_08580C_A	1.28732	0.0379557	0.00540139	0.999481	0.787599	0.265165
orf19.5430	C3_00370C_A	BUD21	1.28466	0.0284398	-0.0764435	0.999481	0.818347	0.214995
orf19.3478	C6_02360W_A	NIP7	1.2843	0.0183297	0.0527066	0.999481	0.687171	0.215016
orf19.721	CR_06450W_A	CR_06450W_A	1.28339	0.0283073	0.255393	0.999481	0.679601	0.262948
orf19.494	CR_04110W_A	CR_04110W_A	1.28287	0.0338756	0.137506	0.999481	0.568498	0.381053
orf19.2859	CR_02980C_A	SRP40	1.2828	0.016975	0.404917	0.999481	0.169384	0.754895
orf19.7371	C3_05910W_A	ZCF35	1.27976	0.0195852	0.0812211	0.999481	0.680626	0.224816
orf19.3393	C6_01890C_A	C6_01890C_A	1.27863	0.0169393	-0.00262807	0.999597	0.599463	0.24648
orf19.4394	CR_03510W_A	CR_03510W_A	1.27542	0.253203	0.435037	0.999481	-0.864553	0.577824
orf19.2752	C4_02500C_A	ADR1	1.27424	0.0082699	0.73229	0.511425	0.373958	0.255702
orf19.4765	C1_09080C_A	PGA6	1.26362	0.0152503	-0.0546918	0.999481	0.551134	0.254339
orf19.171	CR_02530W_A	DBP2	1.26352	0.010586	0.355211	0.999481	0.699276	0.128249
orf19.829	C2_03940C_A	SCH9	1.25889	0.00691071	0.191501	0.999481	0.812797	0.0307686
orf19.1902	C2_07340W_A	NOC4	1.25841	0.0207893	-0.00711549	0.999481	0.822687	0.181684
orf19.7546	CR_09740W_A	CR_09740W_A	1.25564	0.0177115	0.185571	0.999481	0.615562	0.233513
orf19.416	C1_05480C_A	C1_05480C_A	1.25545	0.155743	0.440976	0.999481	-0.197422	0.883298
orf19.4568	C4_02220C_A	ZCF25	1.25086	0.0739156	-0.248459	0.999481	0.283872	0.775384
orf19.3150	C2_06720W_A	GRE2	1.25048	0.421075	0.157439	0.999481	-0.435204	0.86093
orf19.6532	C7_01880C_A	C7_01880C_A	1.25006	0.0391598	0.909507	0.999481	-0.316364	0.628032
orf19.4365	CR_03660C_A	CR_03660C_A	1.24935	0.016975	0.192521	0.999481	0.791134	0.151855
orf19.1113	C5_03810C_A	C5_03810C_A	1.24909	0.315633	-0.516835	0.999481	1.33887	0.437999
orf19.3089	C4_07140W_A	C4_07140W_A	1.24561	0.0207701	0.468405	0.999481	0.444992	0.392842
orf19.5070	C1_07990C_A	C1_07990C_A	1.24482	0.0424084	0.507896	0.999481	0.190137	0.791501
orf19.6917	C7_01360C_A	C7_01360C_A	1.24335	0.0380818	-0.220675	0.999481	0.923619	0.210432
orf19.1923	C2_00030W_A	RRN3	1.23846	0.0618562	-0.134177	0.999481	0.682796	0.381785
orf19.7279.1	CR_08830W_A	CR_08830W_A	1.23807	0.295805	3.25601	0.362127	-1.51697	0.234442
orf19.515	CR_04270C_A	CR_04270C_A	1.23742	0.0716384	-0.32747	0.999481	0.84904	0.334262
orf19.4133	C5_01430C_A	C5_01430C_A	1.23205	0.0176457	-0.0260843	0.999481	0.490692	0.328008
orf19.4784	C1_09250W_A	CRP1	1.22873	0.171348	-0.937632	0.999481	-0.4632	0.698514
orf19.5012	C1_13750C_A	C1_13750C_A	1.22212	0.0175052	0.5817	0.999481	0.43009	0.348399
snR87	C1_13040C_A	C1_13040C_A	1.21945	0.12733	0.542989	0.999481	1.34198	0.185533
orf19.5424	C3_00410C_A	C3_00410C_A	1.21688	0.266117	1.05713	0.999481	-0.562937	0.699538
orf19.3710	CR_07810W_A	YHB5	1.21671	0.0440125	0.649991	0.999481	-0.058813	0.945319
orf19.2236	C2_06830C_A	FHL1	1.21562	0.0654281	0.103287	0.999481	0.723459	0.352545
orf19.6955	C3_03650W_A	HBR3	1.21525	0.022136	0.292997	0.999481	0.430019	0.417608
orf19.6920	C7_01390W_A	C7_01390W_A	1.21141	0.0183297	0.721495	0.999481	-0.489523	0.321462
orf19.2044	C2_00800C_A	PGA27	1.21039	0.0195852	0.151244	0.999481	0.806548	0.161768
orf19.823	C2_04000C_A	C2_04000C_A	1.20854	0.46892	-0.572818	0.999481	-0.770717	0.784746
orf19.4940	C1_13130C_A	C1_13130C_A	1.20795	0.0456443	0.331221	0.999481	1.1561	0.144072
orf19.7412	C3_06210C_A	MUB1	1.20749	0.0183297	0.0788425	0.999481	0.434635	0.375868
orf19.2258	C2_07020C_A	C2_07020C_A	1.20541	0.0240898	0.128654	0.999481	0.178979	0.775384
orf19.3370	C4_03440C_A	DOT4	1.20515	0.0156554	0.185458	0.999481	0.525846	0.257027
orf19.3049	C1_03470C_A	C1_03470C_A	1.19985	0.231665	0.689851	0.999481	-0.303276	0.834068
orf19.4716	C4_06120W_A	GDH3	1.19984	0.0507545	-0.0201555	0.999481	0.849794	0.249501
orf19.7672	CR_10810C_A	CR_10810C_A	1.19894	0.0238737	0.0803827	0.999481	0.242496	0.671047
orf19.7219	C1_14130W_A	FTR1	1.19878	0.016975	-1.21658	0.260644	5.94179	3.0866e-06
orf19.801	C2_04200W_A	TBF1	1.19877	0.0626084	-0.00226287	0.99972	0.949075	0.227569
orf19.6886	C2_05750W_A	C2_05750W_A	1.19748	0.0227118	0.337032	0.999481	0.526037	0.327706
orf19.1886	C2_07450C_A	RCL1	1.19666	0.0210097	-0.174877	0.999481	0.629548	0.247115
orf19.6862	C4_05230C_A	C4_05230C_A	1.1948	0.0196911	0.229367	0.999481	0.582177	0.254339
orf19.2717	C4_02790C_A	SAS10	1.1914	0.0279736	0.252033	0.999481	0.733334	0.220989
orf19.4933	C1_13070C_A	FAD3	1.19084	0.0296481	0.466291	0.999481	0.211868	0.730837
orf19.59	C1_05060W_A	REI1	1.18877	0.025431	0.0574826	0.999481	0.750636	0.203956
orf19.4849	C1_09840C_A	C1_09840C_A	1.18792	0.0275299	0.0363075	0.999481	0.515591	0.36209
orf19.3105	C4_07040W_A	C4_07040W_A	1.18547	0.148785	-0.251683	0.999481	0.888646	0.404463
orf19.3477	C6_02350C_A	C6_02350C_A	1.18372	0.0128285	0.0893863	0.999481	0.754239	0.118788
orf19.3120	C4_06910W_A	C4_06910W_A	1.18348	0.358671	1.67939	0.999481	-1.587	0.336918
orf19.2143	C6_04530C_A	C6_04530C_A	1.18295	0.0249381	-0.0194497	0.999481	0.638345	0.254339
orf19.4701	C4_00940W_A	C4_00940W_A	1.18125	0.0419159	0.27672	0.999481	0.604115	0.340366
orf19.706	CR_06720W_A	NMD3	1.1792	0.0189068	0.120565	0.999481	0.429972	0.377391
orf19.5106	C1_08290C_A	DIP2	1.17805	0.0214232	0.0319767	0.999481	0.739904	0.194954
orf19.2320	C1_10950C_A	C1_10950C_A	1.17575	0.0200138	0.0359576	0.999481	0.646083	0.22084
orf19.3188	C5_01840C_A	TAC1	1.17574	0.0128285	0.237389	0.999481	0.441278	0.274384
orf19.6347	C1_12750C_A	C1_12750C_A	1.17348	0.0225216	0.0537267	0.999481	0.784854	0.179819
orf19.6235	C1_06750W_A	C1_06750W_A	1.17113	0.0698225	-0.0894042	0.999481	0.530623	0.503272
orf19.5609	C6_03220W_A	C6_03220W_A	1.16994	0.0201839	0.0862825	0.999481	0.561914	0.268634
orf19.4819	C1_09550W_A	C1_09550W_A	1.16897	0.0603383	0.0588529	0.999481	-0.00521626	0.996435
orf19.4173	C4_00690C_A	C4_00690C_A	1.16831	0.0580117	-0.106291	0.999481	0.472192	0.529041
orf19.81	C2_06660W_A	C2_06660W_A	1.16747	0.0188352	0.266583	0.999481	0.557628	0.249501
orf19.2229	C2_06780C_A	C2_06780C_A	1.16339	0.0338876	0.283685	0.999481	-0.0139143	0.987201
orf19.6449	CR_08720W_A	CR_08720W_A	1.1614	0.133747	0.529651	0.999481	0.632235	0.485376
orf19.3869	CR_06140W_A	CR_06140W_A	1.16025	0.13802	0.367975	0.999481	1.12535	0.257027
orf19.544	CR_04540C_A	RPR2	1.1578	0.0288215	0.21991	0.999481	0.182689	0.768623
orf19.7154	C7_04190C_A	UTP18	1.15591	0.0201866	0.0607372	0.999481	0.56726	0.259713
orf19.2654	C5_03250W_A	RMS1	1.15327	0.0273505	0.258917	0.999481	0.708549	0.214995
tM(CAU)3	C2_06050C_A	tM(CAU)3	1.15165	0.472717	0.679059	0.999481	-0.0583402	0.984127
orf19.847	C2_03750W_A	YIM1	1.14325	0.146065	0.168018	0.999481	0.401348	0.703811
orf19.603	CR_07950W_A	IMP4	1.143	0.0275535	-0.109683	0.999481	0.76698	0.198118
tH(GUG)3	C3_06460C_A	tH(GUG)3	1.14245	0.187494	0.690872	0.999481	0.281136	0.80484
orf19.1090	C6_04320C_A	C6_04320C_A	1.14214	0.0716212	-0.19568	0.999481	0.997197	0.220976
orf19.5843	CR_05610C_A	SRR1	1.13709	0.162259	-0.368562	0.999481	0.825668	0.430711
orf19.7072	C7_00470C_A	PEL1	1.13669	0.0248839	0.0163206	0.999481	0.805573	0.174707
orf19.1687	C3_01560W_A	C3_01560W_A	1.13481	0.0150571	0.138851	0.999481	0.570064	0.202427
orf19.7254	C1_14380C_A	C1_14380C_A	1.13438	0.0593195	-0.0301033	0.999481	0.528915	0.451879
orf19.5100	C1_08210C_A	MLT1	1.13271	0.0087882	0.369598	0.999481	0.383832	0.248728
orf19.4234	C5_02280C_A	C5_02280C_A	1.13188	0.0227118	0.181027	0.999481	0.526686	0.293577
orf19.1772	C2_10090C_A	C2_10090C_A	1.13031	0.0356556	0.133855	0.999481	0.969584	0.147727
orf19.3202	C5_01730W_A	C5_01730W_A	1.13027	0.103462	0.0506806	0.999481	0.996013	0.251737
orf19.3556	C2_05270W_A	C2_05270W_A	1.12925	0.0635192	0.0700229	0.999481	0.811371	0.267353
orf19.3516	CR_05450C_A	CR_05450C_A	1.12819	0.094939	0.673758	0.999481	-0.323479	0.709635
orf19.4000	C5_05080W_A	GRF10	1.12769	0.0240328	0.195496	0.999481	0.72216	0.191957
orf19.1757	C2_10230W_A	C2_10230W_A	1.12684	0.0604395	0.159704	0.999481	0.63818	0.354085
orf19.6408	CR_08420W_A	CR_08420W_A	1.12681	0.0425327	0.165574	0.999481	0.176144	0.795172
orf19.5991	C3_05160C_A	C3_05160C_A	1.12677	0.0161833	0.351769	0.999481	0.376613	0.380247
orf19.5802	C2_03000C_A	C2_03000C_A	1.1266	0.0464821	-0.0190373	0.999481	0.641918	0.323141
orf19.1589	C2_02630W_A	C2_02630W_A	1.12574	0.0352865	0.193431	0.999481	0.75271	0.213805
orf19.4739	C1_08810C_A	MSS116	1.12305	0.0183297	0.513233	0.999481	0.87063	0.110647
orf19.5038	C4_03830W_A	C4_03830W_A	1.12132	0.0231957	0.206282	0.999481	0.690066	0.202427
orf19.7361	C3_05800W_A	C3_05800W_A	1.11981	0.0485278	0.131087	0.999481	0.751553	0.251718
orf19.7285	CR_08900C_A	CR_08900C_A	1.11895	0.050628	-0.058249	0.999481	0.961996	0.187502
orf19.1028	C1_03810C_A	ELA1	1.11714	0.0995031	0.143383	0.999481	1.08198	0.207928
orf19.4531	C1_01920W_A	ROA1	1.11492	0.0310763	0.356177	0.999481	0.817638	0.178729
orf19.6784	C3_07160W_A	PGA32	1.11057	0.099286	0.107587	0.999481	0.311061	0.7311
orf19.3894	C5_04120C_A	C5_04120C_A	1.11035	0.0732854	0.0381059	0.999481	0.595885	0.422597
orf19.702	CR_06680C_A	CR_06680C_A	1.11018	0.0120552	0.276533	0.999481	0.487381	0.218587
orf19.3328	C1_01390C_A	C1_01390C_A	1.10554	0.0222506	0.0338417	0.999481	0.919223	0.111882
orf19.6903	C7_01210C_A	C7_01210C_A	1.10485	0.0915126	-0.20898	0.999481	0.76705	0.345619
orf19.5677	C4_00480W_A	DUR4	1.10321	0.284647	0.224487	0.999481	0.690807	0.606596
orf19.6859	C4_05200C_A	C4_05200C_A	1.101	0.27827	-0.25562	0.999481	0.64978	0.647822
orf19.2369	CR_06960W_A	CR_06960W_A	1.09854	0.0818854	-0.0374757	0.999481	0.453048	0.551581
orf19.1181	C6_00230W_A	C6_00230W_A	1.09838	0.0284398	-0.0181727	0.999481	0.126353	0.841137
tA(AGC)5	C5_04760W_A	tA(AGC)5	1.09683	0.402792	0.256348	0.999481	0.371709	0.850216
orf19.7624	CR_10470C_A	CR_10470C_A	1.09627	0.0183297	0.143283	0.999481	0.640827	0.192829
orf19.6722	C3_07660W_A	C3_07660W_A	1.09625	0.0818854	-0.0500457	0.999481	0.930899	0.235335
orf19.660	C1_11430W_A	C1_11430W_A	1.09445	0.120752	0.142366	0.999481	0.60019	0.479753
orf19.93	C6_00920W_A	C6_00920W_A	1.09328	0.0967544	0.526038	0.999481	-0.638772	0.426567
orf19.4099	C2_06170C_A	ECM17	1.09098	0.253624	-0.0732314	0.999481	-0.0862577	0.959595
orf19.5066	C1_07950C_A	C1_07950C_A	1.08532	0.0288592	0.335348	0.999481	0.586024	0.256575
orf19.6548	C7_01760C_A	ISU1	1.08241	0.0388444	0.592364	0.999481	0.51829	0.357597
orf19.4815	C1_09510W_A	YTM1	1.08156	0.0207701	0.0368649	0.999481	0.474981	0.316612
orf19.7648	CR_10640W_A	CR_10640W_A	1.08105	0.0488109	0.310131	0.999481	-0.503974	0.44143
orf19.4690	C4_00990W_A	C4_00990W_A	1.0775	0.13919	-0.102985	0.999481	0.220803	0.837479
orf19.1633	C3_02130W_A	UTP4	1.07748	0.0195852	0.246225	0.999481	0.446178	0.328651
orf19.25	C2_06480W_A	C2_06480W_A	1.07692	0.0248839	-0.0124238	0.999481	0.653001	0.214995
orf19.4227	C5_02200W_A	C5_02200W_A	1.07474	0.43627	0.865866	0.999481	-1.4801	0.434447
orf19.4255	C5_02460C_A	ECM331	1.0744	0.042464	0.487486	0.999481	-0.252351	0.68118
orf19.4890	C1_10210C_A	CLA4	1.07243	0.0213881	0.264395	0.999481	0.435779	0.352545
orf19.3624	C2_08550C_A	MSU1	1.06989	0.0214723	0.206529	0.999481	1.06823	0.0583031
orf19.4399	CR_03550W_A	NCS2	1.06846	0.0444674	-0.0596064	0.999481	0.720215	0.247256
orf19.3303	C1_01150C_A	C1_01150C_A	1.06815	0.053937	-0.0692454	0.999481	0.818555	0.224816
orf19.2842	CR_02850C_A	GZF3	1.06719	0.0194686	0.00921181	0.999481	0.845555	0.114138
orf19.3265	CR_00900W_A	TRM1	1.06468	0.0333702	-0.029865	0.999481	0.62153	0.261454
orf19.3012	C1_03200C_A	ARO80	1.06443	0.0348392	0.0841068	0.999481	0.626034	0.257591
orf19.3463	C6_02230W_A	C6_02230W_A	1.06185	0.0201859	0.036482	0.999481	0.575879	0.226853
orf19.1720	C3_01310W_A	C3_01310W_A	1.05945	0.0156165	0.157483	0.999481	0.192689	0.642598
orf19.4869	C1_10020W_A	SFU1	1.059	0.0831732	0.308545	0.999481	-1.26973	0.161927
orf19.2829	CR_02700W_A	CR_02700W_A	1.05702	0.0288592	0.480749	0.999481	0.290846	0.549239
orf19.5820	C2_02850W_A	UGA6	1.05698	0.212059	0.203619	0.999481	-0.817409	0.482931
orf19.3276	CR_00800C_A	PWP2	1.05621	0.0231759	0.0771941	0.999481	0.577761	0.244196
orf19.6675	C5_03630C_A	C5_03630C_A	1.05488	0.0538975	0.3818	0.999481	0.321728	0.606352
orf19.7291	CR_08940W_A	CR_08940W_A	1.05473	0.046621	-0.179153	0.999481	0.672416	0.277012
orf19.4937	C1_13110C_A	CHS3	1.05441	0.0087882	0.29413	0.999481	0.377285	0.222448
orf19.6141	CR_07270C_A	HGT16	1.05399	0.0833896	0.492894	0.999481	0.527346	0.439866
orf19.2394	CR_03300C_A	CR_03300C_A	1.05376	0.157348	0.446642	0.999481	-0.147497	0.895608
orf19.985	C1_10440W_A	C1_10440W_A	1.05311	0.0626084	-0.11456	0.999481	0.772883	0.256504
orf19.3704	CR_07750C_A	CR_07750C_A	1.05246	0.0447294	0.0640057	0.999481	0.569328	0.339518
orf19.6828	C3_06760W_A	C3_06760W_A	1.05022	0.0344169	0.505198	0.999481	0.25996	0.630478
orf19.4662	C4_01260W_A	RLM1	1.04963	0.0268231	0.21388	0.999481	0.759807	0.165444
orf19.6938	C3_03790W_A	MEU1	1.04934	0.0680057	0.377709	0.999481	-0.320203	0.649291
orf19.6392	CR_08280W_A	CR_08280W_A	1.0481	0.0623157	-0.0419529	0.999481	0.477628	0.470837
orf19.6691	C7_03590C_A	C7_03590C_A	1.04771	0.0425327	0.458245	0.999481	0.748548	0.202427
orf19.2362	CR_07030C_A	CR_07030C_A	1.04694	0.0534324	0.0583759	0.999481	0.620693	0.323141
orf19.1607	C3_02370C_A	ALR1	1.04598	0.0183297	-0.135735	0.999481	0.684628	0.165444
orf19.2527	CR_01410C_A	CR_01410C_A	1.04448	0.0294158	0.097982	0.999481	0.4306	0.390257
orf19.5166	C7_02950C_A	DBF4	1.04366	0.0490771	-0.0666603	0.999481	0.52644	0.384453
snR56	C2_05600W_A	C2_05600W_A	1.04229	0.153745	-0.0227852	0.999481	1.07544	0.251737
orf19.6741	C3_07470W_A	C3_07470W_A	1.04034	0.213026	0.61561	0.999481	0.0901833	0.946182
orf19.4844	C1_09790C_A	C1_09790C_A	1.03919	0.047454	-0.203562	0.999481	0.737877	0.241349
orf19.6826	C3_06780C_A	SLF1	1.03875	0.102318	0.0950325	0.999481	0.305676	0.724318
orf19.3288	C1_00990C_A	NMA111	1.03719	0.0155385	0.174313	0.999481	0.542173	0.200731
orf19.6418	CR_08500W_A	CR_08500W_A	1.03675	0.0201839	0.0582121	0.999481	0.386315	0.381594
orf19.4161	C4_00800W_A	C4_00800W_A	1.03432	0.0524925	0.187409	0.999481	0.660129	0.278327
orf19.2575	CR_01780W_A	CR_01780W_A	1.03416	0.0314407	0.415272	0.999481	0.447972	0.36655
orf19.7017	C7_00970C_A	YOX1	1.0334	0.0716384	0.288016	0.999481	0.507436	0.438998
orf19.3220	C5_03920C_A	C5_03920C_A	1.0284	0.0317104	0.0552876	0.999481	0.659146	0.221262
orf19.7194	C7_03880C_A	C7_03880C_A	1.02774	0.0231759	0.0662832	0.999481	0.901691	0.0989103
orf19.3742	CR_02270C_A	CR_02270C_A	1.02725	0.17373	0.11208	0.999481	0.415447	0.68118
orf19.2616	CR_02160W_A	UGT51C1	1.02569	0.148201	-0.15208	0.999481	0.0583247	0.96327
orf19.7065	C7_00530C_A	PSF3	1.02462	0.046671	0.0326879	0.999481	0.365089	0.535724
orf19.4802	C1_09400C_A	FTH1	1.02388	0.357382	-0.0788385	0.999481	5.3101	0.00210409
orf19.4268	C5_02550C_A	UTP13	1.02337	0.0203825	-0.0029709	0.999481	0.692733	0.169007
orf19.6916	C7_01350C_A	C7_01350C_A	1.02143	0.0275299	0.572391	0.999481	0.391665	0.384639
orf19.6757	C3_07340W_A	GCY1	1.01961	0.163671	-0.784577	0.999481	0.241012	0.823061
orf19.5217	C2_05970C_A	TES1	1.01631	0.0286374	0.166416	0.999481	0.250424	0.62055
orf19.7552	CR_09800C_A	CR_09800C_A	1.01417	0.017508	0.263565	0.999481	0.389416	0.337358
orf19.6054	C1_00540C_A	C1_00540C_A	1.01383	0.017508	0.0335293	0.999481	0.815264	0.0938848
orf19.6827	C3_06770W_A	SLU7	1.01358	0.0959693	0.173883	0.999481	0.60774	0.398272
orf19.6907	C7_01270C_A	C7_01270C_A	1.0125	0.0199458	-0.0400934	0.999481	0.434947	0.317525
orf19.4677	C4_01130C_A	C4_01130C_A	1.011	0.029691	0.166088	0.999481	0.412461	0.393393
orf19.4801	C1_09390W_A	C1_09390W_A	1.01051	0.0552558	0.0176636	0.999481	0.684261	0.272365
orf19.1335	C7_03400C_A	C7_03400C_A	1.0091	0.0183297	0.134393	0.999481	0.614524	0.185533
orf19.3773	C4_05060W_A	CDL1	1.00818	0.0411378	-0.0287265	0.999481	0.267975	0.635985
orf19.3795	C4_04840C_A	AGP3	1.00668	0.252371	0.149692	0.999481	-0.00967377	0.995015
orf19.4573	C4_02180C_A	ZCF26	1.00617	0.144528	0.112781	0.999481	-0.116847	0.916583
orf19.1642	C3_02040C_A	C3_02040C_A	1.00598	0.0493899	0.123849	0.999481	0.506444	0.38219
orf19.1150.1	C1_11680C_A	C1_11680C_A	1.00462	0.027964	0.194127	0.999481	0.415639	0.38219
orf19.5867	C3_04250W_A	WSC1	1.00458	0.0200167	0.135281	0.999481	0.0684306	0.893766
orf19.3431	C6_01550C_A	C6_01550C_A	1.0036	0.056748	0.108592	0.999481	0.799446	0.214385
orf19.929	C5_00600C_A	C5_00600C_A	1.00236	0.234429	-0.852523	0.999481	-0.137979	0.933111
orf19.4643	C4_01420W_A	C4_01420W_A	1.00095	0.0207769	0.166925	0.999481	0.649827	0.17777
orf19.6297	C5_01610W_A	C5_01610W_A	1.00034	0.0207701	0.281453	0.999481	0.502613	0.251718
orf19.2309	C1_11070W_A	PET127	0.999687	0.0150571	0.21884	0.999481	0.834861	0.0596306
orf19.3098	C4_07100C_A	C4_07100C_A	0.999513	0.023194	0.0965197	0.999481	0.488733	0.285881
orf19.1992	C2_01330C_A	SIR2	0.997236	0.0225216	0.135729	0.999481	0.495452	0.270196
orf19.5353	C2_10730W_A	C2_10730W_A	0.995976	0.164764	0.0876589	0.999481	0.370754	0.706739
orf19.5513	C6_02440C_A	PRP45	0.99325	0.0345151	-0.0433673	0.999481	0.714305	0.202427
orf19.7397.1	C3_06160C_A	C3_06160C_A	0.991336	0.162206	0.148158	0.999481	-0.077921	0.949766
snR65	CR_08140W_A	CR_08140W_A	0.989569	0.342668	1.42417	0.999481	0.337627	0.791905
orf19.4793	C1_09330W_A	C1_09330W_A	0.989442	0.0303411	0.166527	0.999481	0.424568	0.375868
orf19.7050	C7_00690W_A	NOP15	0.987936	0.0504055	-0.0276273	0.999481	0.725944	0.229931
orf19.475	CR_03940W_A	CR_03940W_A	0.98544	0.0152416	0.172351	0.999481	0.402026	0.270196
orf19.3034	C1_03350C_A	RLI1	0.981591	0.0122399	0.183667	0.999481	0.249208	0.452351
orf19.6648	CR_05660W_A	SDA1	0.97995	0.0275299	0.396904	0.999481	0.364455	0.430615
orf19.3746	CR_02240C_A	OPT2	0.979186	0.156049	-0.127067	0.999481	-1.30133	0.229872
orf19.3644	C6_00800C_A	C6_00800C_A	0.979153	0.0300949	0.513054	0.999481	0.00302521	0.99671
orf19.6413	CR_08440W_A	CR_08440W_A	0.978981	0.048573	-0.189226	0.999481	0.582105	0.325253
orf19.3539	C2_05080C_A	C2_05080C_A	0.976905	0.0439537	0.0634176	0.999481	0.68712	0.224816
orf19.1663	C3_01830C_A	MNT2	0.976527	0.0288215	0.0297588	0.999481	0.709785	0.181212
orf19.5984	C3_05110W_A	C3_05110W_A	0.976384	0.0530389	0.248888	0.999481	0.546342	0.336918
orf19.5537	C6_02670C_A	WSC2	0.975896	0.0686309	0.11559	0.999481	0.617731	0.331121
orf19.3373	C4_03460C_A	C4_03460C_A	0.971305	0.477389	0.687207	0.999481	-0.839986	0.651958
orf19.6570	C7_01560C_A	NUP	0.968326	0.0605625	-0.534566	0.999481	-0.250993	0.725153
orf19.581	C5_00790C_A	C5_00790C_A	0.968014	0.0124388	0.137266	0.999481	0.768387	0.0638516
orf19.7307	CR_09110C_A	CR_09110C_A	0.967918	0.0117631	0.414877	0.999481	0.850821	0.0314503
orf19.6066	C1_00410C_A	C1_00410C_A	0.967496	0.0145778	0.488112	0.999481	-0.0592381	0.884155
orf19.5140	C7_03150W_A	C7_03150W_A	0.966478	0.54769	-0.339463	0.999481	-0.932576	0.719536
orf19.2385	CR_03370C_A	KTI12	0.966287	0.0425429	-0.0126286	0.999481	0.570879	0.289676
orf19.4889	C1_10200C_A	C1_10200C_A	0.965472	0.0780809	-0.00202409	0.99972	0.668298	0.315697
orf19.4159	C4_00820W_A	C4_00820W_A	0.964756	0.0178542	0.519298	0.999481	0.501935	0.202427
orf19.6769	C3_07290W_A	C3_07290W_A	0.963947	0.0268231	0.0981518	0.999481	0.438215	0.338225
orf19.429	C1_05360C_A	C1_05360C_A	0.963269	0.0428177	-0.0383247	0.999481	0.7037	0.214995
orf19.5302	C4_04080C_A	PGA31	0.963141	0.344663	0.0543041	0.999481	-0.4765	0.760164
orf19.1359	C2_09930W_A	C2_09930W_A	0.962634	0.0712135	0.057583	0.999481	0.178058	0.799789
orf19.6137	CR_07310W_A	CR_07310W_A	0.962109	0.0266943	-0.0237268	0.999481	0.976356	0.0774789
orf19.168	CR_02550C_A	CR_02550C_A	0.961464	0.0457917	-0.116785	0.999481	0.714989	0.218834
orf19.3630	C2_08480W_A	RRP8	0.960559	0.0380323	0.138573	0.999481	0.637799	0.228725
orf19.2545	CR_01580C_A	DOT6	0.959171	0.046671	0.300858	0.999481	0.596817	0.272365
orf19.7010	C7_01040C_A	C7_01040C_A	0.958336	0.0534324	0.313713	0.999481	-0.0634627	0.930604
orf19.5770	C6_03930W_A	OPT8	0.956897	0.298114	-0.301573	0.999481	0.507061	0.70389
orf19.1891	C2_07400C_A	APR1	0.956691	0.158204	0.348679	0.999481	-0.252887	0.788605
orf19.69	C1_12470W_A	C1_12470W_A	0.956388	0.252523	0.169465	0.999481	1.53304	0.176184
orf19.1887	C2_07440C_A	C2_07440C_A	0.954174	0.148996	-0.305787	0.999481	0.732549	0.383696
orf19.3954.1	C5_04690C_A	C5_04690C_A	0.953976	0.28552	0.516988	0.999481	-1.35325	0.290946
orf19.6992	C3_05570W_A	QDR2	0.952515	0.0440125	0.0287448	0.999481	0.497342	0.352852
orf19.4420	C4_06090C_A	C4_06090C_A	0.952464	0.0135894	0.245356	0.999481	0.517751	0.165444
orf19.7634	CR_10540C_A	MCD1	0.95224	0.110768	0.0327759	0.999481	0.507637	0.486241
orf19.2922	C4_06150C_A	C4_06150C_A	0.950113	0.409212	-0.434213	0.999481	0.542526	0.754991
orf19.3778	C4_05010W_A	C4_05010W_A	0.950093	0.0260237	0.0834881	0.999481	0.43816	0.327743
orf19.3675	C1_02180W_A	GAL7	0.949433	0.260182	0.893481	0.999481	-1.64131	0.185533
orf19.4757	C1_09010W_A	NAR1	0.948488	0.0321353	-0.117599	0.999481	0.398558	0.405178
orf19.4963	C1_13370W_A	C1_13370W_A	0.947482	0.026188	0.106247	0.999481	0.46486	0.295515
orf19.7293	CR_08960C_A	MPS1	0.945964	0.0967262	0.266654	0.999481	0.40888	0.541304
orf19.541	CR_04500C_A	CR_04500C_A	0.943591	0.226107	-0.316799	0.999481	0.620593	0.546181
orf19.6653	CR_05620C_A	MTG2	0.942224	0.0338756	0.191613	0.999481	0.849289	0.127357
orf19.7381	C3_06000W_A	AHR1	0.941371	0.0152416	0.885259	0.252039	0.42941	0.221516
orf19.6259	C1_06540C_A	C1_06540C_A	0.940797	0.0578599	-0.0338482	0.999481	0.495189	0.388783
orf19.6417	CR_08490W_A	TSR1	0.940305	0.0231759	0.00708588	0.999481	0.474385	0.272626
orf19.7392	C3_06100C_A	DED1	0.940299	0.010586	0.252237	0.999481	0.544257	0.117043
orf19.1979	C5_00880C_A	GIT3	0.938938	0.0599715	0.0477242	0.999481	0.247128	0.688387
orf19.4592	C4_02010C_A	HSX11	0.938587	0.0496225	0.304226	0.999481	1.0561	0.0926419
orf19.4476	C1_04010C_A	C1_04010C_A	0.937285	0.292905	0.532684	0.999481	-0.0680188	0.965471
orf19.7376	C3_05950W_A	C3_05950W_A	0.936219	0.0484449	-0.301969	0.999481	0.559198	0.329286
orf19.506	CR_04200W_A	YDJ1	0.934187	0.0159347	0.181196	0.999481	0.203773	0.568891
orf19.6662	C5_03530C_A	C5_03530C_A	0.93378	0.0178542	-0.0586741	0.999481	0.53387	0.198492
orf19.6041	C1_00640C_A	RPO41	0.933549	0.0152416	0.251064	0.999481	0.992413	0.0284668
orf19.7173	C7_04060W_A	C7_04060W_A	0.93254	0.113281	0.216139	0.999481	0.382324	0.602878
orf19.7115	C7_00080C_A	SAC7	0.929414	0.0502439	0.0971219	0.999481	0.0747211	0.911673
orf19.4459	C1_03870C_A	C1_03870C_A	0.929381	0.373345	0.0358852	0.999481	-0.621536	0.674966
orf19.7041	C7_00780W_A	C7_00780W_A	0.928169	0.0117631	0.110554	0.999481	0.532261	0.138632
orf19.2579	CR_01790C_A	CR_01790C_A	0.92671	0.0706355	-0.122093	0.999481	0.404846	0.51866
orf19.4401	CR_03570C_A	YVH1	0.926634	0.0370082	0.148349	0.999481	0.445418	0.354142
orf19.3443	C6_01410C_A	OYE2	0.925217	0.336611	-0.0305234	0.999481	0.0687958	0.968647
orf19.2185	C2_07960C_A	NSA1	0.924342	0.0419254	0.053534	0.999481	0.556862	0.277012
snR76	C4_01610C_A	C4_01610C_A	0.923957	0.205739	0.53325	0.999481	0.505935	0.567405
orf19.4746	C1_08870C_A	JIP5	0.923436	0.0297305	0.0923436	0.999481	0.437876	0.336918
orf19.4239	C5_02310C_A	C5_02310C_A	0.923067	0.266117	0.794615	0.999481	-0.339157	0.767743
orf19.3578	C2_05490W_A	C2_05490W_A	0.922615	0.0450118	-0.125319	0.999481	0.394204	0.464976
orf19.7384	C3_06030W_A	NOG1	0.921321	0.0274353	0.349329	0.999481	0.324282	0.456682
orf19.6589	CR_09730C_A	SSF1	0.921265	0.0199591	0.14526	0.999481	0.363371	0.353585
orf19.2319	C1_10970W_A	C1_10970W_A	0.921088	0.030363	0.0661915	0.999481	0.537078	0.254339
orf19.6230	C1_06800W_A	C1_06800W_A	0.919795	0.0440125	0.0684668	0.999481	0.442173	0.384391
orf19.4363	CR_03650W_A	SGD1	0.918935	0.0374618	0.0141322	0.999481	0.669024	0.202427
orf19.5612	C6_03250W_A	BMT4	0.918904	0.203767	-0.408039	0.999481	1.44557	0.174896
orf19.5824	C2_02820C_A	C2_02820C_A	0.915858	0.0159885	0.0384522	0.999481	0.41034	0.253131
orf19.5938	C3_04760C_A	SEN1	0.915619	0.0110598	0.0320217	0.999481	0.512989	0.128606
orf19.3252	CR_01030W_A	DAL81	0.914526	0.076905	-0.0275727	0.999481	0.549976	0.375111
orf19.278	C3_02870C_A	C3_02870C_A	0.913597	0.303098	0.325165	0.999481	0.256436	0.841902
orf19.5987	C3_05140C_A	C3_05140C_A	0.912589	0.025314	-0.0628537	0.999481	0.343812	0.413929
orf19.2638	C5_03430W_A	C5_03430W_A	0.912396	0.162673	-0.0891274	0.999481	0.915322	0.27616
orf19.6010	C1_00950C_A	CDC5	0.908723	0.061316	0.0957331	0.999481	0.679955	0.251135
orf19.5391	C3_00660W_A	C3_00660W_A	0.90689	0.0313983	-0.143491	0.999481	0.808754	0.13072
orf19.1388	C2_09660W_A	C2_09660W_A	0.906884	0.0606182	0.112908	0.999481	0.538858	0.341325
orf19.6227	C1_06820W_A	C1_06820W_A	0.906022	0.0964889	-0.220735	0.999481	0.684715	0.312239
orf19.5110	C1_08310W_A	OPY2	0.906017	0.0156884	0.305532	0.999481	0.496596	0.185334
orf19.6710	C3_07750W_A	UTP9	0.905376	0.0338876	-0.00718822	0.999481	0.545551	0.254339
orf19.5847	CR_05550C_A	CR_05550C_A	0.905189	0.023194	0.0406801	0.999481	0.370802	0.36655
orf19.2066	C2_00620C_A	C2_00620C_A	0.904842	0.0214723	0.220306	0.999481	0.561925	0.190713
orf19.3192	C5_01820W_A	STI1	0.904485	0.0318665	0.131464	0.999481	0.393868	0.384639
orf19.2893	C4_06410W_A	C4_06410W_A	0.902762	0.0201692	0.0993133	0.999481	0.290414	0.447133
orf19.3404	C6_01810W_A	C6_01810W_A	0.90029	0.288083	0.238358	0.999481	-1.06148	0.375868
orf19.1835	C1_10640C_A	PEA2	0.899685	0.0152416	0.0110665	0.999481	0.493331	0.184254
orf19.5229	C1_12350W_A	C1_12350W_A	0.899321	0.0131835	0.0831335	0.999481	0.517792	0.154507
orf19.5716	C6_03500C_A	SAP4	0.89908	0.419004	-0.129475	0.999481	0.676723	0.654917
orf19.2667	C4_03270W_A	RPF1	0.898769	0.0362068	0.140903	0.999481	0.503182	0.289344
orf19.6205	C1_07010W_A	C1_07010W_A	0.897103	0.0626084	0.136086	0.999481	0.795313	0.190713
orf19.5011	C1_13740W_A	KAR9	0.896932	0.230331	0.468658	0.999481	0.659211	0.456976
orf19.6260	C1_06530C_A	C1_06530C_A	0.89683	0.0322527	-0.0160009	0.999481	0.49426	0.284695
orf19.2631	C4_05260W_A	C4_05260W_A	0.896154	0.0168745	0.201023	0.999481	0.311304	0.367708
orf19.1139	C1_11770C_A	C1_11770C_A	0.895892	0.0462209	0.0626012	0.999481	0.644161	0.228045
orf19.123	C6_01160W_A	RCN1	0.89573	0.0514418	0.265577	0.999481	0.287118	0.585463
orf19.5180	C7_02810W_A	PRX1	0.894535	0.118532	0.058606	0.999481	-0.353362	0.6272
orf19.3304	C1_01160C_A	C1_01160C_A	0.894248	0.0473285	0.0988379	0.999481	0.608042	0.246589
orf19.6837	C1_04450C_A	FMA1	0.893864	0.0117631	-0.238959	0.999481	0.749693	0.0468675
orf19.6831	C3_06720W_A	PRP5	0.893518	0.0152416	0.101197	0.999481	0.483301	0.186586
orf19.1492	C2_01830W_A	PRP39	0.892073	0.0626084	-0.0795515	0.999481	0.775429	0.202427
orf19.3530	C2_04980C_A	CKA2	0.892038	0.0490006	0.114962	0.999481	0.494796	0.339518
orf19.480	CR_03980W_A	CR_03980W_A	0.891592	0.0493899	0.097954	0.999481	0.549706	0.289676
orf19.3788	C4_04910C_A	SPC34	0.889324	0.0439537	0.0261987	0.999481	0.352331	0.478731
orf19.2927	C1_02400C_A	MNN11	0.888634	0.0207372	0.26251	0.999481	0.475855	0.223399
orf19.4069	C2_09110C_A	C2_09110C_A	0.888336	0.0902981	0.563928	0.999481	0.573235	0.336231
orf19.1340	C7_03350C_A	C7_03350C_A	0.8855	0.073752	0.344671	0.999481	-0.377586	0.526185
orf19.5258	C1_12070C_A	C1_12070C_A	0.885481	0.0833642	0.0655433	0.999481	0.211197	0.755677
orf19.1836	C1_10650W_A	APN2	0.882723	0.0921901	-0.209445	0.999481	0.66836	0.307227
orf19.4678	C4_01120C_A	C4_01120C_A	0.882674	0.0384534	0.0290966	0.999481	0.440665	0.352545
orf19.5057	C1_07860W_A	C1_07860W_A	0.881984	0.0335943	0.160307	0.999481	0.262007	0.560327
orf19.5271	C1_11940C_A	C1_11940C_A	0.881969	0.0393644	0.180526	0.999481	0.675704	0.186296
orf19.4078	C2_09160W_A	C2_09160W_A	0.880353	0.0303411	0.0734833	0.999481	0.619066	0.192211
orf19.2461	C1_05880W_A	PRN4	0.880025	0.357622	0.680654	0.999481	-1.24386	0.339518
orf19.5407	C3_00560C_A	SOF1	0.879935	0.0268231	-5.56505e-06	0.99998	0.582213	0.198492
orf19.4681	C4_01080W_A	RAT1	0.877542	0.0117631	0.123161	0.999481	0.524754	0.128042
orf19.6220	C1_06910C_A	C1_06910C_A	0.877215	0.0166656	0.000594253	0.99972	0.393351	0.256504
orf19.1911	C2_00100C_A	PGA52	0.876872	0.225301	-0.171738	0.999481	-0.265878	0.796013
orf19.499	CR_04150W_A	CR_04150W_A	0.876262	0.0918511	1.16477	0.7371	-0.332221	0.560009
orf19.2119	C2_00140W_A	NDT80	0.875808	0.0493899	-0.12217	0.999481	0.805601	0.170721
orf19.1782.1	C2_10000C_A	C2_10000C_A	0.875796	0.374459	0.608503	0.999481	-1.30166	0.339518
orf19.2317	C1_10980W_A	C1_10980W_A	0.874544	0.367434	0.492004	0.999481	-0.893192	0.492969
orf19.5749	C6_03750C_A	SBA1	0.874458	0.156393	0.0413585	0.999481	-0.0428492	0.968647
orf19.2479	C1_05710C_A	UGA4	0.872942	0.121022	-0.266864	0.999481	-0.207712	0.806607
orf19.6500	C7_02150C_A	ECM42	0.872224	0.0693884	-0.0413672	0.999481	-0.515466	0.406625
orf19.7460	CR_00670C_A	CR_00670C_A	0.870621	0.0886823	-0.0939055	0.999481	0.412472	0.515681
orf19.3226	CR_01280C_A	CR_01280C_A	0.869836	0.0176457	0.605382	0.851119	0.162639	0.632049
snR39b	C1_05730W_A	C1_05730W_A	0.868399	0.26784	-0.169439	0.999481	1.41009	0.198118
orf19.7618	CR_10410C_A	CR_10410C_A	0.868111	0.0329931	-0.0160706	0.999481	0.334042	0.447133
orf19.563	C2_09380W_A	RRP15	0.868075	0.0457917	0.120115	0.999481	0.476009	0.336705
orf19.1541	C2_02230C_A	C2_02230C_A	0.866738	0.399337	0.863449	0.999481	-1.1441	0.39206
orf19.4120	C2_06000W_A	LAS1	0.866165	0.0538975	0.178853	0.999481	0.659262	0.218421
snR62	C1_10590W_A	C1_10590W_A	0.865318	0.183948	0.326264	0.999481	0.937112	0.244432
orf19.3159	C3_01200W_A	UTP20	0.864448	0.0332019	0.111946	0.999481	0.641642	0.191067
orf19.7654	CR_10670W_A	CPR6	0.8622	0.208425	-0.124619	0.999481	-0.228071	0.814598
orf19.6583	C7_01460C_A	C7_01460C_A	0.861669	0.0731061	0.41762	0.999481	0.368861	0.495872
orf19.5059	C1_07880C_A	GCS1	0.859702	0.140849	-0.0286556	0.999481	0.850506	0.257027
orf19.6022	C1_00840C_A	NRM1	0.859675	0.09956	0.195208	0.999481	0.447483	0.472211
orf19.6072	C1_00360W_A	CDC13	0.858253	0.0560631	-0.119062	0.999481	0.286142	0.602878
orf19.2697	C4_02960W_A	C4_02960W_A	0.8581	0.0152416	0.0129921	0.999481	0.413211	0.219822
orf19.4496	C2_04540C_A	GDT1	0.856143	0.0582871	0.122571	0.999481	0.42938	0.406625
orf19.2445	C1_06000W_A	C1_06000W_A	0.855572	0.507249	-0.649309	0.999481	-0.622499	0.773265
orf19.6705	C7_03480W_A	C7_03480W_A	0.855423	0.0510814	0.100761	0.999481	0.440863	0.380178
orf19.5865	C3_04230W_A	C3_04230W_A	0.855014	0.160402	0.0933663	0.999481	0.666227	0.374697
orf19.4335	C5_03060C_A	TNA1	0.854723	0.510114	1.90597	0.999481	-3.47745	0.116666
orf19.5039	C4_03840C_A	RRP42	0.853806	0.0376538	-0.0636601	0.999481	0.447603	0.330708
orf19.910	C2_03200W_A	PRP3	0.851853	0.0628126	0.153656	0.999481	0.771159	0.185334
orf19.7635	CR_10550W_A	DRS1	0.850882	0.0345151	0.151445	0.999481	0.35308	0.417802
orf19.1149	C1_11700C_A	MRF1	0.850131	0.430627	-0.151168	0.999481	-0.128181	0.946376
orf19.6786	C3_07140C_A	C3_07140C_A	0.849154	0.287668	-0.0810906	0.999481	0.831283	0.416493
snR35a	CR_00450C_A	CR_00450C_A	0.848851	0.0891017	0.361856	0.999481	0.708571	0.231584
orf19.4142	C5_01470C_A	C5_01470C_A	0.847904	0.0441851	0.371786	0.999481	0.462304	0.311362
orf19.3468	C6_02270C_A	ALG11	0.846865	0.0288592	0.0963845	0.999481	0.678562	0.147669
orf19.661	C1_11420W_A	KRR1	0.846689	0.0342127	0.120656	0.999481	0.326025	0.450848
orf19.3798	C4_04810C_A	C4_04810C_A	0.846144	0.0540593	-0.0262053	0.999481	0.533542	0.299669
orf19.2404	CR_03200C_A	CR_03200C_A	0.84501	0.0700756	-0.143135	0.999481	0.594018	0.29381
orf19.5859	C3_04160W_A	DAL8	0.844619	0.574544	0.927575	0.999481	1.03773	0.534691
orf19.2386	CR_03360W_A	CR_03360W_A	0.844465	0.0564581	-0.151466	0.999481	0.622942	0.246589
orf19.893	C2_03350W_A	PGA17	0.842617	0.34051	0.983024	0.999481	0.347254	0.760164
orf19.6081	C1_00220W_A	PHR2	0.842003	0.0115739	-0.370418	0.999481	0.458894	0.144781
orf19.4861	C1_09930W_A	C1_09930W_A	0.841714	0.477306	0.493564	0.999481	0.0915802	0.965107
orf19.3227	CR_01270C_A	FTH2	0.840273	0.023194	0.305343	0.999481	0.417155	0.267539
orf19.7370	C3_05900W_A	C3_05900W_A	0.839667	0.100579	0.523639	0.999481	0.132594	0.844299
orf19.7011	C7_01030C_A	C7_01030C_A	0.83933	0.0391598	0.23373	0.999481	0.4692	0.302599
orf19.6233	C1_06770W_A	C1_06770W_A	0.837349	0.020819	0.162258	0.999481	0.376428	0.302491
orf19.2676	C4_03140C_A	C4_03140C_A	0.836387	0.0510348	-0.0104281	0.999481	0.430957	0.382038
orf19.1449	C2_01450C_A	C2_01450C_A	0.836125	0.354788	0.58973	0.999481	0.0913385	0.950773
orf19.723	CR_06440C_A	BCR1	0.835101	0.0137108	0.339403	0.999481	0.0794298	0.803809
orf19.5919	C3_04610W_A	MEA1	0.834036	0.11311	0.359223	0.999481	0.859709	0.195144
orf19.2045	C2_00790C_A	C2_00790C_A	0.833802	0.0370082	0.0555133	0.999481	0.55155	0.228045
orf19.7332	CR_09370W_A	ELF1	0.833801	0.0183297	0.0812742	0.999481	0.959631	0.0307686
orf19.3352	C1_01620C_A	C1_01620C_A	0.833256	0.0949494	0.909013	0.999481	-0.934554	0.171511
orf19.5816	C2_02880C_A	EBP7	0.83318	0.138508	0.0278569	0.999481	0.32714	0.653622
orf19.2193	C2_07890W_A	PRS5	0.832303	0.0183368	0.105579	0.999481	0.394074	0.2572
orf19.1304	C4_03740W_A	C4_03740W_A	0.831558	0.0273505	0.00307333	0.999481	0.551006	0.198118
orf19.6146	CR_07240C_A	CLG1	0.830867	0.076905	0.0251961	0.999481	0.596609	0.29668
orf19.6951	C3_03680W_A	C3_03680W_A	0.830194	0.0833896	-0.0423089	0.999481	0.47895	0.404463
orf19.5808	C2_02960C_A	C2_02960C_A	0.829083	0.024354	0.00250166	0.999481	0.588683	0.171511
orf19.2847	CR_02890C_A	CR_02890C_A	0.828996	0.0635171	0.000812733	0.99972	0.673468	0.222828
orf19.5940	C3_04770C_A	ZCF32	0.828326	0.15379	0.194413	0.999481	-0.239071	0.774847
orf19.1618.1	C3_02270W_A	C3_02270W_A	0.827923	0.0342127	0.627609	0.999481	0.455781	0.251737
orf19.2721	C4_02770C_A	C4_02770C_A	0.827731	0.197778	0.0810623	0.999481	0.0499057	0.965471
orf19.3481	C6_02380W_A	C6_02380W_A	0.827356	0.0423179	0.207346	0.999481	0.538931	0.251737
orf19.1082	C6_04240W_A	C6_04240W_A	0.826962	0.145664	0.0086884	0.999481	0.342443	0.647295
orf19.1027	C1_03820W_A	PDR16	0.822643	0.0697636	0.0778213	0.999481	0.712268	0.214995
orf19.451	CR_06000W_A	SOK1	0.822126	0.0174939	-0.101042	0.999481	0.438644	0.210137
orf19.6597	CR_09660W_A	CR_09660W_A	0.821541	0.0548578	0.227497	0.999481	0.471381	0.336231
orf19.6948	C3_03710W_A	CCC1	0.819995	0.0909526	0.143538	0.999481	-0.477498	0.416523
orf19.2204	C2_07760W_A	C2_07760W_A	0.819497	0.151764	0.108967	0.999481	0.484644	0.488543
orf19.7650	CR_10650W_A	LTV1	0.819397	0.0497502	0.0663196	0.999481	0.178081	0.730843
orf19.4688	C4_01010C_A	DAG7	0.818552	0.0306058	-0.201641	0.999481	0.94063	0.0638516
orf19.6152	CR_07200W_A	CR_07200W_A	0.817311	0.0275299	0.378114	0.999481	0.19302	0.612442
orf19.1528	C2_02120W_A	C2_02120W_A	0.817127	0.0201612	0.257674	0.999481	0.645364	0.116666
orf19.3187	C5_01850C_A	ZNC1	0.816535	0.069028	0.114233	0.999481	0.242153	0.66265
orf19.2314	C1_11000C_A	C1_11000C_A	0.81648	0.048386	0.133177	0.999481	0.33765	0.468489
orf19.76	C6_04160C_A	SPB1	0.81575	0.0454645	0.203486	0.999481	0.50859	0.278863
orf19.7488	CR_00460C_A	CR_00460C_A	0.815146	0.0432536	0.169178	0.999481	0.604282	0.203956
orf19.4787	C1_09280W_A	C1_09280W_A	0.813931	0.0647531	0.145866	0.999481	0.270851	0.606352
orf19.3207	C5_01680C_A	CCN1	0.812592	0.173824	0.209615	0.999481	0.253098	0.75639
orf19.5063	C1_07900W_A	COI1	0.810608	0.0231245	-0.310014	0.999481	3.858	6.35931e-06
orf19.604	CR_07940W_A	CR_07940W_A	0.809988	0.242376	-0.0895983	0.999481	0.102236	0.931354
orf19.3793	C4_04860W_A	C4_04860W_A	0.809663	0.140082	0.746603	0.999481	0.685514	0.288558
orf19.3301	C1_01130W_A	C1_01130W_A	0.809422	0.186628	-0.0136308	0.999481	0.381131	0.632981
orf19.809	C2_04120C_A	C2_04120C_A	0.808331	0.0349432	0.16308	0.999481	0.395901	0.346097
orf19.3681	C1_02240W_A	C1_02240W_A	0.808304	0.0156165	-0.0826099	0.999481	0.500657	0.156056
orf19.2998	C1_03060C_A	TSR2	0.807382	0.0504234	0.0286749	0.999481	0.455184	0.340252
orf19.832	C2_03920C_A	GPI13	0.807155	0.0378367	-0.0145798	0.999481	0.518296	0.242434
orf19.4853	C1_09870W_A	HCM1	0.806495	0.186647	0.0969312	0.999481	0.77832	0.302319
orf19.7585	CR_10100C_A	INO1	0.806379	0.134256	0.358452	0.999481	-1.22986	0.152533
orf19.4450	C1_07170C_A	ZCF23	0.80592	0.103762	1.02613	0.851119	-0.723965	0.226853
orf19.6707	C7_03500W_A	C7_03500W_A	0.804603	0.0463147	-0.119571	0.999481	0.582294	0.228045
orf19.2198	C2_07830W_A	FLC3	0.804568	0.0183297	0.5905	0.799867	0.237068	0.449443
orf19.4965	C1_13390W_A	C1_13390W_A	0.803906	0.0489339	0.214938	0.999481	0.216995	0.649024
snR72	C4_01570C_A	C4_01570C_A	0.802919	0.267009	0.648967	0.999481	-0.0396777	0.974003
orf19.3865	CR_06110C_A	RFX1	0.802902	0.0732854	-0.038019	0.999481	0.151885	0.80114
orf19.3569	C2_05380W_A	C2_05380W_A	0.802016	0.0222506	0.0868067	0.999481	0.334614	0.348399
orf19.5465	C3_00100W_A	C3_00100W_A	0.801492	0.0497682	-0.00207971	0.99972	0.408795	0.381785
orf19.663	C1_11400C_A	GIN4	0.801378	0.0440125	0.0232453	0.999481	0.411522	0.36209
orf19.6754	C3_07370W_A	C3_07370W_A	0.801214	0.066379	-0.0301318	0.999481	0.348283	0.501583
orf19.4769	C1_09120W_A	IPT1	0.800872	0.12473	0.481055	0.999481	0.535659	0.378774
orf19.454	CR_05990C_A	SFL1	0.800688	0.0284398	-0.161976	0.999481	0.592566	0.176644
orf19.313	C3_03140C_A	DAL4	0.799786	0.315022	-0.0777596	0.999481	0.0434229	0.976414
orf19.6000	C3_05220W_A	CDR1	0.798723	0.0176457	0.779016	0.280917	0.0520682	0.891211
orf19.7621	CR_10440W_A	CR_10440W_A	0.795638	0.042464	-0.0621326	0.999481	0.445996	0.318739
orf19.1968.1	C5_01020C_A	C5_01020C_A	0.793043	0.079708	-0.166713	0.999481	0.798078	0.191067
orf19.2591	CR_01920W_A	CR_01920W_A	0.791685	0.328143	1.15378	0.999481	0.425051	0.662761
orf19.666	C1_11370C_A	C1_11370C_A	0.791055	0.0227118	-0.174982	0.999481	0.330749	0.363569
orf19.5608	C6_03210C_A	C6_03210C_A	0.790261	0.0496225	0.0306053	0.999481	0.445838	0.336863
orf19.1065	C1_04300C_A	SSA2	0.790196	0.0564226	0.146144	0.999481	-0.0654397	0.912487
orf19.7599	CR_10240W_A	UTP5	0.790033	0.0490771	0.111289	0.999481	0.365213	0.426115
orf19.259	C3_02670W_A	C3_02670W_A	0.789785	0.129912	-0.146375	0.999481	0.469773	0.478731
orf19.1646	C3_02020W_A	C3_02020W_A	0.789612	0.0437688	0.126638	0.999481	0.316808	0.468418
orf19.4543	C1_01810C_A	UGA2	0.789098	0.287668	0.112168	0.999481	-0.32186	0.769363
orf19.3809	C4_04730W_A	BAS1	0.788779	0.0115739	-0.19825	0.999481	0.430397	0.154088
orf19.5032	C1_13940W_A	SIM1	0.788612	0.0147047	-0.0926052	0.999481	0.788653	0.0331301
orf19.4856	C1_09900W_A	LIP3	0.788183	0.299381	0.824832	0.999481	-1.21911	0.246589
orf19.2051	C2_00730C_A	C2_00730C_A	0.78522	0.03911	-0.0866161	0.999481	0.287834	0.494909
orf19.6902	C7_01200C_A	DBP7	0.784183	0.0363122	0.147871	0.999481	0.368168	0.369015
orf19.5845	CR_05570C_A	RNR3	0.784089	0.26824	0.162466	0.999481	1.44363	0.144781
orf19.1938	C5_01310W_A	C5_01310W_A	0.78286	0.0922696	0.173975	0.999481	0.102433	0.879246
orf19.7566	CR_09920W_A	CR_09920W_A	0.781654	0.445922	1.11378	0.999481	0.415172	0.743615
orf19.3080	C4_07220C_A	C4_07220C_A	0.780823	0.0607218	-0.000743816	0.99972	-0.0448568	0.945319
orf19.1133	C1_03710C_A	MSB1	0.780358	0.0304095	0.186693	0.999481	0.409975	0.291386
orf19.144	C2_04640C_A	SNU114	0.780025	0.0493899	0.0185887	0.999481	0.69092	0.176455
orf19.5259	C1_12060C_A	C1_12060C_A	0.779369	0.16439	0.168218	0.999481	0.127201	0.880088
orf19.4217	C5_02130W_A	C5_02130W_A	0.778062	0.292043	-0.126023	0.999481	-0.454885	0.679689
orf19.4479	C1_04040C_A	C1_04040C_A	0.77705	0.0477339	0.134436	0.999481	0.498243	0.274596
orf19.3087.1	C4_07170C_A	C4_07170C_A	0.776268	0.0856108	-0.194956	0.999481	0.515033	0.359542
orf19.6291	CR_07600W_A	CR_07600W_A	0.775558	0.0293107	-0.100537	0.999481	0.485161	0.223399
orf19.6053	C1_00550W_A	CIS2	0.775556	0.0570918	0.146067	0.999481	0.546302	0.251737
orf19.7367	C3_05870C_A	UBP1	0.774465	0.0238999	-0.0370312	0.999481	0.393087	0.274977
orf19.1900	C2_07360W_A	C2_07360W_A	0.774207	0.0714283	-0.0480361	0.999481	0.602691	0.251737
orf19.3635	C2_08450W_A	C2_08450W_A	0.773897	0.0314407	0.457265	0.999481	0.354586	0.348399
orf19.3609	C2_08670C_A	UTP15	0.773863	0.0349432	-0.0760432	0.999481	0.540852	0.210137
orf19.1507	C2_01950C_A	AMN1	0.773807	0.121969	0.26144	0.999481	0.59882	0.325364
orf19.5436	C3_00330W_A	UTP8	0.773467	0.0710246	-0.193698	0.999481	0.613676	0.249501
orf19.4451	C1_07140C_A	RIA1	0.773357	0.0259697	0.0573749	0.999481	0.193266	0.60083
orf19.4056	C1_05140W_A	BRG1	0.772762	0.189249	1.04622	0.999481	0.0656234	0.945733
orf19.5502	C7_03760W_A	C7_03760W_A	0.772209	0.157357	0.54555	0.999481	0.131738	0.862287
orf19.2054	C2_00720C_A	FGR15	0.771889	0.0301103	-0.0450379	0.999481	0.352861	0.358727
orf19.2712	C4_02830C_A	HCA4	0.771603	0.0590287	0.0752441	0.999481	0.445742	0.354085
orf19.7159	C7_04150W_A	C7_04150W_A	0.771335	0.01908	-0.0891328	0.999481	0.211776	0.515958
orf19.5232	C1_12310C_A	CSI2	0.770399	0.0518006	0.0857708	0.999481	0.383669	0.394432
orf19.6877	C2_05660W_A	PNG2	0.770274	0.138508	-0.112022	0.999481	0.355811	0.594272
orf19.3139	C4_06710W_A	C4_06710W_A	0.768866	0.2348	0.0377657	0.999481	-0.189333	0.845327
orf19.946	C5_00430W_A	MET14	0.768596	0.42385	-1.23817	0.999481	1.67856	0.221509
orf19.7574	CR_09990W_A	CR_09990W_A	0.76825	0.0231759	0.0445893	0.999481	0.347662	0.319462
orf19.7190	C7_03910W_A	OGG1	0.768214	0.0207701	0.292229	0.999481	0.125364	0.724318
orf19.1753	C2_10270W_A	PUS7	0.767809	0.0264226	0.268674	0.999481	0.578738	0.161768
orf19.5989	C3_05150W_A	C3_05150W_A	0.767712	0.0183297	0.081834	0.999481	0.35386	0.267539
orf19.413.1	C1_05510C_A	RPS27A	0.767634	0.189536	0.114365	0.999481	-0.0600969	0.953017
orf19.5126	C7_03270W_A	C7_03270W_A	0.767439	0.0155292	0.13092	0.999481	0.442269	0.176184
orf19.7652	CR_10660W_A	CKA1	0.767103	0.0342127	0.0514349	0.999481	0.271715	0.487284
orf19.513	CR_04250W_A	CR_04250W_A	0.766837	0.507256	1.22114	0.999481	-0.764086	0.592096
orf19.7489	CR_00440C_A	LRG1	0.766717	0.0428525	0.224909	0.999481	0.450738	0.294682
orf19.7601	CR_10260W_A	CR_10260W_A	0.765246	0.0638239	0.0237765	0.999481	1.23356	0.0388408
orf19.2769	C4_02340W_A	C4_02340W_A	0.765216	0.29351	-1.10585	0.999481	0.760999	0.450848
orf19.4906	C1_10350C_A	C1_10350C_A	0.764533	0.0196499	0.225734	0.999481	0.0823087	0.815233
orf19.675	C1_11270W_A	C1_11270W_A	0.764348	0.221522	-0.24065	0.999481	0.247684	0.782363
orf19.3448	C6_01360W_A	C6_01360W_A	0.763855	0.0317104	0.151438	0.999481	0.147829	0.724318
orf19.6672	C5_03600W_A	MDJ1	0.763397	0.0584399	0.299483	0.999481	0.506467	0.286305
orf19.3190	C5_01830C_A	HAL9	0.763389	0.0244776	0.362	0.999481	0.07042	0.860955
orf19.3170	C5_02010C_A	C5_02010C_A	0.761487	0.0342127	0.0751894	0.999481	0.332809	0.390184
orf19.5175	C7_02860C_A	C7_02860C_A	0.761429	0.0283261	0.0274615	0.999481	0.303763	0.403648
orf19.7619	CR_10420W_A	CR_10420W_A	0.761356	0.0214226	0.535105	0.964255	0.0596349	0.874329
orf19.7356	C3_05750C_A	C3_05750C_A	0.759526	0.398847	2.23261	0.542357	-2.32615	0.0868716
orf19.2580	CR_01800C_A	HST2	0.758677	0.118532	0.0166232	0.999481	-0.0249369	0.976414
orf19.1047	C1_04130W_A	ERB1	0.757916	0.0403264	0.0871124	0.999481	0.485841	0.251899
orf19.3840	C4_04460C_A	C4_04460C_A	0.756685	0.139974	-0.179649	0.999481	0.661061	0.311547
orf19.2213	C2_07690W_A	C2_07690W_A	0.753599	0.066379	0.0108276	0.999481	0.31137	0.526338
orf19.7053	C7_00660W_A	GAC1	0.752972	0.217848	0.436872	0.999481	-0.280612	0.741681
orf19.2990	C1_02990C_A	XOG1	0.752872	0.505663	0.272049	0.999481	0.71971	0.608321
orf19.2514	C3_01120W_A	C3_01120W_A	0.752729	0.0495544	0.11469	0.999481	0.12043	0.803087
orf19.5784	C2_03120W_A	AMO1	0.75113	0.626227	0.632639	0.999481	-0.103877	0.967874
orf19.7610	CR_10340W_A	PTP3	0.751011	0.0334049	0.469738	0.999481	0.00475107	0.991209
orf19.1849	CR_06840W_A	CR_06840W_A	0.750211	0.0502602	0.0206029	0.999481	0.418782	0.344135
orf19.4455	C1_07130C_A	C1_07130C_A	0.749868	0.0582812	0.0307843	0.999481	0.43133	0.352353
orf19.6803	C3_06980W_A	HUT1	0.747983	0.0801085	0.317748	0.999481	0.306274	0.532266
orf19.665	C1_11380W_A	NEP1	0.747116	0.0321353	0.0679803	0.999481	0.271277	0.468418
orf19.879	C2_03420C_A	C2_03420C_A	0.746691	0.030363	0.0785255	0.999481	0.021025	0.967874
orf19.789	C4_03940C_A	PYC2	0.745773	0.288285	0.472452	0.999481	0.017201	0.989855
orf19.6387	CR_08250C_A	HSP104	0.744838	0.357501	-0.0850607	0.999481	0.152825	0.905169
orf19.2726	C4_02720C_A	C4_02720C_A	0.743213	0.0195035	0.0630968	0.999481	1.21777	0.00346972
orf19.2488	C1_05640C_A	FAL1	0.741398	0.0342127	-0.0125256	0.999481	0.362892	0.344936
orf19.1826	C1_06230C_A	MDM34	0.740978	0.150308	0.653805	0.999481	-0.139533	0.841137
orf19.2003	C2_01210C_A	HNM1	0.739355	0.252538	0.726881	0.999481	-0.749432	0.37149
orf19.5850	CR_05520W_A	NOC2	0.738836	0.0430409	0.208883	0.999481	0.308474	0.449955
orf19.3015	C1_03230C_A	ARX1	0.73793	0.0577693	0.278002	0.999481	0.212743	0.649299
orf19.488	CR_04050C_A	MEX67	0.737203	0.0552292	-0.0503761	0.999481	0.410953	0.359542
orf19.6366	CR_08080W_A	CR_08080W_A	0.737001	0.510114	0.525795	0.999481	0.104594	0.954932
orf19.1791	C4_05330C_A	C4_05330C_A	0.736032	0.0316694	0.159587	0.999481	0.283468	0.439005
orf19.2891	C4_06430C_A	C4_06430C_A	0.735476	0.0386704	0.489618	0.999481	-0.0399628	0.934838
orf19.7062	C7_00570W_A	RPA135	0.735208	0.0425429	0.180004	0.999481	0.374781	0.359305
orf19.4885	C1_10160W_A	MIR1	0.735122	0.0905652	0.588343	0.999481	-0.298589	0.578089
orf19.4602	C4_01900C_A	MDH1-1	0.735075	0.142746	0.30281	0.999481	-0.158033	0.823061
orf19.4370	CR_03710C_A	CR_03710C_A	0.732992	0.0566077	-0.0333044	0.999481	0.663627	0.18423
orf19.1296	C2_06650C_A	C2_06650C_A	0.732377	0.0431005	0.0737754	0.999481	0.480406	0.246589
orf19.5213	C2_05910W_A	C2_05910W_A	0.731545	0.0185777	0.0845034	0.999481	0.421568	0.198118
orf19.4656	C4_01310W_A	C4_01310W_A	0.731401	0.0297305	0.410215	0.999481	0.0754172	0.848414
orf19.5785	C2_03110W_A	C2_03110W_A	0.731345	0.218341	-0.483307	0.999481	1.38699	0.128042
orf19.308	C3_03110W_A	C3_03110W_A	0.730057	0.0323516	0.195471	0.999481	0.468415	0.218834
orf19.1828	C1_06210W_A	BUD16	0.729996	0.0652581	0.0818304	0.999481	0.346874	0.450848
orf19.427	C1_05380C_A	C1_05380C_A	0.729053	0.0117631	0.123945	0.999481	0.277569	0.257641
orf19.2930	C1_02430C_A	C1_02430C_A	0.727955	0.0155519	0.102317	0.999481	0.133531	0.63338
orf19.4733	C1_08750W_A	YMC2	0.72723	0.357605	-0.192867	0.999481	0.83415	0.41699
orf19.6818	C3_06830C_A	C3_06830C_A	0.726927	0.0980963	-0.133604	0.999481	0.610429	0.267353
orf19.1026.1	C1_03840W_A	C1_03840W_A	0.725608	0.0434638	0.156664	0.999481	0.52706	0.210432
orf19.6236	C1_06740C_A	NOP6	0.724754	0.0655928	0.0983442	0.999481	0.443187	0.340334
orf19.2675	C4_03150W_A	C4_03150W_A	0.724034	0.013386	-0.0168096	0.999481	0.306217	0.247167
orf19.7267	C1_14490C_A	SAM35	0.723639	0.166287	-0.0461636	0.999481	-0.198467	0.794699
orf19.3305	C1_01170C_A	ZCF17	0.723601	0.0601522	0.248485	0.999481	0.714033	0.156056
orf19.1934	C5_01340W_A	HST3	0.723492	0.219539	0.131943	0.999481	0.491551	0.512284
orf19.96	C6_00950C_A	TOP1	0.721902	0.0239339	-0.0701166	0.999481	0.656357	0.101549
orf19.500	CR_04160C_A	CR_04160C_A	0.72158	0.0352873	0.170496	0.999481	0.324155	0.38267
orf19.6981	C3_05430W_A	C3_05430W_A	0.719558	0.0966879	0.0273158	0.999481	0.37046	0.478449
orf19.4629	C4_01560C_A	C4_01560C_A	0.719381	0.0396073	0.123129	0.999481	0.551818	0.187502
orf19.6133	CR_07360W_A	PIF1	0.71922	0.0343359	0.0312282	0.999481	0.306247	0.404061
orf19.2434	C1_06110C_A	NPL4	0.718754	0.192031	0.0824836	0.999481	-0.0666883	0.943121
orf19.6382	CR_08200C_A	CR_08200C_A	0.718183	0.041965	0.114852	0.999481	0.160114	0.703589
orf19.1360	C2_09920W_A	C2_09920W_A	0.717688	0.114201	0.196482	0.999481	0.586549	0.288345
snR75	C4_01600C_A	C4_01600C_A	0.717539	0.390494	0.188328	0.999481	1.33476	0.213654
orf19.1589.1	C2_02640C_A	C2_02640C_A	0.717453	0.342668	-0.56679	0.999481	1.11151	0.285384
orf19.3854	CR_06040W_A	CR_06040W_A	0.715574	0.0521897	-0.118973	0.999481	0.14905	0.747995
orf19.6324	C6_00130C_A	VID27	0.715189	0.0817918	0.252776	0.999481	-0.0794429	0.893002
orf19.4835	C1_09710C_A	C1_09710C_A	0.715	0.0432536	-0.0544291	0.999481	0.387685	0.336231
orf19.5912	C3_04560W_A	MAK21	0.714893	0.0296481	0.274186	0.999481	0.309442	0.378394
orf19.2115	C2_00170C_A	C2_00170C_A	0.71465	0.0351092	0.136975	0.999481	0.147289	0.713414
orf19.5242	C1_12220W_A	CDC6	0.713813	0.197526	-0.106318	0.999481	0.3403	0.646324
orf19.6727	C3_07620C_A	RIT1	0.713647	0.0505188	0.0806044	0.999481	0.838079	0.092918
orf19.5026	C1_13880C_A	C1_13880C_A	0.710718	0.0545154	0.425344	0.999481	-0.035795	0.949595
orf19.1339	C7_03360W_A	CPY1	0.710656	0.126	0.140472	0.999481	0.272538	0.648499
orf19.5510	C6_02430W_A	C6_02430W_A	0.710251	0.0192929	0.0486531	0.999481	0.605488	0.0969983
orf19.7063	C7_00560C_A	THG1	0.709703	0.0636106	0.0922469	0.999481	0.560973	0.224816
orf19.5607	C6_03200W_A	C6_03200W_A	0.709655	0.0570583	0.0559368	0.999481	0.753289	0.138632
orf19.7257	C1_14400C_A	MLH3	0.708684	0.0488405	0.0554137	0.999481	0.022437	0.968647
snR48	C2_02080W_A	C2_02080W_A	0.708552	0.281672	0.310109	0.999481	0.758435	0.346097
orf19.4494	C2_04560W_A	KTR2	0.707923	0.064029	0.116643	0.999481	0.215849	0.636875
orf19.855	C2_03630W_A	C2_03630W_A	0.707498	0.358101	0.578986	0.999481	-1.54045	0.194551
orf19.2711	C4_02850W_A	C4_02850W_A	0.706954	0.0250002	0.0845872	0.999481	0.355923	0.282357
orf19.7202	C7_03800W_A	C7_03800W_A	0.706	0.0303411	0.304379	0.999481	0.287997	0.395997
orf19.172	CR_02520W_A	RPC19	0.705882	0.0807047	0.295668	0.999481	0.381186	0.422682
orf19.4706	C4_00860C_A	C4_00860C_A	0.705845	0.419656	0.0459351	0.999481	0.0618348	0.968647
orf19.2517	CR_01340W_A	CR_01340W_A	0.70577	0.27827	0.892819	0.999481	-0.303084	0.726717
orf19.932	C5_00570W_A	C5_00570W_A	0.705102	0.0275299	0.0265752	0.999481	0.543479	0.161768
orf19.6494	C7_02200W_A	WHI3	0.704979	0.0309715	0.2928	0.999481	0.190038	0.585808
orf19.6972	C3_05350C_A	SMI1B	0.70354	0.0523033	0.303475	0.999481	0.137497	0.756783
orf19.3845	C4_04420W_A	FGR3	0.702695	0.110731	-0.040622	0.999481	0.0976527	0.882532
orf19.1623	C3_02220W_A	CAP1	0.702219	0.16173	-0.0208995	0.999481	0.228055	0.74042
orf19.5277	C1_11900C_A	C1_11900C_A	0.701665	0.0657931	0.0401883	0.999481	0.471047	0.29668
orf19.7539	CR_00050W_A	INO2	0.701269	0.086354	0.426092	0.999481	-0.475335	0.344936
orf19.4907	C1_10360C_A	C1_10360C_A	0.701003	0.382054	-0.254976	0.999481	0.323617	0.779609
orf19.7306	CR_09100C_A	CR_09100C_A	0.699292	0.199281	0.365899	0.999481	1.06556	0.156056
orf19.4151	C5_01570C_A	SPO1	0.698355	0.484793	0.371469	0.999481	0.0993657	0.953549
orf19.4884	C1_10150W_A	WOR1	0.697591	0.277473	0.188511	0.999481	-0.246656	0.794414
orf19.7554	CR_09830W_A	CR_09830W_A	0.697275	0.103525	-0.0828715	0.999481	0.139698	0.814598
orf19.3418	C6_01680C_A	C6_01680C_A	0.697163	0.213963	0.249773	0.999481	-0.0972005	0.913856
orf19.3351	C1_01610C_A	C1_01610C_A	0.696866	0.430385	0.293268	0.999481	-0.112022	0.940192
orf19.1326	C4_03530W_A	C4_03530W_A	0.696392	0.117026	0.010875	0.999481	0.337617	0.536418
orf19.5541	C6_02690C_A	C6_02690C_A	0.696282	0.0376604	0.254787	0.999481	0.396161	0.289623
orf19.6059	C1_00490C_A	TTR1	0.695402	0.289149	0.0329961	0.999481	0.498581	0.562553
orf19.3901	C5_04180W_A	C5_04180W_A	0.693213	0.485857	-0.131438	0.999481	-0.39633	0.79729
orf19.199	C2_09050C_A	C2_09050C_A	0.693176	0.0394697	0.575986	0.999481	0.128856	0.739882
orf19.2649	C5_03310C_A	PCL1	0.692508	0.39299	0.342053	0.999481	0.7679	0.429588
orf19.1393	C2_09610W_A	C2_09610W_A	0.692388	0.0334345	0.437187	0.999481	0.128566	0.726358
orf19.4923.1	C1_12940C_A	C1_12940C_A	0.691813	0.308111	-0.0557616	0.999481	-0.276292	0.787306
orf19.685	C6_01930W_A	YHM1	0.691648	0.1314	0.740486	0.999481	0.167823	0.786837
orf19.272	C3_02810C_A	FAA21	0.691259	0.0635635	0.504498	0.999481	-1.1632	0.044438
orf19.3666	C1_02090C_A	C1_02090C_A	0.690509	0.0914028	-0.0687212	0.999481	0.594918	0.246589
orf19.5792	C2_03070C_A	SMP3	0.690374	0.0530222	0.392736	0.999481	0.406867	0.297999
orf19.5884	C3_04370C_A	C3_04370C_A	0.688166	0.0370188	-0.0151608	0.999481	0.445584	0.238335
orf19.3751	CR_02210W_A	CR_02210W_A	0.688116	0.249482	0.403041	0.999481	0.545842	0.468338
orf19.7389	C3_06080W_A	REV3	0.68724	0.0792094	0.245395	0.999481	0.362499	0.426567
orf19.7422	C3_06370C_A	C3_06370C_A	0.686999	0.104123	0.237199	0.999481	0.0682179	0.915561
orf19.1735	CR_04710W_A	CR_04710W_A	0.686688	0.198182	-0.124586	0.999481	0.619411	0.369053
orf19.7427	C3_06420C_A	C3_06420C_A	0.6862	0.179681	-0.0445656	0.999481	0.673483	0.302319
orf19.3018	C1_03250C_A	SPP1	0.684847	0.0549153	0.0495865	0.999481	0.121892	0.789472
orf19.6871	C2_05580W_A	C2_05580W_A	0.684262	0.0183297	0.279832	0.999481	0.116868	0.687733
orf19.1747	C2_10310C_A	KIP2	0.684206	0.143823	-0.0254465	0.999481	0.606561	0.302319
orf19.2528	CR_01420W_A	CR_01420W_A	0.683596	0.142937	-0.15251	0.999481	0.542405	0.359042
orf19.1509	C2_01970C_A	ROD1	0.68322	0.0196594	-0.0279039	0.999481	0.601755	0.0923741
orf19.2435	C1_06100C_A	MSI3	0.683206	0.0343864	0.159567	0.999481	0.196197	0.583302
orf19.708	CR_06740W_A	CR_06740W_A	0.681496	0.142937	0.0196814	0.999481	0.408994	0.478328
orf19.4508	C2_04440W_A	C2_04440W_A	0.68114	0.401093	0.264169	0.999481	-0.726886	0.514188
orf19.6694	C7_03620C_A	C7_03620C_A	0.680427	0.0448744	0.205322	0.999481	0.2197	0.56073
tV(UAC)1	C2_10490C_A	tV(UAC)1	0.680405	0.268723	0.535179	0.999481	0.808028	0.277012
orf19.6453	C7_02560W_A	C7_02560W_A	0.680396	0.0188352	0.0824581	0.999481	0.361289	0.220837
orf19.568	C5_00700C_A	SPE2	0.679897	0.110402	0.302583	0.999481	0.420677	0.4151
orf19.501	CR_04170W_A	CR_04170W_A	0.679472	0.0428142	0.240203	0.999481	0.257029	0.492767
orf19.58	C1_05050C_A	RRP6	0.679424	0.0349432	0.125953	0.999481	0.418672	0.251737
orf19.7406	C3_06260C_A	C3_06260C_A	0.678909	0.0463147	-0.0857792	0.999481	0.250453	0.523468
orf19.1168	C1_11520C_A	ZCF3	0.678304	0.168674	-0.230086	0.999481	0.680304	0.287987
orf19.3631	C2_08470C_A	STN1	0.677364	0.0761121	-0.00782608	0.999481	0.307885	0.50227
orf19.529.1	CR_04400W_A	CR_04400W_A	0.676966	0.158035	0.152007	0.999481	0.245331	0.702989
orf19.3499	C6_02100W_A	C6_02100W_A	0.676591	0.647333	0.0819393	0.999481	-1.34307	0.521052
orf19.3019	C1_03260W_A	C1_03260W_A	0.676415	0.0927667	-0.123169	0.999481	0.37706	0.446118
orf19.4092	C2_09310C_A	C2_09310C_A	0.676194	0.153745	-0.155557	0.999481	0.408926	0.500505
orf19.2167	C2_08180C_A	C2_08180C_A	0.674796	0.0742684	0.0453005	0.999481	0.451339	0.325501
orf19.1409	C4_04370C_A	VAC7	0.674739	0.105649	-0.0631848	0.999481	0.370525	0.469584
orf19.3255	CR_01010W_A	TEN1	0.674089	0.266464	-0.0498582	0.999481	0.909504	0.251737
orf19.3676	C1_02190W_A	ABP140	0.673389	0.0735656	0.0207192	0.999481	0.318106	0.473194
orf19.2633	CR_07730W_A	HGT14	0.673288	0.346081	0.933912	0.999481	0.337071	0.688387
orf19.2703	C4_02920W_A	C4_02920W_A	0.672847	0.197778	0.112848	0.999481	0.172404	0.814598
orf19.2563	CR_01700C_A	CR_01700C_A	0.671639	0.0404744	-0.0521738	0.999481	0.248268	0.494557
orf19.7298	CR_09020C_A	CHS2	0.671351	0.0245848	0.194941	0.999481	0.252468	0.404061
orf19.7153	C7_04200C_A	C7_04200C_A	0.671252	0.0308818	0.0897186	0.999481	0.447186	0.213437
orf19.7013	C7_01010W_A	C7_01010W_A	0.670811	0.217139	0.224818	0.999481	-0.0549632	0.953549
orf19.2180	C2_08020C_A	C2_08020C_A	0.670237	0.027757	0.0314259	0.999481	0.30777	0.340074
orf19.6385	CR_08210C_A	ACO1	0.669888	0.214074	0.566209	0.999481	-1.37711	0.102447
orf19.6242	C1_06690W_A	CYK3	0.66917	0.122621	0.441704	0.999481	0.278057	0.592098
orf19.1839	C1_10670C_A	RPA190	0.669056	0.0590617	0.174922	0.999481	0.43374	0.302491
orf19.3415	C6_01710C_A	PTK2	0.667347	0.0169393	0.175642	0.999481	-0.027512	0.935003
orf19.5585	C6_03030W_A	SAP5	0.667077	0.134256	0.0142223	0.999481	-0.380322	0.51866
orf19.4374	CR_03750C_A	PRP42	0.666944	0.0801085	-0.192614	0.999481	0.448435	0.340334
orf19.6126	CR_07420W_A	KGD2	0.666734	0.214997	0.450641	0.999481	-0.663158	0.344424
orf19.4188	C4_00540C_A	NMD5	0.666472	0.0468469	-0.00616205	0.999481	0.529064	0.202427
orf19.7215	C1_14080W_A	C1_14080W_A	0.66536	0.0406511	0.0443973	0.999481	0.56808	0.171511
orf19.4306	C5_02820C_A	C5_02820C_A	0.664302	0.134183	0.13153	0.999481	0.0852381	0.898025
orf19.2962	C1_02730W_A	C1_02730W_A	0.664263	0.0915126	0.30897	0.999481	-0.882979	0.140569
orf19.6766	C3_07300W_A	NOP13	0.664204	0.076905	0.172986	0.999481	0.366098	0.409475
orf19.7521	CR_00140W_A	REP1	0.663453	0.0563859	0.503823	0.999481	-0.263699	0.498299
orf19.5368	C2_10850C_A	C2_10850C_A	0.663408	0.0694247	-0.217895	0.999481	0.0946265	0.850401
orf19.1117	C5_03770C_A	C5_03770C_A	0.663334	0.575571	1.7156	0.999481	-0.445199	0.74042
orf19.1026	C1_03830C_A	C1_03830C_A	0.662984	0.0387823	-0.036647	0.999481	0.37027	0.300814
orf19.5377	C3_00780W_A	HOS2	0.66281	0.0627325	0.0458271	0.999481	0.352451	0.392731
orf19.939	C5_00500W_A	NAM7	0.662198	0.0691361	-0.123121	0.999481	0.748631	0.142459
orf19.2971	C1_02830W_A	C1_02830W_A	0.662106	0.0457917	-0.0666037	0.999481	0.479997	0.224816
orf19.1232	C1_07700C_A	VRG4	0.661965	0.0921668	0.0635931	0.999481	0.624143	0.220837
orf19.5251	C1_12130C_A	ZCF30	0.66135	0.0570918	0.224936	0.999481	0.237242	0.544794
orf19.1697	C3_01520C_A	C3_01520C_A	0.65931	0.306271	-0.254372	0.999481	0.668016	0.428172
orf19.5885	C3_04380C_A	C3_04380C_A	0.658939	0.0276305	0.0833049	0.999481	0.54793	0.140332
orf19.5280	C1_11870W_A	MUP1	0.658318	0.1943	-0.269849	0.999481	1.56811	0.0583031
orf19.6487	C7_02260W_A	C7_02260W_A	0.657894	0.582246	0.402887	0.999481	0.801986	0.576663
orf19.1281	C5_04080C_A	C5_04080C_A	0.657732	0.0288592	0.00715978	0.999481	0.405213	0.224816
orf19.6165	C3_00880W_A	KGD1	0.65737	0.149896	0.392218	0.999481	-0.124426	0.850726
orf19.6515	C7_02030W_A	HSP90	0.656962	0.12473	0.010441	0.999481	0.0929176	0.883541
orf19.2315	C1_10990C_A	RTG3	0.65693	0.0502439	-0.156242	0.999481	0.515734	0.213437
orf19.3724	CR_02420W_A	CR_02420W_A	0.656825	0.0509961	0.0362271	0.999481	0.445066	0.257936
orf19.4282	C5_02650C_A	IFH1	0.655268	0.142937	-0.0798808	0.999481	0.672416	0.250268
orf19.6693	C7_03610C_A	C7_03610C_A	0.655178	0.0240898	0.11837	0.999481	0.258958	0.38267
orf19.7401	C3_06310C_A	ISW2	0.653324	0.0801085	0.146171	0.999481	0.618443	0.200189
orf19.2165	C2_08200W_A	C2_08200W_A	0.653217	0.189249	0.0358128	0.999481	1.74917	0.0307686
orf19.2736	C4_02630C_A	HFL2	0.65288	0.0363122	0.0839672	0.999481	0.43584	0.223171
orf19.5809	C2_02950W_A	C2_02950W_A	0.650933	0.1953	-0.274926	0.999481	0.661092	0.31873
orf19.7397	C3_06150W_A	C3_06150W_A	0.65087	0.0296256	0.0734744	0.999481	0.319127	0.317455
orf19.2996	C1_03050W_A	C1_03050W_A	0.64823	0.0345151	-0.0592807	0.999481	0.427524	0.224816
orf19.169	CR_02540W_A	CHO2	0.64747	0.0882256	0.393154	0.999481	0.347243	0.440564
orf19.4880	C1_10110W_A	C1_10110W_A	0.647221	0.0781912	-0.299067	0.999481	0.623721	0.202922
orf19.1531	C2_02150C_A	C2_02150C_A	0.647145	0.01908	0.062342	0.999481	0.327481	0.241505
orf19.6442	CR_08660W_A	PRP8	0.647048	0.0603383	-0.0370662	0.999481	0.547091	0.209378
orf19.6355	C1_12680W_A	C1_12680W_A	0.646963	0.072476	-0.0234511	0.999481	0.459874	0.293577
orf19.3547	C2_05160C_A	C2_05160C_A	0.64682	0.076905	0.216415	0.999481	0.299225	0.493797
orf19.304	C3_03070W_A	C3_03070W_A	0.646572	0.0950591	0.20215	0.999481	0.460405	0.323141
orf19.4575	C4_02160C_A	C4_02160C_A	0.646387	0.0585974	0.424136	0.999481	0.370884	0.335985
orf19.5823	C2_02830C_A	SGT2	0.645169	0.208425	-0.0840452	0.999481	-0.104786	0.893766
orf19.3548.1	C2_05180W_A	WH11	0.644982	0.49062	-0.299512	0.999481	-0.0892596	0.957277
orf19.7344	CR_09490W_A	CR_09490W_A	0.644795	0.063461	-0.158511	0.999481	0.702843	0.142459
orf19.6984	C3_05460W_A	C3_05460W_A	0.64476	0.0342127	0.201555	0.999481	0.216505	0.509878
orf19.2237.1	C2_06850W_A	C2_06850W_A	0.644645	0.0777872	0.00320278	0.999481	0.526595	0.242677
orf19.4814	C1_09500W_A	C1_09500W_A	0.64452	0.464781	-0.297044	0.999481	-0.172277	0.909269
orf19.5094	C1_08170C_A	BUL1	0.643522	0.461507	-0.456763	0.999481	-0.0542743	0.974003
orf19.4278	C5_02620C_A	C5_02620C_A	0.643489	0.0466341	0.205923	0.999481	0.485777	0.212377
orf19.1942	C5_01270W_A	SGE1	0.643484	0.164704	0.282678	0.999481	0.894005	0.165888
orf19.3942	C5_04580C_A	C5_04580C_A	0.643218	0.181178	-0.314241	0.999481	0.531107	0.397247
orf19.1832	C1_10610W_A	FCY23	0.642888	0.0932086	0.0765028	0.999481	0.393842	0.390857
orf19.2713	C4_02820W_A	C4_02820W_A	0.6423	0.40015	-0.659558	0.999481	0.634153	0.551581
orf19.6979	C3_05410W_A	C3_05410W_A	0.642016	0.0432758	0.142098	0.999481	0.140101	0.717173
orf19.3091	C4_07130W_A	C4_07130W_A	0.641177	0.0905652	-0.0624103	0.999481	0.356575	0.436547
orf19.4870	C1_10030W_A	DBP3	0.640685	0.069028	0.0816074	0.999481	0.436521	0.302491
orf19.1308	C4_03700W_A	C4_03700W_A	0.640489	0.127566	0.805949	0.999481	-0.478442	0.359542
orf19.564	C2_09370C_A	KAR3	0.639669	0.163251	-0.20635	0.999481	0.524144	0.375111
orf19.6742	C3_07460W_A	C3_07460W_A	0.639517	0.016975	0.171263	0.999481	0.267657	0.289676
orf19.6463	C7_02460C_A	C7_02460C_A	0.638004	0.0646475	-0.0501475	0.999481	0.265921	0.515681
orf19.1327	C4_03520C_A	RBT1	0.636962	0.0487561	0.440079	0.999481	-1.47455	0.00708022
orf19.7223	C1_14160W_A	C1_14160W_A	0.635973	0.0706355	-0.0870753	0.999481	0.311487	0.456682
orf19.2057	C2_00700W_A	C2_00700W_A	0.635709	0.187927	0.443426	0.999481	-0.0421139	0.960408
orf19.3535	C2_05040C_A	C2_05040C_A	0.635135	0.0354342	0.0466052	0.999481	0.402436	0.241349
orf19.6166	C3_00890C_A	C3_00890C_A	0.634227	0.108876	0.226222	0.999481	0.298823	0.526503
orf19.7327	CR_09320C_A	PHO88	0.633589	0.0199458	0.163569	0.999481	0.252123	0.352852
orf19.3972	C5_04860C_A	C5_04860C_A	0.633202	0.104558	0.451938	0.999481	0.463011	0.302491
orf19.7550	CR_09780C_A	IFA14	0.632921	0.50754	0.06649	0.999481	-1.04601	0.44143
orf19.6773	C3_07260C_A	ECM29	0.631865	0.274993	0.0686043	0.999481	-0.189229	0.823061
orf19.6817	C3_06850W_A	FCR1	0.631695	0.309169	-0.0842971	0.999481	0.448254	0.585925
orf19.5495	C2_06320W_A	C2_06320W_A	0.630578	0.124755	-0.0963983	0.999481	0.456789	0.373656
orf19.1533	C2_02170W_A	C2_02170W_A	0.630318	0.0428792	0.026263	0.999481	0.420817	0.246589
orf19.5977	C3_05070W_A	CEM1	0.629212	0.0264536	0.32917	0.999481	0.104585	0.733404
orf19.2170	C2_08140C_A	PHM7	0.629189	0.197778	0.66581	0.999481	0.30882	0.630558
orf19.6736	C3_07550C_A	C3_07550C_A	0.628136	0.0679003	0.244973	0.999481	0.741016	0.114465
orf19.6266	C1_06440C_A	C1_06440C_A	0.628008	0.0440125	0.0956495	0.999481	0.767842	0.0750142
orf19.1643	C3_02030W_A	C3_02030W_A	0.627088	0.0251283	0.0951053	0.999481	0.525521	0.127157
orf19.2933	C1_02440C_A	C1_02440C_A	0.626893	0.201247	-0.0491268	0.999481	-0.162214	0.823282
orf19.7042	C7_00770W_A	C7_00770W_A	0.62687	0.690528	0.117991	0.999481	0.146663	0.954932
orf19.245	C3_02560W_A	DDC1	0.626608	0.0538975	0.133684	0.999481	0.228418	0.535724
snR190	C1_08960W_A	C1_08960W_A	0.626465	0.240941	0.530261	0.999481	0.554824	0.377091
orf19.5487	C2_06250C_A	CDC46	0.625643	0.0176076	0.0697753	0.999481	0.161487	0.515681
orf19.5300	C4_04090C_A	C4_04090C_A	0.624985	0.0686309	0.060344	0.999481	0.263977	0.515689
orf19.991	C1_10480W_A	DJP1	0.624455	0.0211191	0.235001	0.999481	0.0792154	0.790383
orf19.1671	C3_01730C_A	UTR2	0.624053	0.0640923	0.320206	0.999481	-0.25935	0.515681
orf19.7517	CR_00180C_A	CHT1	0.623554	0.160402	0.270952	0.999481	0.00840696	0.990928
orf19.3998	C5_05060C_A	C5_05060C_A	0.622997	0.171348	0.0980455	0.999481	-0.631522	0.312958
orf19.512	CR_04240C_A	CR_04240C_A	0.622716	0.0388444	0.132297	0.999481	0.374812	0.270614
orf19.1361	C2_09900C_A	TIM23	0.621912	0.0425429	0.379397	0.999481	0.308439	0.369015
orf19.3941	C5_04570C_A	URA7	0.621326	0.0400058	0.00275354	0.999481	0.584393	0.140934
orf19.1927	C5_01390C_A	SNM1	0.621097	0.0473979	-0.157041	0.999481	1.27681	0.006349
orf19.1915	C2_00070C_A	MPP10	0.62063	0.066379	0.101497	0.999481	0.221892	0.58454
orf19.2973	C1_02850W_A	C1_02850W_A	0.620506	0.0905652	0.152455	0.999481	0.513078	0.255702
orf19.5198	C1_04390C_A	NOP4	0.620437	0.0934934	0.262339	0.999481	0.341655	0.448759
orf19.2447	C1_05980W_A	C1_05980W_A	0.619645	0.0369238	0.0322016	0.999481	0.231812	0.472211
orf19.2995	C1_03040W_A	C1_03040W_A	0.618396	0.148785	-0.0513211	0.999481	0.507264	0.348399
orf19.6444	CR_08680C_A	CR_08680C_A	0.61728	0.0256548	-0.0338613	0.999481	0.107187	0.7311
orf19.4578	C4_02130W_A	CYT2	0.617186	0.0909526	0.415119	0.999481	0.0774333	0.878131
snR8a	C1_11780W_A	C1_11780W_A	0.617111	0.385049	0.441506	0.999481	0.205247	0.836468
orf19.6342	C1_12800W_A	C1_12800W_A	0.617042	0.12506	0.105237	0.999481	0.123515	0.825578
orf19.6879	C2_05670C_A	C2_05670C_A	0.616573	0.144693	-0.173703	0.999481	0.505553	0.352203
orf19.6124	CR_07440W_A	ACE2	0.616151	0.076905	0.13136	0.999481	0.302017	0.466266
orf19.3732	CR_02370W_A	ERG25	0.614978	0.108876	0.38872	0.999481	0.297794	0.523468
orf19.6263	C1_06510C_A	C1_06510C_A	0.614804	0.110674	0.417393	0.999481	0.118446	0.820554
orf19.2177	C2_08090W_A	C2_08090W_A	0.614428	0.346392	0.208045	0.999481	2.79372	0.00462468
orf19.1693	C3_01530C_A	CAS4	0.613509	0.088373	-0.083009	0.999481	0.542418	0.234442
orf19.2728	C4_02700W_A	C4_02700W_A	0.613213	0.14069	0.21498	0.999481	-0.0168048	0.981321
orf19.2599	CR_01980C_A	CRC1	0.613135	0.0635171	0.549078	0.999481	-0.196928	0.614441
orf19.2917	C4_06210C_A	C4_06210C_A	0.611858	0.0593195	0.00886284	0.999481	0.422988	0.27616
orf19.927	C5_00620W_A	C5_00620W_A	0.61185	0.0927667	-0.0682165	0.999481	0.341005	0.443656
orf19.7410	C3_06230W_A	CYM1	0.611243	0.18105	0.269636	0.999481	0.0722256	0.920159
orf19.2340	C1_10790W_A	CDC48	0.610977	0.230898	0.0093632	0.999481	-0.156116	0.833512
orf19.1080	C6_04230W_A	C6_04230W_A	0.610545	0.438287	0.0380438	0.999481	-0.362358	0.75716
orf19.3300	C1_01110C_A	ZPR1	0.609925	0.0309715	-0.0164056	0.999481	0.401455	0.217934
orf19.7602	CR_10270C_A	AHA1	0.609838	0.182311	-0.02847	0.999481	0.22907	0.716563
orf19.2262	C2_07070W_A	C2_07070W_A	0.609634	0.549925	-0.0317956	0.999481	0.277808	0.854613
orf19.3023	C1_03290W_A	NGG1	0.607677	0.0626968	-0.0517832	0.999481	0.408316	0.29457
orf19.2784	C1_07610C_A	C1_07610C_A	0.607247	0.104123	0.264558	0.999481	-0.154894	0.75749
orf19.4190	C4_00520W_A	PAM18	0.60723	0.127134	0.500811	0.999481	0.186053	0.724318
orf19.5085	C1_08110W_A	C1_08110W_A	0.60663	0.044225	-0.0424058	0.999481	0.412164	0.246589
LSU-C2809	C6_02400W_A	C6_02400W_A	0.605845	0.285454	-0.188713	0.999481	0.562391	0.451876
orf19.3526	C2_04940C_A	ITR1	0.605574	0.181183	0.130371	0.999481	0.0635372	0.930763
orf19.4499	C2_04510W_A	RIM2	0.604928	0.0636453	0.310538	0.999481	0.747773	0.0972836
orf19.7646	CR_10630W_A	CR_10630W_A	0.604698	0.183967	-0.0292953	0.999481	0.363287	0.530821
orf19.7258	C1_14420W_A	DDI1	0.604686	0.356276	-0.0490837	0.999481	-0.336118	0.719522
orf19.3125	C4_06840W_A	C4_06840W_A	0.604567	0.191777	-0.197664	0.999481	0.4911	0.409661
orf19.4147	C5_01520C_A	GLR1	0.604387	0.086927	0.0748028	0.999481	0.554248	0.221262
orf19.234	C3_02460C_A	PHA2	0.604317	0.0317104	0.200517	0.999481	-0.0163961	0.968647
orf19.4626	C4_01670C_A	C4_01670C_A	0.601035	0.190462	0.190604	0.999481	-0.103869	0.881346
tS(CAG)1	C5_00360C_A	tS(CAG)1	0.600216	0.624132	0.362636	0.999481	0.53724	0.736114
orf19.3804	C4_04760C_A	C4_04760C_A	0.599284	0.0716384	0.174207	0.999481	0.57596	0.185334
orf19.2021	C2_01010W_A	HGT8	0.597999	0.138442	0.432878	0.999481	0.0875756	0.88467
orf19.1120	C5_03750W_A	FAV2	0.597324	0.556746	0.237768	0.999481	0.697279	0.576468
orf19.111	C6_01060C_A	CAN2	0.596806	0.644704	0.822171	0.999481	-1.62631	0.340334
orf19.6203	C1_07020C_A	PUT3	0.595696	0.0659251	-0.0932533	0.999481	0.303202	0.429983
orf19.3309	C1_01210W_A	C1_01210W_A	0.595588	0.377248	0.21132	0.999481	-0.271837	0.779858
orf19.1440.2	C4_03300C_A	C4_03300C_A	0.595517	0.241778	0.440721	0.999481	-0.0918474	0.905169
orf19.7494	CR_00390W_A	MMS22	0.595417	0.0165641	-0.0991757	0.999481	0.0083489	0.978524
orf19.5410	C3_00530C_A	C3_00530C_A	0.594483	0.156131	-0.0841733	0.999481	0.283752	0.602647
orf19.5383	C3_00720W_A	PMA1	0.59434	0.0922696	-0.028022	0.999481	0.550973	0.224882
orf19.1949	C5_01210W_A	VPS1	0.593305	0.126903	0.0855265	0.999481	-0.0348536	0.957743
orf19.6866	C2_05540C_A	C2_05540C_A	0.593189	0.0976863	-0.131766	0.999481	0.329206	0.453261
orf19.3512	CR_05430W_A	CSP1	0.592852	0.196313	0.322026	0.999481	0.0672607	0.926773
orf19.3292	C1_01040W_A	C1_01040W_A	0.592374	0.358671	0.001599	0.99972	-0.209732	0.830862
orf19.7119	C7_00050C_A	RAD3	0.591446	0.0954642	-0.0602035	0.999481	-0.0365917	0.949393
orf19.6958	C3_03630W_A	ECM18	0.591427	0.662862	0.967474	0.999481	-0.517885	0.769996
orf19.2875	C4_06590W_A	C4_06590W_A	0.590699	0.135012	0.0790065	0.999481	0.162649	0.76468
orf19.7358	C3_05770C_A	SAM50	0.590641	0.069028	0.00720407	0.999481	0.443845	0.256575
orf19.5910	C3_04540C_A	C3_04540C_A	0.590373	0.142937	0.0678683	0.999481	0.273951	0.592096
orf19.2504	C3_01000W_A	BMS1	0.590218	0.091233	0.123666	0.999481	0.434775	0.314557
orf19.4857	C1_09910C_A	C1_09910C_A	0.589716	0.384144	0.340125	0.999481	0.598788	0.464394
orf19.850	C2_03700W_A	C2_03700W_A	0.588349	0.111782	0.131269	0.999481	-0.12164	0.811944
snR31a	C1_09560C_A	C1_09560C_A	0.58826	0.338887	0.353547	0.999481	0.664733	0.378133
orf19.3589	C2_08820C_A	SPO11	0.587837	0.496734	0.585684	0.999481	0.958337	0.342377
orf19.2812	C3_03980C_A	C3_03980C_A	0.587704	0.22544	-0.0703371	0.999481	0.306093	0.635985
orf19.2260	C2_07040W_A	C2_07040W_A	0.5877	0.251748	-0.0992189	0.999481	0.621848	0.351094
orf19.4448	C1_07190W_A	SOG2	0.5876	0.029826	0.0113099	0.999481	0.111915	0.722244
orf19.6195	C1_07090C_A	C1_07090C_A	0.587591	0.0199458	0.0708711	0.999481	0.325222	0.219822
orf19.2594	CR_01950W_A	CR_01950W_A	0.584591	0.0509551	-0.00186588	0.999597	0.312504	0.367708
orf19.6014	C1_00900W_A	RRS1	0.584094	0.0932086	0.115605	0.999481	0.30719	0.465519
orf19.1341	C7_03340C_A	PRR2	0.58337	0.0706355	0.521633	0.999481	-0.512254	0.210432
NA	NA	ENSRNA049498973	0.582625	0.301123	0.0450972	0.999481	0.831355	0.254311
orf19.6953	C3_03660W_A	IRS4	0.58251	0.0606564	-0.106882	0.999481	0.349092	0.344936
orf19.7354	C3_05730C_A	LAC1	0.58228	0.191777	0.0545768	0.999481	0.478718	0.392842
orf19.5575	C6_02970C_A	C6_02970C_A	0.582122	0.0992267	0.194964	0.999481	0.218494	0.609434
orf19.4896	C1_10260C_A	RPA34	0.580472	0.0958302	0.00227715	0.999597	0.343917	0.41424
orf19.6789	C3_07110W_A	C3_07110W_A	0.580463	0.133728	-0.079623	0.999481	0.84395	0.132583
orf19.4820	C1_09570W_A	C1_09570W_A	0.580401	0.0456443	0.0838443	0.999481	0.494026	0.178729
orf19.345	C3_03470W_A	C3_03470W_A	0.580365	0.0801085	0.336936	0.999481	0.219369	0.567405
orf19.73	C6_04180W_A	C6_04180W_A	0.580322	0.0789831	0.275286	0.999481	0.0121936	0.982438
orf19.4231	C5_02240W_A	PTH2	0.580214	0.101586	0.122353	0.999481	0.310693	0.466266
orf19.547	CR_04560C_A	CR_04560C_A	0.579789	0.0532386	-0.0218262	0.999481	0.270055	0.434447
orf19.1539	C2_02220C_A	C2_02220C_A	0.579773	0.386043	0.080292	0.999481	0.48075	0.579675
orf19.1219	C6_04050W_A	C6_04050W_A	0.579559	0.215614	0.107486	0.999481	0.694292	0.246589
orf19.4191	C4_00510C_A	RLP24	0.579318	0.0868205	0.333241	0.999481	0.0776189	0.872416
orf19.5599	C6_03140C_A	MDL2	0.578294	0.0318836	0.279328	0.999481	0.40204	0.202098
orf19.4892	C1_10220C_A	TPK1	0.577409	0.192948	-0.285661	0.999481	0.386149	0.498075
snR63	C2_05420C_A	C2_05420C_A	0.576778	0.266812	0.151646	0.999481	0.631166	0.336316
orf19.5791	C2_03080W_A	IDH2	0.576501	0.127172	0.343584	0.999481	-0.0492803	0.936696
orf19.2182	C2_08010W_A	BLM3	0.575662	0.119982	0.0799094	0.999481	0.0623587	0.912487
orf19.969	C5_00260W_A	C5_00260W_A	0.575023	0.0424443	0.128329	0.999481	0.264593	0.399019
orf19.3138	C4_06720W_A	NOP1	0.573924	0.0586224	0.0456587	0.999481	0.239196	0.498326
orf19.5188	C7_02770W_A	CHS1	0.573229	0.12427	0.0242077	0.999481	0.525865	0.267539
orf19.5934	C3_04740C_A	C3_04740C_A	0.571296	0.136867	0.0259692	0.999481	-0.175722	0.74202
orf19.6649	CR_05650W_A	BRF1	0.571129	0.181367	-0.401912	0.999481	0.509897	0.356512
orf19.2204.2	C2_07750W_A	RHO2	0.57073	0.128934	0.118602	0.999481	0.262944	0.570372
orf19.4225	C5_02180C_A	LEU3	0.570175	0.0231759	0.00531159	0.999481	0.0734301	0.794667
orf19.1669	C3_01760W_A	AFG3	0.568826	0.0700386	0.245869	0.999481	0.19399	0.610841
orf19.7335	CR_09380W_A	PRE8	0.568322	0.15295	0.0775542	0.999481	-0.0267384	0.968647
orf19.5071	C1_08000W_A	NRP1	0.568174	0.153713	0.0330782	0.999481	0.286807	0.567405
orf19.6989	C3_05540C_A	C3_05540C_A	0.567941	0.10162	0.115731	0.999481	0.49081	0.251737
orf19.4526	C1_01990W_A	HSP30	0.567767	0.769358	0.105466	0.999481	0.203102	0.946376
orf19.6563	C7_01620C_A	KCH1	0.567591	0.339177	0.244897	0.999481	0.394419	0.601462
NA	NA	C4_04550C_A	0.566549	0.267084	0.129605	0.999481	-0.196401	0.789544
orf19.7594	CR_10180W_A	CR_10180W_A	0.566223	0.384144	0.0371042	0.999481	0.644174	0.430998
orf19.4150	C5_01560C_A	C5_01560C_A	0.565658	0.056748	0.0173157	0.999481	0.567376	0.152533
orf19.679	C1_11230W_A	FGR39	0.56541	0.0641065	0.263718	0.999481	0.572171	0.147727
orf19.3572	C2_05400W_A	C2_05400W_A	0.565151	0.137762	0.114002	0.999481	0.113565	0.832845
snR189c	C5_01150C_A	C5_01150C_A	0.564927	0.446032	-0.0964729	0.999481	0.8254	0.384391
orf19.491	CR_04080C_A	CR_04080C_A	0.564107	0.0294158	0.32271	0.999481	0.0356236	0.916644
orf19.5009	C1_13720W_A	C1_13720W_A	0.564078	0.0491143	-0.141914	0.999481	0.492667	0.185334
orf19.3694	C1_02370C_A	C1_02370C_A	0.563815	0.138508	0.0206683	0.999481	0.29589	0.533125
orf19.4841	C1_09760C_A	SHY1	0.563794	0.183861	0.53274	0.999481	-0.208615	0.713537
orf19.5031	C1_13930W_A	SSK1	0.563277	0.239325	-0.129456	0.999481	0.10908	0.883656
orf19.446	C1_05200C_A	C1_05200C_A	0.562978	0.0851664	0.308388	0.999481	0.125758	0.766562
orf19.607	CR_07910C_A	CR_07910C_A	0.562967	0.0493899	0.142044	0.999481	0.144928	0.671566
orf19.4537	C1_01860W_A	C1_01860W_A	0.562811	0.0321353	-0.0267435	0.999481	0.268735	0.350162
orf19.5165	C7_02960C_A	C7_02960C_A	0.562315	0.0970176	0.0309653	0.999481	0.177445	0.683727
orf19.5835	C2_02710C_A	C2_02710C_A	0.562105	0.0704156	-0.0210669	0.999481	0.447166	0.246294
orf19.30	C2_06540C_A	SPF1	0.561964	0.0507545	0.159187	0.999481	0.164874	0.627762
orf19.1481	C2_01700C_A	HAP42	0.561818	0.0628126	0.509891	0.999481	0.174119	0.61632
orf19.3507	C6_02040W_A	MCR1	0.561783	0.12448	0.197067	0.999481	-0.350816	0.439005
orf19.4110	C2_06090W_A	C2_06090W_A	0.560818	0.237275	0.176011	0.999481	0.26505	0.670467
orf19.5797	C2_03040W_A	PLC2	0.559981	0.0760722	0.453684	0.999481	0.231805	0.526185
orf19.2081	C2_00470W_A	POM152	0.559533	0.186846	-0.0183823	0.999481	0.43333	0.41846
orf19.4450.2	C1_07150W_A	C1_07150W_A	0.558326	0.152339	-0.0139546	0.999481	0.243824	0.631006
orf19.2181	C2_08030W_A	C2_08030W_A	0.55831	0.304137	-0.00878041	0.999481	-0.316808	0.687077
orf19.783	C1_04630C_A	C1_04630C_A	0.558229	0.0513189	0.16126	0.999481	-0.033513	0.939152
orf19.2444	C1_06010W_A	CHS7	0.556872	0.0837046	0.0783289	0.999481	0.482033	0.22865
orf19.6343	C1_12790C_A	FEN1	0.556392	0.0647531	0.192827	0.999481	0.374409	0.295515
orf19.6063	C1_00440W_A	UBP6	0.555961	0.192286	0.0796531	0.999481	-0.0584229	0.934597
orf19.6420	CR_08510W_A	PGA13	0.555614	0.209667	0.638233	0.999481	-2.19456	0.011676
orf19.5257	C1_12080W_A	LCB4	0.55538	0.233247	0.0389907	0.999481	0.234939	0.719396
orf19.477	CR_03950W_A	CR_03950W_A	0.554697	0.09956	-0.052163	0.999481	0.75604	0.119323
orf19.5489	C2_06270W_A	C2_06270W_A	0.55425	0.433508	0.253725	0.999481	-0.209942	0.841841
orf19.4941	C1_13140C_A	TYE7	0.554012	0.14579	0.181156	0.999481	-0.427421	0.373656
orf19.3147	C2_06750C_A	C2_06750C_A	0.553714	0.111657	-0.079105	0.999481	0.343449	0.427055
orf19.5168	C7_02930C_A	C7_02930C_A	0.553017	0.0482412	-0.0202384	0.999481	0.17842	0.581571
orf19.3333	C1_01470W_A	C1_01470W_A	0.552577	0.0440125	0.0351704	0.999481	0.137896	0.67053
orf19.3407	C6_01770W_A	RAD18	0.552452	0.197526	-0.00725915	0.999481	0.593345	0.277422
orf19.5986	C3_05130C_A	THI4	0.552427	0.349039	-0.0212633	0.999481	0.140391	0.879423
orf19.6316.4	CR_04750W_A	CR_04750W_A	0.552135	0.159209	0.00645333	0.999481	0.399216	0.410486
orf19.7388	C3_06070C_A	PBS2	0.551936	0.133912	-0.0613979	0.999481	0.416797	0.367982
orf19.962	C5_00310C_A	C5_00310C_A	0.551719	0.11311	0.110144	0.999481	0.354118	0.405178
orf19.3141	C4_06680C_A	C4_06680C_A	0.550776	0.0440636	0.02857	0.999481	0.388193	0.229931
orf19.267	C3_02760C_A	C3_02760C_A	0.55064	0.0303411	0.0916349	0.999481	0.161462	0.551581
orf19.610	CR_07890W_A	EFG1	0.550408	0.0513189	-0.0947847	0.999481	0.798621	0.0565221
orf19.978	C5_00200C_A	BDF1	0.549724	0.0396073	0.0562728	0.999481	0.668049	0.0747301
orf19.5027	C1_13900C_A	LCB2	0.549346	0.029826	0.118385	0.999481	0.202941	0.449955
orf19.6968	C3_05320W_A	C3_05320W_A	0.548497	0.43551	0.656952	0.999481	0.633179	0.465251
orf19.3129	C4_06800W_A	C4_06800W_A	0.548328	0.0706927	-0.0978561	0.999481	0.375058	0.307227
orf19.276	C3_02850C_A	C3_02850C_A	0.547338	0.227603	-0.104256	0.999481	0.683912	0.254339
orf19.4750	C1_08910C_A	C1_08910C_A	0.546803	0.0849726	0.202791	0.999481	0.500792	0.203563
orf19.1439	C4_03330W_A	IPK1	0.546584	0.0518006	0.261828	0.999481	0.199798	0.526503
orf19.681	C1_11210C_A	HAP43	0.545622	0.0638239	-0.118602	0.999481	2.29956	0.000105658
orf19.1305	C4_03730C_A	C4_03730C_A	0.545574	0.0765866	0.045108	0.999481	0.605187	0.152533
orf19.2633.1	CR_07740W_A	CR_07740W_A	0.544935	0.762552	-0.351728	0.999481	-0.328119	0.914731
orf19.4257	C5_02470W_A	INT1	0.544415	0.325091	0.0997083	0.999481	0.609182	0.395442
orf19.5365	C2_10820C_A	C2_10820C_A	0.544409	0.0750615	-0.160065	0.999481	0.217578	0.5539
orf19.4266	C5_02540C_A	SPR28	0.544358	0.218341	0.109967	0.999481	0.465565	0.397247
orf19.7590	CR_10140W_A	CR_10140W_A	0.543871	0.124669	0.197821	0.999481	-0.241138	0.592098
orf19.1233	C1_07710C_A	ADE4	0.543239	0.104824	-0.169897	0.999481	0.346172	0.398272
orf19.1957	C5_01130W_A	CYC3	0.542948	0.231607	0.425119	0.999481	0.248526	0.679689
orf19.4301	C5_02780W_A	C5_02780W_A	0.5429	0.315633	-0.152768	0.999481	0.246251	0.751741
orf19.6860	C4_05210W_A	C4_05210W_A	0.54179	0.0825191	0.190886	0.999481	0.123242	0.762454
orf19.3219	C5_03930C_A	C5_03930C_A	0.54121	0.209658	0.359701	0.999481	0.153685	0.791905
orf19.6208	C1_07000W_A	MEF2	0.541126	0.0404178	0.273954	0.999481	0.610246	0.0843546
orf19.6027	C1_00790W_A	C1_00790W_A	0.53981	0.157653	0.0178106	0.999481	0.0916732	0.872832
orf19.5203	C1_04350C_A	C1_04350C_A	0.539583	0.241868	0.319635	0.999481	0.934348	0.142007
orf19.4995	C1_13590W_A	C1_13590W_A	0.539003	0.323144	-0.236637	0.999481	0.604903	0.397247
orf19.1251	C4_05660C_A	BRN1	0.538195	0.081021	0.0260702	0.999481	0.337171	0.363957
orf19.2487	C1_05650W_A	C1_05650W_A	0.53787	0.0706355	0.136747	0.999481	-0.0147178	0.97569
orf19.1299	C4_03790W_A	RPN6	0.537533	0.213287	0.0281063	0.999481	0.0396307	0.958172
orf19.5557	C6_02830W_A	MNN4-4	0.537285	0.659019	0.376162	0.999481	-1.08402	0.495491
orf19.6143	CR_07250C_A	CR_07250C_A	0.536946	0.320509	0.223912	0.999481	-0.971713	0.222828
orf19.3439	C6_01450C_A	C6_01450C_A	0.53641	0.184682	0.391084	0.999481	-0.8412	0.169356
orf19.6751	C3_07400W_A	C3_07400W_A	0.536161	0.101586	-0.083448	0.999481	0.251454	0.531418
orf19.417	C1_05470W_A	MTM1	0.536136	0.076905	0.238374	0.999481	1.08881	0.0164375
orf19.6526	C7_01950W_A	C7_01950W_A	0.535379	0.163434	0.271122	0.999481	0.382297	0.410427
orf19.5654	C4_00280W_A	STE24	0.535346	0.0501336	0.188667	0.999481	0.0738472	0.834617
orf19.4128	C2_04830W_A	C2_04830W_A	0.535158	0.0927667	0.039448	0.999481	0.288467	0.450738
orf19.5439	C3_00300W_A	C3_00300W_A	0.534442	0.144638	-0.168827	0.999481	0.411881	0.376539
orf19.4279	C5_02630C_A	MNN1	0.534256	0.376764	-1.39815	0.999481	-1.154	0.28981
orf19.2639	C5_03410C_A	C5_03410C_A	0.534182	0.118062	0.119964	0.999481	0.798642	0.111882
orf19.7033	C7_00840C_A	C7_00840C_A	0.53363	0.158153	0.581667	0.999481	-0.101588	0.841841
orf19.5291	C4_04180C_A	C4_04180C_A	0.532828	0.27827	0.419036	0.999481	0.103386	0.88759
orf19.1105.3	C5_03890C_A	C5_03890C_A	0.530412	0.578727	-0.0166595	0.999481	-0.0778613	0.963971
orf19.5134	C7_03210W_A	C7_03210W_A	0.529844	0.0873445	0.233815	0.999481	-0.101289	0.803685
orf19.2949	C1_02610W_A	IML1	0.529331	0.168674	-0.296897	0.999481	0.691221	0.198118
orf19.4001	C5_05090W_A	C5_05090W_A	0.528986	0.102439	0.125829	0.999481	0.169358	0.68118
orf19.1944	C5_01250W_A	GPR1	0.527694	0.345891	0.587073	0.999481	0.334573	0.649299
orf19.5646	C4_00210W_A	C4_00210W_A	0.52769	0.181918	-0.0411517	0.999481	0.608626	0.235845
orf19.1007	CR_05260C_A	KCS1	0.52761	0.143519	0.0674248	0.999481	0.114378	0.820404
orf19.7452	C3_06630W_A	C3_06630W_A	0.52757	0.106723	-0.0241709	0.999481	0.0736326	0.879762
orf19.4813	C1_09490C_A	GUA1	0.526884	0.0761121	0.131089	0.999481	0.451545	0.22865
orf19.3230	CR_01240C_A	BOI2	0.52616	0.19036	-0.110331	0.999481	0.490662	0.344278
orf19.5142	C7_03130C_A	DFR1	0.525969	0.1314	-0.0272381	0.999481	0.199981	0.6628
orf19.4162	C4_00790C_A	MLH1	0.525612	0.187965	-0.127285	0.999481	0.090541	0.884607
orf19.5358	C2_10760C_A	C2_10760C_A	0.525076	0.0905652	-0.05359	0.999481	0.196426	0.609994
orf19.5976	C3_05060W_A	C3_05060W_A	0.52432	0.126675	0.120445	0.999481	0.138771	0.766562
orf19.7586	CR_10110W_A	CHT3	0.52424	0.131816	-0.128226	0.999481	1.02636	0.0614991
orf19.3586	C2_08830W_A	C2_08830W_A	0.523371	0.391672	0.370914	0.999481	0.310608	0.704605
orf19.5605	C6_03180C_A	C6_03180C_A	0.523234	0.216988	-0.142997	0.999481	0.308043	0.579391
orf19.2929	C1_02420C_A	GSC1	0.523152	0.0222506	-0.000580613	0.99972	0.391121	0.151994
orf19.4743	C1_08850C_A	AFG1	0.523075	0.203941	0.510903	0.999481	1.27125	0.0309447
orf19.323	C3_03250W_A	C3_03250W_A	0.522451	0.0760176	0.232108	0.999481	0.348211	0.323141
orf19.1586	C2_02600C_A	FGR22	0.522387	0.491574	-0.0792342	0.999481	-0.407964	0.716563
orf19.7438	C3_06500W_A	UBA1	0.521811	0.159971	0.0162686	0.999481	0.0114228	0.986589
orf19.4855	C1_09880C_A	BUD31	0.52014	0.19651	-0.0130114	0.999481	0.453307	0.373194
orf19.18	C2_06390C_A	IMH3	0.518379	0.0468179	-0.0662436	0.999481	0.621164	0.0926419
orf19.318	C3_03190C_A	C3_03190C_A	0.518102	0.246607	0.497104	0.999481	-0.0396118	0.957896
orf19.443	C1_05230W_A	C1_05230W_A	0.517858	0.091233	0.0900835	0.999481	0.500851	0.202427
orf19.970	C5_00250C_A	C5_00250C_A	0.5178	0.0934934	-0.183381	0.999481	0.413875	0.289529
orf19.3116	C4_06930C_A	EXM2	0.517544	0.182311	-0.161422	0.999481	0.23368	0.650633
orf19.2765	C4_02390W_A	PGA62	0.517514	0.186628	0.151892	0.999481	-0.186896	0.729534
orf19.5561	C6_02860W_A	STE23	0.517218	0.323144	0.423907	0.999481	-0.322056	0.648499
snR58	C6_02390W_A	C6_02390W_A	0.51704	0.20577	0.067815	0.999481	0.279146	0.598474
orf19.2500	C3_00960W_A	C3_00960W_A	0.516881	0.0628126	0.127766	0.999481	0.201407	0.529041
orf19.4929	C1_13010W_A	C1_13010W_A	0.51672	0.0995031	0.243004	0.999481	0.221917	0.557265
orf19.4398	CR_03540W_A	CR_03540W_A	0.516411	0.0686575	0.119159	0.999481	0.531867	0.15618
orf19.4495	C2_04550C_A	NDH51	0.515793	0.171226	0.313759	0.999481	-0.572437	0.250779
orf19.952	C5_00380W_A	C5_00380W_A	0.5153	0.101465	0.261917	0.999481	0.164945	0.669927
orf19.258	C3_02660W_A	C3_02660W_A	0.514932	0.449039	1.12234	0.999481	-0.146105	0.877186
orf19.5530	C6_02600W_A	NAB3	0.514635	0.0538975	0.00473265	0.999481	0.419765	0.207928
orf19.6758	C3_07330W_A	C3_07330W_A	0.514154	0.551844	-0.16359	0.999481	-0.587161	0.635985
orf19.2360	CR_07050C_A	URA2	0.513773	0.098556	0.234382	0.999481	0.276677	0.467591
orf19.6573	C7_01550W_A	BEM2	0.513094	0.0379557	0.287792	0.999481	0.253879	0.354174
orf19.5597	C6_03120W_A	POL5	0.512399	0.0647531	0.0310087	0.999481	0.439495	0.211577
orf19.5483	C2_06200C_A	C2_06200C_A	0.511658	0.0556839	0.267089	0.999481	0.360045	0.251737
orf19.2042	C2_00820W_A	C2_00820W_A	0.510247	0.0369238	0.106393	0.999481	0.263551	0.323048
orf19.4252	C5_02440C_A	C5_02440C_A	0.509645	0.130312	-0.0613453	0.999481	0.273887	0.515689
orf19.2980	C1_02900C_A	C1_02900C_A	0.508833	0.154377	0.0294252	0.999481	0.398857	0.37237
orf19.2307	C1_11090C_A	C1_11090C_A	0.508818	0.0749335	0.0927971	0.999481	0.149705	0.674891
orf19.1302	C4_03760W_A	C4_03760W_A	0.508469	0.522154	0.421704	0.999481	-0.439161	0.680961
orf19.799	C2_04210W_A	STE4	0.507582	0.534362	0.306651	0.999481	-0.867316	0.426198
orf19.5162	C7_02990W_A	BCK1	0.507092	0.0363122	-0.103431	0.999481	0.210003	0.430177
orf19.6858	C4_05190C_A	EDC3	0.506852	0.157357	-0.109702	0.999481	0.403083	0.374878
orf19.7593	CR_10170C_A	CR_10170C_A	0.506609	0.304197	-0.0271597	0.999481	0.491595	0.440095
orf19.3537	C2_05060C_A	C2_05060C_A	0.506469	0.575571	0.125565	0.999481	2.31147	0.0638516
orf19.6285	CR_07650W_A	GLC7	0.506021	0.0441851	0.0587808	0.999481	0.136898	0.637828
orf19.1959	C5_01110W_A	C5_01110W_A	0.505407	0.139989	0.023623	0.999481	0.318851	0.45332
orf19.6314	CR_04780W_A	RPB8	0.504817	0.0686309	0.128832	0.999481	0.277418	0.392842
orf19.5621	C6_03330C_A	C6_03330C_A	0.503665	0.148201	0.0796968	0.999481	0.311529	0.468338
orf19.4216	C5_02110W_A	C5_02110W_A	0.503331	0.488503	-0.324687	0.999481	0.58963	0.538447
orf19.5144	C7_03110W_A	PGA28	0.502889	0.386094	0.102694	0.999481	0.288859	0.721846
orf19.6229	C1_06810W_A	CAT1	0.502309	0.395916	0.433925	0.999481	-0.407724	0.606352
orf19.556	CR_05200C_A	CR_05200C_A	0.502134	0.0829845	0.209363	0.999481	0.0313708	0.945319
orf19.5833	C2_02730W_A	C2_02730W_A	0.501544	0.29365	0.0603803	0.999481	-0.190087	0.78301
orf19.5239	C1_12240C_A	C1_12240C_A	0.500892	0.220629	0.0782203	0.999481	-0.32965	0.534399
orf19.1351	C2_08320C_A	C2_08320C_A	0.500761	0.402266	-0.0592682	0.999481	0.695347	0.36478
orf19.1403	C2_09510C_A	C2_09510C_A	0.500636	0.0788128	-0.12639	0.999481	0.0631727	0.878131
orf19.2000	C2_01240C_A	C2_01240C_A	0.500548	0.0780025	-0.0339199	0.999481	0.130941	0.726358
orf19.871	C2_03500W_A	C2_03500W_A	0.500413	0.20468	0.2169	0.999481	-0.0192734	0.977308
orf19.474	CR_03930C_A	CR_03930C_A	0.50026	0.0635192	0.246061	0.999481	0.224633	0.466266
orf19.3552	C2_05220C_A	C2_05220C_A	0.499851	0.0284825	0.00291644	0.999481	0.333436	0.202427
orf19.7286	CR_08910C_A	RPN7	0.499306	0.269663	0.00752132	0.999481	-0.1604	0.804355
orf19.6781	C3_07200C_A	ZFU2	0.498806	0.285291	0.484749	0.999481	-0.186779	0.775878
orf19.3428	C6_01590W_A	C6_01590W_A	0.498395	0.109543	-0.042628	0.999481	0.403164	0.301548
orf19.3540	C2_05090W_A	MAK5	0.497931	0.104685	0.0602635	0.999481	0.351971	0.354944
orf19.1871	C2_07560W_A	SWR1	0.497564	0.0584389	-0.114888	0.999481	0.442358	0.194551
orf19.3174	C5_01970C_A	CDC24	0.497386	0.0201859	0.268417	0.999481	-0.0761548	0.74042
orf19.2818	CR_02590C_A	CR_02590C_A	0.497169	0.113276	0.000187217	0.99972	-0.0253063	0.962938
orf19.930	C5_00590W_A	PET9	0.496873	0.245059	0.436139	0.999481	-0.292168	0.607432
orf19.7631	CR_10520C_A	SLD5	0.4967	0.112284	-0.074384	0.999481	-0.0840689	0.857813
orf19.1901	C2_07350W_A	MCM3	0.496622	0.0556804	-0.0949164	0.999481	0.51458	0.144781
orf19.968	C5_00270W_A	PGA14	0.496474	0.041965	0.0532992	0.999481	0.298418	0.28152
orf19.1260	C4_05750C_A	LEA1	0.49643	0.176837	-0.304841	0.999481	0.40684	0.390924
orf19.6610	CR_09520C_A	CR_09520C_A	0.496337	0.0794575	-0.0838544	0.999481	0.348916	0.312239
orf19.3376	C4_03490C_A	C4_03490C_A	0.495759	0.427098	0.196915	0.999481	0.199173	0.823061
orf19.822	C2_04010C_A	HSP21	0.495677	0.755376	-0.846164	0.999481	0.133813	0.962643
orf19.1069	C1_04330W_A	RPN4	0.494997	0.266305	0.322218	0.999481	0.273747	0.639447
orf19.787	C4_03950C_A	C4_03950C_A	0.494544	0.523863	0.437165	0.999481	-0.684446	0.494909
orf19.101	C6_00990W_A	RIM9	0.494425	0.593031	-0.0211012	0.999481	-0.900539	0.485699
orf19.1261	C4_05760W_A	CGT1	0.494105	0.0889978	-0.033361	0.999481	0.320248	0.364929
orf19.5758	C6_03830W_A	SAL6	0.493587	0.181584	0.137347	0.999481	0.341466	0.461756
orf19.2601	CR_02000C_A	HEM1	0.493332	0.0646475	0.234235	0.999481	0.359591	0.266422
orf19.2253	C2_06990W_A	C2_06990W_A	0.49313	0.498951	0.972285	0.999481	-0.549739	0.531418
orf19.3216	C5_03950W_A	C5_03950W_A	0.493106	0.270302	0.2185	0.999481	0.243011	0.68775
orf19.5574	C6_02960W_A	C6_02960W_A	0.492581	0.141612	0.0608805	0.999481	0.452176	0.278172
orf19.7166	C7_04090C_A	C7_04090C_A	0.492412	0.369149	-0.21483	0.999481	0.263779	0.737003
orf19.3991	C5_05000C_A	C5_05000C_A	0.491086	0.0700756	-0.0962067	0.999481	0.377064	0.256407
orf19.4506	C2_04460W_A	LYS22	0.491015	0.331275	-0.293298	0.999481	0.0085364	0.990928
orf19.2673	C4_03170W_A	C4_03170W_A	0.489347	0.10471	-0.0768552	0.999481	0.386902	0.302319
orf19.7107	C7_00160C_A	C7_00160C_A	0.48893	0.168398	0.0785912	0.999481	0.120007	0.808682
orf19.2478	C1_05740C_A	C1_05740C_A	0.488202	0.456272	-0.222088	0.999481	0.587936	0.492767
orf19.3124	C4_06850C_A	C4_06850C_A	0.486442	0.0564581	-0.0789582	0.999481	0.185655	0.531418
orf19.6654	C5_03470C_A	C5_03470C_A	0.486399	0.0732854	0.239888	0.999481	0.0413201	0.916583
orf19.3506	C6_02050W_A	DBR1	0.486163	0.103462	-0.056362	0.999481	0.321827	0.380211
orf19.2720	C4_02780W_A	C4_02780W_A	0.486076	0.0428792	0.0356135	0.999481	0.0535987	0.864834
orf19.690	C6_02000W_A	PLB2	0.485384	0.588707	-0.0290675	0.999481	0.237509	0.860157
orf19.3536	C2_05050C_A	C2_05050C_A	0.485129	0.0504234	0.0322466	0.999481	0.259771	0.361071
orf19.3561	C2_05320W_A	CDC7	0.484956	0.0539388	0.0479641	0.999481	0.11755	0.707019
orf19.677	C1_11240C_A	CHO1	0.484761	0.0818854	0.38723	0.999481	0.0623843	0.873342
orf19.329	C3_03300C_A	C3_03300C_A	0.484714	0.0732854	0.0274516	0.999481	0.141433	0.677606
orf19.3977	C5_04900C_A	C5_04900C_A	0.484015	0.110768	-0.109639	0.999481	0.373442	0.327706
orf19.7393	C3_06110C_A	C3_06110C_A	0.483211	0.0443767	-0.0142045	0.999481	0.351829	0.220895
orf19.2982	C1_02910C_A	C1_02910C_A	0.482977	0.353517	0.184485	0.999481	-0.259192	0.728091
orf19.4175	C4_00670W_A	TOK1	0.482439	0.0456443	0.0521441	0.999481	0.38571	0.194954
orf19.3222	CR_01320C_A	CR_01320C_A	0.482291	0.181584	0.141893	0.999481	-0.163172	0.742614
orf19.1298	C4_03800C_A	NUP84	0.482224	0.130312	-0.0494523	0.999481	0.558788	0.198286
orf19.588	C5_00850C_A	C5_00850C_A	0.482132	0.213205	0.168174	0.999481	-0.0212932	0.974173
orf19.1575	C2_02510W_A	PRS1	0.481924	0.0867338	0.0498131	0.999481	0.391522	0.259945
orf19.1447	C2_01420C_A	C2_01420C_A	0.481607	0.253222	-0.163125	0.999481	0.249791	0.667931
snR69	C5_01160C_A	C5_01160C_A	0.481602	0.266117	0.450938	0.999481	0.386943	0.45633
orf19.3254	CR_01020C_A	CR_01020C_A	0.481535	0.0706006	0.158494	0.999481	0.266523	0.384541
orf19.1994	C2_01310W_A	C2_01310W_A	0.481264	0.0333702	0.225742	0.999481	0.0903369	0.729534
orf19.7604	CR_10290C_A	CR_10290C_A	0.481185	0.0469851	-0.129692	0.999481	0.348347	0.228725
orf19.1890	C2_07410W_A	C2_07410W_A	0.480694	0.0796751	0.0887652	0.999481	-0.124662	0.729006
orf19.6068	C1_00400W_A	SVF1	0.479071	0.0488405	0.136083	0.999481	0.0908755	0.766763
orf19.2281	C2_07240C_A	C2_07240C_A	0.478524	0.351423	-0.0333454	0.999481	0.0540127	0.95306
orf19.6734	C3_07560W_A	TCC1	0.478253	0.0922696	0.289517	0.999481	0.171269	0.627847
orf19.3581	C2_05510C_A	C2_05510C_A	0.478125	0.111657	-0.0518797	0.999481	0.313993	0.392935
orf19.2379	CR_03420C_A	NOT4	0.477844	0.136426	0.0584914	0.999481	-0.0624031	0.897185
orf19.4525	C1_02000W_A	C1_02000W_A	0.477499	0.162361	0.238656	0.999481	-0.149233	0.751365
orf19.3256	CR_01000C_A	SLN1	0.477181	0.0763587	-0.116551	0.999481	0.519986	0.163179
orf19.1815	CR_07080W_A	CR_07080W_A	0.476632	0.0838735	-0.0979	0.999481	0.220889	0.509196
orf19.1827	C1_06220C_A	C1_06220C_A	0.476451	0.526036	0.521388	0.999481	-0.87341	0.375868
orf19.4774	C1_09160W_A	AOX1	0.4763	0.466317	0.97904	0.999481	-0.471449	0.551581
NA	NA	ENSRNA049499068	0.476292	0.450591	0.194698	0.999481	0.825335	0.282609
orf19.5550	C6_02770W_A	MRT4	0.475069	0.117851	0.164989	0.999481	0.310706	0.405496
orf19.3833	C4_04510W_A	C4_04510W_A	0.474656	0.113653	0.064729	0.999481	0.496676	0.21213
orf19.1823	C1_06270W_A	C1_06270W_A	0.4737	0.0538975	0.264591	0.999481	-0.0274819	0.940192
orf19.4843	C1_09780C_A	C1_09780C_A	0.473567	0.218726	0.0905402	0.999481	0.921481	0.113844
orf19.600	CR_07960C_A	TRK1	0.47329	0.0543435	0.0723181	0.999481	-0.0264239	0.944291
orf19.4349	C5_03170C_A	C5_03170C_A	0.473009	0.112443	0.142091	0.999481	0.245546	0.500569
orf19.4367	CR_03680C_A	SMC1	0.472897	0.0941577	0.0131115	0.999481	0.353677	0.309936
orf19.5586	C6_03040C_A	C6_03040C_A	0.472763	0.0905652	0.118175	0.999481	0.186246	0.580052
orf19.3553	C2_05230C_A	RPF2	0.472257	0.126194	0.140869	0.999481	0.332411	0.384391
orf19.5001	C1_13640W_A	CUP2	0.472171	0.0581069	-0.0928846	0.999481	0.142558	0.633548
orf19.4347	C5_03150W_A	C5_03150W_A	0.471999	0.257549	0.222889	0.999481	0.162288	0.784078
orf19.4707	C4_00850C_A	C4_00850C_A	0.471835	0.513908	-0.642299	0.999481	0.33104	0.76468
orf19.2417	CR_03100W_A	SMC5	0.470714	0.0306316	0.0331931	0.999481	0.323648	0.202427
orf19.1767	C2_10140W_A	C2_10140W_A	0.470507	0.127134	0.240926	0.999481	-0.27406	0.471788
orf19.5256	C1_12090C_A	C1_12090C_A	0.469342	0.645254	0.0292589	0.999481	-0.0620185	0.972142
orf19.4004	C5_05120W_A	CCT3	0.468963	0.0504234	-0.0642611	0.999481	0.123392	0.669542
orf19.5469	C3_00030C_A	C3_00030C_A	0.468748	0.276226	0.422855	0.999481	0.299488	0.599487
orf19.891	C2_03360W_A	C2_03360W_A	0.468609	0.0861367	0.149922	0.999481	0.278974	0.393872
orf19.2012	C2_01130W_A	NOT3	0.468574	0.0628262	-0.159712	0.999481	0.292154	0.332878
orf19.7349	C3_05700W_A	CHS4	0.4683	0.0818854	-0.0704421	0.999481	0.445079	0.204168
orf19.2301	C1_11150W_A	C1_11150W_A	0.467866	0.399814	0.0589016	0.999481	-0.165074	0.843079
orf19.966	C5_00290W_A	DUS4	0.467663	0.168773	-0.11714	0.999481	0.244119	0.579578
orf19.4062	C1_05090W_A	TRY2	0.467545	0.115547	-0.086729	0.999481	0.260038	0.478731
orf19.1667	C3_01790C_A	C3_01790C_A	0.467343	0.116397	-0.127372	0.999481	0.0920125	0.827771
orf19.3841	C4_04450C_A	ATG1	0.46709	0.374484	0.121409	0.999481	-0.184191	0.808952
orf19.3867	CR_06120W_A	RPL7	0.466916	0.190019	0.101245	0.999481	0.317404	0.481873
orf19.3378	C4_03500C_A	C4_03500C_A	0.466628	0.709587	-0.440168	0.999481	-0.540017	0.775581
orf19.4948	C1_13200C_A	REX3	0.466356	0.134985	-0.0555222	0.999481	0.173006	0.674966
orf19.6730	C3_07600W_A	C3_07600W_A	0.465861	0.104123	-0.00771113	0.999481	0.197103	0.580884
orf19.4593.1	C4_01990W_A	C4_01990W_A	0.465165	0.188581	0.319028	0.999481	0.0927277	0.852603
orf19.5130	C7_03250C_A	PDI1	0.463185	0.0927667	0.153367	0.999481	-0.119747	0.74202
orf19.2087	C2_00440W_A	SAS2	0.463099	0.121198	-0.0512757	0.999481	0.184303	0.629627
orf19.2544	CR_01570W_A	CR_01570W_A	0.463094	0.211323	-0.104607	0.999481	0.564243	0.250191
orf19.3432	C6_01520W_A	C6_01520W_A	0.46298	0.66445	0.341182	0.999481	0.000686998	0.99937
orf19.6400	CR_08330W_A	CR_08330W_A	0.461047	0.208145	-0.435316	0.999481	0.48635	0.327772
orf19.7615	CR_10390W_A	CR_10390W_A	0.460985	0.130723	-0.0283266	0.999481	0.430499	0.26027
orf19.6295	C5_01640W_A	MAS2	0.45996	0.0531007	0.127555	0.999481	0.557593	0.0969983
orf19.1488	C2_01760C_A	C2_01760C_A	0.459696	0.210406	0.241569	0.999481	0.167105	0.73434
orf19.4082	C2_09220W_A	DDR48	0.459462	0.486836	0.69852	0.999481	-0.800332	0.352002
orf19.3106	C4_07030W_A	MET16	0.459242	0.455682	-0.603563	0.999481	0.859528	0.299612
orf19.1445	C2_01400C_A	ESC4	0.458369	0.210096	0.024732	0.999481	0.322327	0.485167
orf19.812	C2_04090W_A	C2_04090W_A	0.458196	0.628415	-0.305731	0.999481	-0.0626244	0.970093
orf19.6369	CR_08100C_A	RIO2	0.458121	0.0910957	-0.0288147	0.999481	0.368741	0.273167
orf19.1313	C4_03620C_A	CDR3	0.457607	0.384144	0.316507	0.999481	0.0919652	0.907376
orf19.2612	CR_02120C_A	CR_02120C_A	0.457558	0.192089	0.244658	0.999481	0.235148	0.590099
orf19.5311	C4_04010W_A	C4_04010W_A	0.457459	0.0705081	0.412588	0.999481	-0.0963606	0.763963
orf19.1606	C3_02390W_A	C3_02390W_A	0.457352	0.214074	0.247816	0.999481	-0.173218	0.733538
tL(CAA)4	CR_08530C_A	tL(CAA)4	0.457277	0.571512	0.183031	0.999481	-0.0594079	0.967874
orf19.7207	C1_14000C_A	DOA4	0.456879	0.46892	0.0263808	0.999481	-0.24172	0.790949
orf19.1685	C3_01580W_A	ZCF7	0.456771	0.228868	0.338497	0.999481	0.00925722	0.98937
orf19.5255	C1_12100C_A	PXA2	0.45648	0.44238	1.1179	0.999481	-1.25011	0.153599
orf19.2191	C2_07920W_A	C2_07920W_A	0.455968	0.1314	-0.101128	0.999481	0.306578	0.413929
orf19.2008	C2_01160W_A	C2_01160W_A	0.455663	0.0838735	0.146478	0.999481	0.0640844	0.862572
orf19.522	CR_04340W_A	PIM1	0.455581	0.368379	0.157509	0.999481	0.206	0.77926
orf19.3608	C2_08680W_A	MSH3	0.455546	0.163215	0.19729	0.999481	0.239756	0.551581
orf19.3293	C1_01050C_A	C1_01050C_A	0.455351	0.0786088	0.0160608	0.999481	0.235918	0.447227
orf19.2977	C1_02880C_A	MIA40	0.454953	0.338887	0.447727	0.999481	0.211277	0.755677
orf19.184	C2_04800C_A	MDM10	0.453849	0.175214	-0.0818125	0.999481	0.277607	0.515681
orf19.916	CR_06560C_A	CR_06560C_A	0.453679	0.253428	0.214345	0.999481	-0.0681396	0.915302
orf19.22	C2_06440C_A	C2_06440C_A	0.453533	0.399735	0.815181	0.999481	0.750698	0.250779
orf19.6947	C3_03720W_A	GTT11	0.453116	0.501601	0.112109	0.999481	-0.0782627	0.945733
orf19.7451	C3_06620W_A	FUN31	0.452616	0.162259	-0.0912206	0.999481	0.17356	0.690221
orf19.6136	CR_07320C_A	CR_07320C_A	0.452571	0.230853	0.385632	0.999481	0.432514	0.374341
orf19.5627	C6_03380W_A	C6_03380W_A	0.451623	0.0994837	0.0256334	0.999481	0.240687	0.470837
snR66	CR_06630W_A	CR_06630W_A	0.451529	0.437911	0.101752	0.999481	0.803174	0.270196
orf19.2472	C1_05800C_A	C1_05800C_A	0.451493	0.234049	0.0220284	0.999481	0.0949252	0.871434
orf19.6804	C3_06970W_A	C3_06970W_A	0.451198	0.0691361	0.0226284	0.999481	0.335441	0.266211
orf19.7195	C7_03870W_A	RAD6	0.450642	0.131657	0.0735511	0.999481	0.138655	0.730837
orf19.1005	C1_10570C_A	C1_10570C_A	0.450503	0.533958	-0.0913615	0.999481	0.285684	0.78301
orf19.6287	CR_07620W_A	AAT21	0.450367	0.0440125	0.317406	0.999481	-0.142008	0.578881
orf19.7295	CR_08980C_A	CR_08980C_A	0.450215	0.11985	0.0316775	0.999481	0.0180566	0.970093
orf19.5614	C6_03260W_A	C6_03260W_A	0.449377	0.387632	0.139616	0.999481	-0.0440215	0.962395
orf19.7079	C7_00410C_A	C7_00410C_A	0.449168	0.302819	0.0330876	0.999481	0.622709	0.270196
orf19.232	C3_02440C_A	MED7	0.44894	0.146367	-0.0752801	0.999481	0.24788	0.526185
orf19.4805	C1_09430W_A	C1_09430W_A	0.448776	0.213369	0.217448	0.999481	0.381483	0.392842
orf19.4637	C4_01470W_A	C4_01470W_A	0.448199	0.110456	0.0117015	0.999481	0.19872	0.567725
orf19.1798	C4_05420C_A	TSC2	0.447133	0.14146	-0.0538485	0.999481	0.442257	0.255722
orf19.2075	C2_00520W_A	DFG5	0.446908	0.39216	-0.0196785	0.999481	-0.187756	0.80344
orf19.5169	C7_02920W_A	C7_02920W_A	0.446636	0.670259	0.72332	0.999481	-1.22659	0.3554
orf19.6222	C1_06880C_A	SPO22	0.446386	0.324518	-0.0737943	0.999481	-0.0702125	0.929327
orf19.7070	C7_00500W_A	C7_00500W_A	0.446167	0.467206	-0.929197	0.999481	1.15226	0.210137
orf19.5783	C2_03130W_A	C2_03130W_A	0.445264	0.127172	-0.154414	0.999481	0.371375	0.315846
orf19.7658	CR_10700W_A	RFC4	0.444918	0.322404	-0.175832	0.999481	0.390234	0.509291
orf19.1803	CR_04910W_A	CDC43	0.444889	0.156779	0.0960641	0.999481	0.116105	0.787963
orf19.2657	C5_03210C_A	C5_03210C_A	0.444678	0.343215	0.0100498	0.999481	0.0556607	0.945319
orf19.5736	C6_03690W_A	ALS5	0.444412	0.149563	0.0944942	0.999481	0.313301	0.406625
orf19.6926	C3_03890W_A	CSC25	0.444192	0.0620124	-0.0708859	0.999481	0.337267	0.246589
orf19.1578	C2_02540W_A	C2_02540W_A	0.443698	0.170027	0.189847	0.999481	0.449403	0.284811
orf19.3971	C5_04850W_A	C5_04850W_A	0.44364	0.342668	0.374243	0.999481	-0.230075	0.724318
orf19.2686	C4_03050C_A	C4_03050C_A	0.443517	0.068106	0.102585	0.999481	0.146372	0.61936
tG(CCC)1	C4_00550C_A	tG(CCC)1	0.443175	0.797882	0.344225	0.999481	0.331245	0.888993
orf19.527	CR_04370W_A	CR_04370W_A	0.443134	0.1097	0.104234	0.999481	0.267946	0.421249
orf19.2989	C1_02980W_A	GOR1	0.442856	0.591818	-0.0740592	0.999481	-0.201948	0.872416
orf19.1456	C2_01500W_A	C2_01500W_A	0.442598	0.678261	-0.0932324	0.999481	-0.05945	0.974003
orf19.5412	C3_00510W_A	C3_00510W_A	0.442513	0.13802	0.169511	0.999481	0.0388916	0.935786
orf19.5943	C3_04800C_A	C3_04800C_A	0.441981	0.456892	0.142432	0.999481	-0.513489	0.519395
orf19.6315	CR_04770C_A	CR_04770C_A	0.441951	0.212342	0.368045	0.999481	0.355636	0.400781
orf19.1795	C4_05370W_A	PUF3	0.441845	0.0643316	0.515538	0.7371	0.481947	0.128249
orf19.1948	C5_01220W_A	C5_01220W_A	0.441478	0.442658	-0.0750669	0.999481	0.576922	0.43131
orf19.4519	C2_04350C_A	SUV3	0.441337	0.0976332	0.00518832	0.999481	0.449782	0.202343
orf19.2746	C4_02550C_A	EMP70	0.441324	0.208145	0.177694	0.999481	0.323688	0.469584
orf19.3791	C4_04880W_A	FGR10	0.440432	0.296573	0.153169	0.999481	-0.0471033	0.948499
orf19.6568	C7_01580W_A	SMC6	0.440356	0.0425429	-0.0112665	0.999481	0.21598	0.374878
orf19.3563	C2_05330C_A	C2_05330C_A	0.440259	0.574773	0.523023	0.999481	0.768445	0.384391
orf19.1980	C5_00870C_A	GIT4	0.439298	0.597202	0.0164686	0.999481	-0.0671811	0.964754
orf19.3432.1	C6_01530C_A	C6_01530C_A	0.43908	0.11133	-0.0647886	0.999481	0.519264	0.174896
orf19.7504	CR_00290W_A	CR_00290W_A	0.438916	0.631592	0.633875	0.999481	-1.11315	0.34824
orf19.3066	C1_03680W_A	ENG1	0.438718	0.438108	0.0466264	0.999481	0.584106	0.428812
orf19.4102	C2_06150C_A	RPN10	0.438698	0.252166	0.0533877	0.999481	-0.218887	0.674966
orf19.6360	C1_12630C_A	C1_12630C_A	0.438461	0.25309	0.0578287	0.999481	0.468191	0.339138
orf19.5924	C3_04640W_A	ZCF31	0.438391	0.278357	-0.0121405	0.999481	0.146793	0.80114
orf19.7394	C3_06120C_A	GDA1	0.438292	0.103762	0.158352	0.999481	0.290727	0.38106
orf19.1228	C1_07680W_A	HAP2	0.438057	0.0555152	0.0605793	0.999481	1.01888	0.00416479
orf19.1124.2	C5_03700C_A	C5_03700C_A	0.437971	0.223614	0.19173	0.999481	-0.0156684	0.979713
orf19.2921	C4_06160W_A	C4_06160W_A	0.437752	0.115248	-0.00339214	0.999481	-0.255808	0.470837
orf19.3321	C1_01320W_A	MRS7	0.437156	0.0543435	0.265755	0.999481	-0.0632717	0.831944
orf19.5037	C4_03820C_A	HRQ2	0.43617	0.696562	0.451412	0.999481	0.0813795	0.965045
orf19.4640	C4_01450W_A	PWP1	0.435635	0.126081	0.113433	0.999481	0.368187	0.306485
orf19.4492	C2_04570W_A	C2_04570W_A	0.435083	0.220521	0.0833494	0.999481	0.417047	0.36655
orf19.5698	C5_00030W_A	C5_00030W_A	0.434627	0.0817918	0.121049	0.999481	0.23021	0.441426
orf19.1486	C2_01750C_A	C2_01750C_A	0.433802	0.515343	0.159428	0.999481	-0.565027	0.519108
orf19.2013	C2_01120W_A	KAR2	0.433656	0.0922696	0.211024	0.999481	-0.157948	0.622693
orf19.7516	CR_00190W_A	NGS1	0.433612	0.153209	-0.0912207	0.999481	0.347966	0.366044
orf19.6313	CR_04800W_A	MNT4	0.433406	0.320107	0.161239	0.999481	0.161304	0.790949
orf19.7662	CR_10730C_A	CR_10730C_A	0.432899	0.100611	-0.0611732	0.999481	0.421406	0.218834
orf19.6783	C3_07170C_A	C3_07170C_A	0.432654	0.155533	0.215373	0.999481	0.219625	0.570133
orf19.255	C3_02640C_A	ZCF1	0.432541	0.252787	0.389841	0.999481	0.0742688	0.899683
orf19.3582	C2_05520W_A	C2_05520W_A	0.432331	0.158455	-0.102743	0.999481	0.300292	0.437553
orf19.2901	C4_06350C_A	NUP60	0.431951	0.0716384	-0.0392476	0.999481	0.306999	0.291386
orf19.5752	C6_03780C_A	C6_03780C_A	0.431871	0.524578	0.244183	0.999481	-0.615456	0.485391
orf19.273	C3_02820C_A	C3_02820C_A	0.4316	0.04743	0.0870787	0.999481	0.0302304	0.922167
orf19.1382	C2_09700W_A	YEA4	0.431527	0.228868	0.124488	0.999481	0.40062	0.372984
orf19.4192	C6_00670W_A	CDC14	0.431296	0.381046	0.0366767	0.999481	0.484506	0.44143
orf19.425	C1_05400C_A	C1_05400C_A	0.431183	0.107869	0.0152535	0.999481	0.410454	0.228045
orf19.2250	C2_06960W_A	SPE3	0.430904	0.136426	0.31356	0.999481	-0.114142	0.775807
orf19.1426	C4_04240C_A	C4_04240C_A	0.430898	0.0496225	-0.010276	0.999481	0.175871	0.482101
orf19.372	C4_00060W_A	C4_00060W_A	0.430134	0.303098	-0.311689	0.999481	0.313726	0.583302
orf19.6696	C7_03630C_A	TIM9	0.429673	0.434484	0.619463	0.999481	-0.0915499	0.916583
orf19.5751	C6_03770C_A	ORM1	0.429582	0.355061	0.23873	0.999481	-0.321522	0.60397
orf19.1324	C4_03550W_A	RAD2	0.428737	0.0712037	-0.0216046	0.999481	-0.00606242	0.988169
orf19.3893	C5_04110W_A	SCW11	0.428497	0.0620058	-0.228622	0.999481	0.500129	0.122692
orf19.2600	CR_01990C_A	SPC98	0.428325	0.263028	-0.0064753	0.999481	0.321959	0.513732
orf19.3983	C5_04950C_A	C5_04950C_A	0.428236	0.120959	0.409229	0.999481	-0.124102	0.733538
orf19.6604	CR_09580C_A	CR_09580C_A	0.428154	0.148785	0.0795754	0.999481	0.111726	0.785332
orf19.6432	CR_08590W_A	CR_08590W_A	0.42802	0.1097	-0.170798	0.999481	0.238913	0.469933
orf19.1674	C3_01700W_A	CDC53	0.427739	0.0641065	-0.00265879	0.999481	0.231606	0.392842
orf19.6855	C1_04620W_A	C1_04620W_A	0.427393	0.0419682	-0.110799	0.999481	0.248152	0.29668
orf19.7598	CR_10230W_A	CR_10230W_A	0.427044	0.450591	-0.00972694	0.999481	-0.234815	0.775581
orf19.5181	C7_02800W_A	NIK1	0.426879	0.0391715	0.0150367	0.999481	0.0349265	0.899707
orf19.7531	CR_00090C_A	CR_00090C_A	0.426857	0.618664	-0.24166	0.999481	0.0284149	0.986048
orf19.2538	CR_01520W_A	PTC2	0.426827	0.0455475	0.114393	0.999481	0.249727	0.309422
orf19.3001	C1_03080C_A	TEM1	0.426426	0.299115	0.171413	0.999481	0.285571	0.58454
orf19.3161	C5_02070C_A	C5_02070C_A	0.426298	0.219293	-0.0339142	0.999481	0.328216	0.460977
orf19.2846	CR_02880W_A	CR_02880W_A	0.426289	0.168773	-0.178874	0.999481	-0.871199	0.0972836
orf19.3193	C5_01810W_A	FCR3	0.426259	0.122055	0.100858	0.999481	0.363385	0.290529
orf19.3042	C1_03410W_A	C1_03410W_A	0.426218	0.476152	0.0892314	0.999481	0.443541	0.552118
orf19.2268	C2_07130C_A	RCK2	0.425368	0.0472528	0.160815	0.999481	0.135819	0.583646
orf19.2183	C2_08000C_A	KRE30	0.425275	0.134808	0.0342653	0.999481	0.279553	0.430711
orf19.2498	C3_00940W_A	C3_00940W_A	0.425204	0.399337	0.0312854	0.999481	0.00583986	0.99478
orf19.2346	C1_10730W_A	C1_10730W_A	0.424454	0.628841	0.0397827	0.999481	-0.591111	0.610516
orf19.6685	C7_03530C_A	ISY1	0.423978	0.204607	0.269974	0.999481	0.110164	0.808054
orf19.445	C1_05210C_A	C1_05210C_A	0.422749	0.087611	0.23946	0.999481	0.511739	0.143106
orf19.3184	C5_01880C_A	C5_01880C_A	0.422413	0.566771	0.00083554	0.99972	-0.30724	0.775384
orf19.7353	C3_05720C_A	KIP3	0.422025	0.250609	0.103097	0.999481	0.283364	0.544794
orf19.1573	C2_02490C_A	C2_02490C_A	0.421888	0.106723	-0.0168986	0.999481	0.320153	0.327772
orf19.3885	CR_06310W_A	CR_06310W_A	0.421409	0.618215	0.579739	0.999481	-0.531346	0.617545
orf19.5633	C4_00100C_A	C4_00100C_A	0.421122	0.104663	0.153269	0.999481	-0.0445819	0.908785
orf19.4536	C1_01870C_A	CYS4	0.42105	0.0635171	-0.105002	0.999481	0.458576	0.144072
orf19.1993	C2_01320W_A	C2_01320W_A	0.420942	0.319824	0.0822361	0.999481	-0.0471224	0.949215
orf19.7523	CR_00120C_A	MKC1	0.420321	0.0657985	0.0815148	0.999481	-0.0793803	0.789472
orf19.6770	C3_07280C_A	C3_07280C_A	0.42012	0.396705	-0.340234	0.999481	0.527549	0.413747
orf19.3932	C5_04470C_A	C5_04470C_A	0.419825	0.57163	0.268374	0.999481	0.26339	0.792645
orf19.5799	C2_03020C_A	C2_03020C_A	0.419732	0.116133	0.142722	0.999481	0.500404	0.179819
orf19.3237	CR_01170W_A	CR_01170W_A	0.418773	0.292043	0.0662616	0.999481	-0.0805717	0.897185
orf19.1416	C4_04310W_A	COX11	0.418772	0.302261	0.61786	0.999481	-0.0958503	0.878272
orf19.1527	C2_02110C_A	C2_02110C_A	0.417703	0.312263	0.108116	0.999481	0.00475003	0.99478
orf19.3969	C5_04830W_A	SFL2	0.417062	0.312677	0.170372	0.999481	-0.248911	0.657912
orf19.7564	CR_09900C_A	DPB2	0.416993	0.173258	-0.0755166	0.999481	0.207681	0.602322
orf19.1822	C1_06280C_A	UME6	0.416509	0.784261	1.13385	0.999481	-2.91052	0.198118
tG(GCC)6	CR_08750C_A	tG(GCC)6	0.416478	0.800599	0.643922	0.999481	0.183141	0.940174
orf19.5034	C1_13960W_A	YBP1	0.416317	0.219826	-0.142151	0.999481	0.359314	0.409992
orf19.158	C3_01150C_A	C3_01150C_A	0.416238	0.189249	-0.00515645	0.999481	0.640383	0.165888
orf19.4045	C5_05470W_A	EST1	0.41601	0.206849	-0.166057	0.999481	0.344357	0.412781
orf19.3912	C5_04280C_A	GLN3	0.415222	0.192897	0.0575291	0.999481	-0.00557387	0.990928
orf19.5015	C1_13780W_A	MYO2	0.415196	0.0396073	0.0993579	0.999481	0.116338	0.610175
orf19.6787	C3_07130W_A	C3_07130W_A	0.414687	0.200629	0.188562	0.999481	0.297286	0.468338
orf19.350	C3_03520C_A	PRE9	0.41449	0.316713	0.00874858	0.999481	-0.00244048	0.997134
orf19.7670	CR_10800C_A	CR_10800C_A	0.413517	0.130255	0.0496785	0.999481	0.256986	0.447694
orf19.3695	C7_02690C_A	C7_02690C_A	0.413249	0.189195	0.153222	0.999481	0.387286	0.336231
orf19.3480	C6_02370C_A	C6_02370C_A	0.412535	0.138508	0.185829	0.999481	0.544714	0.174006
snR57b	CR_06220C_A	CR_06220C_A	0.412315	0.636556	0.638595	0.999481	-0.0404981	0.976414
orf19.1825	C1_06250W_A	C1_06250W_A	0.411938	0.312523	-0.0360725	0.999481	0.292481	0.585808
orf19.2602	CR_02020C_A	OPT1	0.411757	0.505248	-0.123104	0.999481	-0.413862	0.616055
orf19.6437	CR_08630W_A	CDC23	0.411262	0.129976	-0.0248262	0.999481	0.170142	0.622407
orf19.6517	C7_02020W_A	RAD14	0.410839	0.38896	0.000536373	0.99972	-0.334541	0.609318
orf19.6414	CR_08450C_A	CR_08450C_A	0.410695	0.0509301	-0.13948	0.999481	0.308998	0.227196
orf19.6326	C6_00110C_A	C6_00110C_A	0.410467	0.368038	-0.150548	0.999481	0.545293	0.359042
orf19.6007	C3_05280C_A	C3_05280C_A	0.410076	0.229858	0.594829	0.999481	0.259358	0.551581
orf19.1458	C2_01510C_A	C2_01510C_A	0.409394	0.235779	-0.180312	0.999481	0.649187	0.190179
orf19.1255	C4_05700W_A	ZCF5	0.409087	0.423207	0.47254	0.999481	-1.45119	0.0972836
orf19.3622	C2_08570W_A	ANP1	0.409033	0.133899	0.0597548	0.999481	0.290548	0.388783
orf19.6584	C7_01450C_A	PRT1	0.408344	0.0488405	-0.0237538	0.999481	0.343714	0.192653
orf19.2796	C1_07490C_A	C1_07490C_A	0.408008	0.184397	-0.033174	0.999481	0.0670577	0.885362
orf19.3160	C5_02080C_A	HSP12	0.407994	0.523863	-0.253051	0.999481	0.353563	0.692581
orf19.1032	C1_03770W_A	SKO1	0.407759	0.407862	0.354479	0.999481	0.4207	0.498002
orf19.3851	CR_06020W_A	CR_06020W_A	0.40734	0.391672	0.568135	0.999481	0.292596	0.610154
orf19.2778	C1_07660W_A	C1_07660W_A	0.406921	0.604035	0.474576	0.999481	0.709697	0.426115
orf19.6009	C1_00960C_A	SET1	0.406693	0.103704	0.0236236	0.999481	0.291674	0.345619
orf19.2789	C1_07560W_A	C1_07560W_A	0.406412	0.252371	0.180515	0.999481	0.218264	0.632981
tF(GAA)1	C3_02730C_A	tF(GAA)1	0.405744	0.704202	0.95477	0.999481	0.688719	0.550278
orf19.3055	C1_03530W_A	MED17	0.40539	0.154503	-0.0834393	0.999481	0.282812	0.429983
orf19.2336	C1_10810W_A	C1_10810W_A	0.404652	0.501601	-0.633466	0.999481	-0.13966	0.892685
orf19.1496	C2_01870C_A	C2_01870C_A	0.404197	0.220303	-0.0883878	0.999481	0.390389	0.359305
snR44d	C3_05820W_A	C3_05820W_A	0.403923	0.355061	0.15093	0.999481	0.383711	0.480337
orf19.2653	C5_03260C_A	C5_03260C_A	0.403903	0.301697	0.314456	0.999481	-0.243595	0.635985
orf19.2318.1	C1_10960W_A	C1_10960W_A	0.403902	0.0884729	0.0857072	0.999481	0.287097	0.316612
orf19.733	CR_07160C_A	CR_07160C_A	0.403827	0.684983	-0.745189	0.999481	-0.22622	0.892685
orf19.5856	C3_04120C_A	C3_04120C_A	0.403778	0.213052	0.0402263	0.999481	-0.00487853	0.99177
orf19.7605	CR_10300W_A	PUP1	0.40377	0.381014	0.0389369	0.999481	-0.235331	0.718263
orf19.943	C5_00460C_A	FET33	0.403694	0.181178	-0.0372786	0.999481	0.28475	0.452351
orf19.6847	C1_04530C_A	C1_04530C_A	0.402553	0.142746	-0.105545	0.999481	0.134658	0.723033
orf19.3541	C2_05100C_A	ERF1	0.402385	0.168867	0.119899	0.999481	0.391746	0.300028
orf19.4261	C5_02490C_A	TIF5	0.402252	0.0624409	0.0744123	0.999481	0.275783	0.287826
orf19.825	C2_03990W_A	GCD7	0.401905	0.131816	-0.139384	0.999481	0.228779	0.49093
orf19.2363	CR_07020W_A	CR_07020W_A	0.401718	0.145516	0.107777	0.999481	0.207505	0.550807
snR40	C5_03450W_A	C5_03450W_A	0.401566	0.521761	0.231814	0.999481	0.487049	0.526185
orf19.6049	C1_00570C_A	C1_00570C_A	0.401485	0.116397	0.12199	0.999481	-0.0312686	0.940174
orf19.7263	C1_14450C_A	C1_14450C_A	0.401426	0.171025	-0.107009	0.999481	0.093216	0.823195
orf19.685.1	C6_01940W_A	C6_01940W_A	0.400373	0.689352	0.443627	0.999481	-0.524306	0.687494
NA	NA	ENSRNA049499404	0.40018	0.562651	0.793992	0.999481	-0.274971	0.761934
orf19.2049	C2_00750W_A	C2_00750W_A	0.399886	0.570338	0.0933441	0.999481	0.049284	0.968647
orf19.4199	C6_00590W_A	SLY41	0.399717	0.124755	0.109074	0.999481	0.396232	0.229931
orf19.1975	C5_00920W_A	C5_00920W_A	0.39904	0.252787	-0.122208	0.999481	0.404734	0.372984
orf19.1429	C4_04210C_A	SOH1	0.39893	0.112782	0.147837	0.999481	-0.0559649	0.879018
orf19.6885	C2_05740W_A	SPO7	0.398682	0.246607	0.0397575	0.999481	0.32761	0.453546
orf19.4670	C4_01190W_A	CAS5	0.398082	0.0819982	0.0806926	0.999481	0.168043	0.539487
orf19.3714	CR_07850W_A	CR_07850W_A	0.397922	0.0914794	0.0511471	0.999481	0.151671	0.602527
orf19.6558	C7_01660C_A	C7_01660C_A	0.397742	0.190527	-0.117943	0.999481	0.32031	0.405178
orf19.1150	C1_11690W_A	C1_11690W_A	0.397274	0.326496	0.443513	0.999481	-0.369971	0.46823
orf19.5669	C4_00410W_A	C4_00410W_A	0.397267	0.103244	0.191924	0.999481	-0.00556627	0.989855
orf19.1494	C2_01850W_A	RAD23	0.397166	0.0835595	-0.0106701	0.999481	0.107011	0.724318
orf19.3340	C1_01520C_A	SOD2	0.397056	0.336113	0.104296	0.999481	-0.767277	0.198118
orf19.1084	C6_04270W_A	CDC39	0.396989	0.046671	0.0622118	0.999481	0.188379	0.404588
orf19.5595	C6_03100W_A	SHE3	0.396471	0.0399897	0.210282	0.999481	-0.0867065	0.705974
orf19.3414	C6_01720C_A	SUR7	0.395941	0.218797	0.267798	0.999481	0.2185	0.607836
orf19.86	C6_00850W_A	C6_00850W_A	0.395856	0.556513	-0.0630994	0.999481	-0.0967345	0.930604
orf19.1163	C1_11560C_A	C1_11560C_A	0.39579	0.160175	-0.00461475	0.999481	0.319865	0.364929
orf19.4324	C5_02990W_A	C5_02990W_A	0.395103	0.313698	0.657715	0.999481	0.060582	0.916583
orf19.3048	C1_03460C_A	C1_03460C_A	0.394298	0.487358	-0.0176864	0.999481	0.314442	0.68118
orf19.2643	C5_03360W_A	RPO26	0.394094	0.110768	0.118485	0.999481	0.111342	0.735851
orf19.5138	C7_03170W_A	IFA21	0.393105	0.465193	0.0877581	0.999481	0.689749	0.302491
orf19.3438	C6_01460C_A	C6_01460C_A	0.392725	0.0930324	0.2173	0.999481	-0.0100972	0.978524
orf19.6458	C7_02520W_A	C7_02520W_A	0.392724	0.492712	0.375839	0.999481	-0.223902	0.779858
snR189a	C1_06490C_A	C1_06490C_A	0.392507	0.73979	1.07027	0.999481	0.174933	0.912487
orf19.6296	C5_01620C_A	VPS22	0.392132	0.456538	0.0629814	0.999481	0.133167	0.868356
orf19.6569	C7_01570C_A	C7_01570C_A	0.391702	0.296573	-0.310936	0.999481	0.0168063	0.981321
orf19.7518	CR_00170W_A	ZCF38	0.390908	0.528221	-0.141036	0.999481	0.165423	0.861032
orf19.4118	C2_06020W_A	CNT	0.390801	0.249711	-0.282602	0.999481	0.579772	0.218834
orf19.4283	C5_02660C_A	C5_02660C_A	0.390531	0.1314	-0.0226484	0.999481	0.314202	0.338225
orf19.2541	CR_01550C_A	CR_01550C_A	0.390369	0.20213	-0.177346	0.999481	0.402639	0.312515
orf19.6403	CR_08350W_A	CR_08350W_A	0.389957	0.258782	0.155688	0.999481	-0.175411	0.719522
orf19.3921	C5_04350C_A	C5_04350C_A	0.389944	0.116656	-0.209216	0.999481	0.0219016	0.959315
orf19.6371	CR_08110W_A	CR_08110W_A	0.389612	0.391448	-0.0697859	0.999481	0.245386	0.699538
orf19.1896	C2_07380W_A	SSC1	0.389122	0.266755	0.195016	0.999481	0.28585	0.532062
orf19.802	C2_04190C_A	UGA1	0.388564	0.391182	0.217896	0.999481	-0.1281	0.848823
orf19.424	C1_05410C_A	TRP99	0.388422	0.301123	0.050303	0.999481	-0.037218	0.954619
orf19.5686	C5_00100C_A	C5_00100C_A	0.386815	0.518097	0.383244	0.999481	-0.403943	0.606352
orf19.5292	C4_04170C_A	AXL2	0.386474	0.266605	0.162169	0.999481	0.240016	0.60083
orf19.4477	C1_04020C_A	CSH1	0.386309	0.354788	0.461441	0.999481	-0.469112	0.384391
orf19.4240	C5_02320C_A	C5_02320C_A	0.386031	0.368038	-0.101064	0.999481	0.392163	0.478449
orf19.4251	C5_02430W_A	ZCF22	0.385339	0.366626	0.12106	0.999481	0.136263	0.823929
orf19.4772	C1_09140C_A	SSU81	0.385179	0.191917	0.155987	0.999481	-0.14397	0.72504
orf19.441	C1_05240C_A	RPT1	0.384289	0.369041	0.0481316	0.999481	-0.139505	0.823377
orf19.5380	C3_00750W_A	LYS144	0.383895	0.0930653	0.00103313	0.99972	0.14687	0.60397
orf19.5081	C1_08090C_A	FUN12	0.383807	0.0934934	-0.0418396	0.999481	0.0522102	0.874634
orf19.5440	C3_00290W_A	RPT2	0.383685	0.378939	0.0210183	0.999481	-0.184176	0.769397
orf19.231	C3_02430W_A	APL2	0.383513	0.076905	0.0446479	0.999481	-0.0189635	0.957287
orf19.3799	C4_04800W_A	C4_04800W_A	0.383349	0.222669	0.0914272	0.999481	-0.0493969	0.923067
orf19.1270	C4_05840W_A	FRE3	0.382604	0.729049	0.705486	0.999481	-0.199716	0.894835
orf19.1259	C4_05740C_A	C4_05740C_A	0.382568	0.0432693	0.168779	0.999481	0.218611	0.310089
orf19.3564	C2_05340C_A	RPC40	0.382425	0.114406	0.00990415	0.999481	0.230731	0.440564
orf19.5967	C3_04990W_A	FGR44	0.380978	0.232884	-0.181721	0.999481	0.256836	0.534399
orf19.2851	CR_02940C_A	CR_02940C_A	0.380969	0.324876	-0.108104	0.999481	-0.131247	0.823929
orf19.5260	C1_12050W_A	RPN2	0.380852	0.25672	-0.0307929	0.999481	-0.0434507	0.940115
orf19.789.1	C4_03930C_A	C4_03930C_A	0.380544	0.101586	-0.097856	0.999481	0.295435	0.306136
orf19.5107	C1_08300W_A	NOT5	0.380489	0.0517001	-0.0258072	0.999481	0.23584	0.302491
orf19.6438	CR_08640C_A	CR_08640C_A	0.380356	0.0635171	0.205696	0.999481	0.00957275	0.976509
orf19.1648	C3_02000W_A	RAD50	0.380265	0.119025	0.013397	0.999481	-0.00898644	0.983697
orf19.3396	C6_01860C_A	HCH1	0.379798	0.222289	0.0139395	0.999481	0.105437	0.813452
orf19.4847	C1_09820C_A	C1_09820C_A	0.379242	0.466201	-0.287441	0.999481	-0.318875	0.678015
orf19.7320	CR_09220C_A	LIP7	0.379064	0.682494	0.0877532	0.999481	-0.851393	0.478731
orf19.5702	C6_03430C_A	C6_03430C_A	0.378884	0.086927	-0.0438321	0.999481	0.0293129	0.932279
orf19.1844	CR_06870C_A	CR_06870C_A	0.378535	0.695643	0.335865	0.999481	-0.721629	0.551581
orf19.1933	C5_01350W_A	C5_01350W_A	0.378423	0.128336	0.170374	0.999481	0.312763	0.307227
orf19.5869	C3_04260W_A	C3_04260W_A	0.377586	0.298978	0.32178	0.999481	0.155629	0.754861
orf19.4522	C1_02030C_A	C1_02030C_A	0.377519	0.357605	-0.0882107	0.999481	-0.31315	0.585808
orf19.1192	C6_00320C_A	DNA2	0.377498	0.0838168	-0.0573509	0.999481	0.112231	0.688017
orf19.1417	C4_04300C_A	C4_04300C_A	0.377172	0.387632	0.364332	0.999481	-0.390976	0.485699
orf19.6913	C7_01330C_A	GCN2	0.377088	0.106299	-0.0400221	0.999481	0.307611	0.290038
orf19.6407	CR_08410W_A	CR_08410W_A	0.376976	0.095531	-0.0207962	0.999481	-0.0101613	0.978453
orf19.5276	C1_11910W_A	C1_11910W_A	0.376626	0.186141	-0.188329	0.999481	0.310877	0.393872
orf19.3794	C4_04850C_A	CSR1	0.376404	0.630245	-0.0297055	0.999481	-0.464981	0.670132
orf19.746	C4_05160C_A	C4_05160C_A	0.376349	0.150796	0.132477	0.999481	0.235862	0.466266
orf19.6744	C3_07450C_A	C3_07450C_A	0.376285	0.316559	-0.0663203	0.999481	0.411777	0.393469
orf19.6724	C3_07640C_A	FUM12	0.375977	0.631541	0.597359	0.999481	-0.381711	0.724318
orf19.6726	C3_07630C_A	C3_07630C_A	0.375976	0.173824	0.195336	0.999481	-0.17882	0.617545
orf19.1441	C2_01370C_A	C2_01370C_A	0.375622	0.164803	-0.0160871	0.999481	0.485504	0.198118
orf19.470	CR_03910C_A	CR_03910C_A	0.375162	0.177136	-0.0153145	0.999481	0.290321	0.404463
orf19.1493	C2_01840C_A	RAD7	0.374725	0.26784	-0.0386085	0.999481	0.278477	0.526338
orf19.4362	CR_03640C_A	CR_03640C_A	0.373831	0.151175	0.250738	0.999481	-0.0477605	0.903678
orf19.4284	C5_02670W_A	BUR2	0.373315	0.172998	-0.0967574	0.999481	0.111153	0.775384
orf19.4443	C1_07240W_A	YPD1	0.373065	0.155106	0.0625274	0.999481	0.0806629	0.827371
orf19.6899	C7_01170C_A	C7_01170C_A	0.372943	0.719772	0.29124	0.999481	0.568985	0.640722
orf19.7655	CR_10680W_A	RPO21	0.372928	0.108876	-0.0670354	0.999481	0.182374	0.526185
orf19.7355	C3_05740C_A	SSN8	0.372447	0.125414	0.0667694	0.999481	0.345309	0.256557
orf19.5887	C3_04400C_A	NUP85	0.372317	0.222669	-0.10968	0.999481	0.42572	0.289676
orf19.2111	C2_00220C_A	C2_00220C_A	0.372316	0.141638	0.0274124	0.999481	0.0288521	0.945319
orf19.2476	C1_05750C_A	C1_05750C_A	0.371972	0.0505349	-0.107469	0.999481	0.174589	0.426211
orf19.1555	C2_02350C_A	SAC3	0.371771	0.0531007	-0.0295149	0.999481	0.298027	0.212209
orf19.3603	C2_08730W_A	MFG1	0.371725	0.108876	0.079484	0.999481	0.20806	0.463452
orf19.1576	C2_02520W_A	C2_02520W_A	0.371708	0.259317	0.0388786	0.999481	-0.230508	0.602647
orf19.5864	C3_04220C_A	URK1	0.370691	0.101249	-0.136666	0.999481	0.179943	0.518883
orf19.4426	C1_07420C_A	PEX3	0.369697	0.138928	0.268811	0.999481	0.0640672	0.85673
orf19.1170	C1_11500C_A	ARO7	0.369395	0.0833896	0.104084	0.999481	0.145824	0.571529
orf19.6456	C7_02540W_A	C7_02540W_A	0.369349	0.124668	0.350117	0.999481	0.0632932	0.845327
orf19.4593	C4_02000C_A	RGA2	0.368978	0.134808	0.242325	0.999481	0.152713	0.627847
orf19.3964	C5_04780W_A	ASH2	0.368757	0.395535	-0.115174	0.999481	0.511943	0.36655
orf19.920	C5_00680W_A	RMT2	0.36831	0.167038	-0.0249009	0.999481	0.150359	0.670132
orf19.4093	C2_09320C_A	PES1	0.367585	0.194792	0.171691	0.999481	0.273387	0.450494
orf19.2463	C1_05860W_A	PRN2	0.367421	0.562755	0.0586634	0.999481	-0.458596	0.599361
orf19.1794	C4_05360C_A	C4_05360C_A	0.36739	0.213205	-0.131866	0.999481	0.806025	0.0783118
orf19.4956	C1_13300C_A	RPN1	0.367325	0.265034	-0.00513119	0.999481	0.0923289	0.850831
orf19.2429	C1_06160W_A	C1_06160W_A	0.366664	0.721824	-0.118341	0.999481	0.0290282	0.987702
orf19.1199	C6_00370C_A	NOP5	0.366522	0.134786	0.0387469	0.999481	0.214089	0.483114
orf19.2788	C1_07570C_A	C1_07570C_A	0.366255	0.314821	0.113739	0.999481	0.203538	0.678015
orf19.3126	C4_06830C_A	CCT6	0.366215	0.0934484	0.00473847	0.999481	0.0238602	0.945733
orf19.7583	CR_10070C_A	ZCF39	0.366048	0.441884	-0.289725	0.999481	0.336418	0.597423
orf19.3331	C1_01450W_A	ABC1	0.365953	0.223957	0.27696	0.999481	-0.0436541	0.9305
orf19.4668	C4_01220C_A	C4_01220C_A	0.36592	0.658678	0.51485	0.999481	0.405374	0.681372
orf19.7369	C3_05890W_A	TRM12	0.365852	0.223633	-0.0290292	0.999481	0.142272	0.73434
orf19.1310	C4_03680C_A	C4_03680C_A	0.365077	0.161748	0.0384789	0.999481	0.0771153	0.834617
orf19.1405	C2_09490W_A	PHO13	0.364983	0.198897	0.0519943	0.999481	-0.0663012	0.878272
orf19.2062	C2_00660C_A	SOD4	0.364936	0.788448	2.47713	0.851119	4.35577	0.00137762
orf19.4904	C1_10330C_A	C1_10330C_A	0.364709	0.149895	0.0223564	0.999481	0.456442	0.190179
orf19.5132	C7_03230C_A	C7_03230C_A	0.364279	0.25494	0.264068	0.999481	0.219719	0.584135
orf19.2885	C4_06490C_A	PRI2	0.3629	0.354204	0.0954058	0.999481	0.280146	0.578089
orf19.1704	C3_01460C_A	FOX3	0.362464	0.559166	0.852259	0.999481	-1.46154	0.128042
orf19.6020	C1_00860W_A	C1_00860W_A	0.362235	0.476152	0.137751	0.999481	-0.070368	0.934573
orf19.5357	C2_10750C_A	AKL1	0.362028	0.293366	0.0580279	0.999481	-0.272979	0.544592
orf19.1755	C2_10250C_A	SET2	0.361833	0.146224	-0.0588105	0.999481	0.337373	0.28981
orf19.1279	C5_04100W_A	CDS1	0.361216	0.256966	0.167939	0.999481	0.0595756	0.905428
orf19.4430	C1_07390W_A	C1_07390W_A	0.361133	0.456272	0.147311	0.999481	-0.289222	0.661553
snR55	CR_06200C_A	CR_06200C_A	0.36094	0.59054	0.274169	0.999481	0.828128	0.295515
orf19.7548	CR_09760W_A	MED21	0.360573	0.303098	0.0667403	0.999481	0.251504	0.579578
orf19.5960	C3_04910C_A	NCE102	0.360487	0.12427	0.289316	0.999481	0.172478	0.556265
orf19.3102	C4_07070W_A	CTA6	0.360318	0.111657	0.1893	0.999481	0.171223	0.526357
orf19.717	CR_06490C_A	HSP60	0.360177	0.335832	0.2898	0.999481	0.335974	0.492261
orf19.1369	C2_09810C_A	C2_09810C_A	0.359603	0.683567	0.547204	0.999481	-0.771994	0.473194
orf19.7175	C7_04050W_A	HLJ1	0.359298	0.114432	0.0158016	0.999481	-0.0195064	0.960085
orf19.6476	C7_02350C_A	C7_02350C_A	0.359287	0.111657	0.0894019	0.999481	0.0499266	0.879321
orf19.2516	C3_01140W_A	C3_01140W_A	0.359027	0.160645	0.147921	0.999481	0.714068	0.0638516
orf19.1666	C3_01800C_A	C3_01800C_A	0.358946	0.183861	-0.0127898	0.999481	0.0291679	0.949215
orf19.4157	C4_00830W_A	SPS20	0.358799	0.278174	0.191273	0.999481	0.117629	0.798585
orf19.2017	C2_01070W_A	C2_01070W_A	0.358782	0.185561	0.0253388	0.999481	0.204487	0.551581
orf19.7012	C7_01020C_A	C7_01020C_A	0.357836	0.222289	0.274173	0.999481	0.508929	0.202343
orf19.2695	C4_02970C_A	UBR1	0.357775	0.076905	-0.106439	0.999481	0.269018	0.277833
orf19.482	CR_04000W_A	RPT4	0.357505	0.34766	0.00315229	0.999481	-0.0476575	0.942263
orf19.4464	C1_03900W_A	SEN15	0.357213	0.346858	0.0310558	0.999481	0.277886	0.573358
orf19.7664	CR_10750C_A	CR_10750C_A	0.356375	0.173824	-0.0315257	0.999481	0.12355	0.7311
orf19.4646	C4_01400W_A	UEC1	0.356037	0.215424	0.108879	0.999481	0.228532	0.526185
orf19.3895	C5_04130C_A	CHT2	0.355875	0.20974	0.414741	0.999481	0.121353	0.764665
orf19.6861	C4_05220C_A	C4_05220C_A	0.355571	0.306271	0.106549	0.999481	0.345232	0.429751
orf19.3291	C1_01030W_A	HMT1	0.355335	0.144277	0.0341372	0.999481	0.194544	0.526185
orf19.2238	C2_06860W_A	LTE1	0.355244	0.395535	0.159559	0.999481	0.157863	0.790949
orf19.714	CR_06520C_A	CR_06520C_A	0.355225	0.206849	0.0553729	0.999481	0.117938	0.765112
orf19.6399	CR_08320W_A	ATS1	0.354612	0.323785	-0.0518687	0.999481	0.71847	0.170436
NA	NA	ENSRNA049499374	0.35417	0.348668	0.0403898	0.999481	0.466516	0.337316
orf19.4242	C5_02340C_A	CST20	0.354077	0.109543	0.207772	0.999481	0.123686	0.662761
orf19.5942	C3_04790W_A	C3_04790W_A	0.353181	0.441884	0.151741	0.999481	-0.189515	0.775384
orf19.3482	C6_02410W_A	C6_02410W_A	0.352554	0.280569	-0.0848948	0.999481	0.214825	0.622248
orf19.4702	C4_00920C_A	C4_00920C_A	0.352544	0.414642	-0.103717	0.999481	0.27477	0.635587
orf19.4051	C5_05490C_A	HTS1	0.352485	0.2348	-0.0786723	0.999481	0.225544	0.55982
orf19.7374	C3_05930W_A	CTA4	0.352081	0.416061	-0.442782	0.999481	0.508053	0.373194
orf19.5241	C1_12230W_A	SNT1	0.352055	0.284735	-0.103967	0.999481	0.276899	0.519912
orf19.3593	C2_08780W_A	RPT6	0.351448	0.378299	-0.0838818	0.999481	-0.0257002	0.970473
orf19.2889	C4_06450W_A	C4_06450W_A	0.351194	0.213963	-0.0756787	0.999481	0.0497947	0.913856
orf19.1265	C4_05790W_A	C4_05790W_A	0.35048	0.10084	-0.0662349	0.999481	0.392834	0.183496
orf19.7366	C3_05860C_A	C3_05860C_A	0.350175	0.363036	0.0519742	0.999481	0.3195	0.518466
orf19.1834	C1_10630C_A	C1_10630C_A	0.350144	0.222289	-0.136517	0.999481	-0.00342428	0.99478
orf19.1678	C3_01660W_A	C3_01660W_A	0.349195	0.194387	0.140833	0.999481	0.31387	0.348399
orf19.1768	C2_10130W_A	C2_10130W_A	0.349107	0.203941	0.0789184	0.999481	-0.189626	0.602878
orf19.1956	C5_01140C_A	C5_01140C_A	0.348957	0.217061	0.326868	0.999481	0.321916	0.377195
orf19.928	C5_00610C_A	C5_00610C_A	0.348712	0.116346	0.0258807	0.999481	0.0501968	0.878131
orf19.2886	C4_06480C_A	CEK1	0.348533	0.239318	0.165966	0.999481	0.0731103	0.870904
orf19.5083	C1_08100W_A	DRG1	0.348236	0.168041	-0.051721	0.999481	0.197443	0.535357
orf19.2343	C1_10760W_A	VPS23	0.348143	0.211244	-0.100825	0.999481	0.0988764	0.803685
orf19.6336	C6_00070C_A	PGA25	0.347857	0.545938	0.214282	0.999481	-0.215783	0.789149
orf19.6013	C1_00910W_A	C1_00910W_A	0.347773	0.604863	0.460734	0.999481	0.410053	0.60083
orf19.7645	CR_10620C_A	CR_10620C_A	0.347587	0.35003	-0.00585506	0.999481	0.239859	0.627847
orf19.5930	C3_04700W_A	C3_04700W_A	0.347318	0.308912	0.190944	0.999481	0.0531436	0.92207
orf19.3114	C4_06950W_A	C4_06950W_A	0.346358	0.518205	0.0461035	0.999481	0.302062	0.669542
orf19.5531	C6_02610C_A	CDC37	0.345995	0.274438	-0.015011	0.999481	-0.0112161	0.984902
orf19.2214	C2_07680W_A	C2_07680W_A	0.345688	0.199456	0.222719	0.999481	0.39182	0.261454
orf19.3859	CR_06070W_A	CR_06070W_A	0.345512	0.21578	0.0993778	0.999481	0.305127	0.392581
orf19.1306	C4_03720C_A	C4_03720C_A	0.345498	0.651722	-0.233278	0.999481	-0.458812	0.648751
orf19.3103	C4_07060W_A	C4_07060W_A	0.344764	0.111021	-0.0262263	0.999481	0.338196	0.228725
orf19.6100	C1_00100C_A	C1_00100C_A	0.344207	0.109795	-0.0258758	0.999481	0.034187	0.917239
orf19.640	CR_05140W_A	CR_05140W_A	0.344191	0.214074	0.253792	0.999481	0.00306748	0.99478
orf19.6624	CR_05900W_A	CR_05900W_A	0.344176	0.240601	0.276913	0.999481	-0.15702	0.688386
orf19.2067	C2_00600C_A	C2_00600C_A	0.343728	0.519424	0.175487	0.999481	-1.29273	0.127719
orf19.3345	C1_01560W_A	SIZ1	0.343625	0.134808	-0.0850458	0.999481	0.182788	0.526185
orf19.5506	C7_03710C_A	PLC1	0.342878	0.171289	0.0259971	0.999481	0.00478891	0.990928
orf19.3062	C1_03630W_A	C1_03630W_A	0.342283	0.186202	-0.0233267	0.999481	0.222122	0.494909
orf19.2230	C2_06790W_A	C2_06790W_A	0.342141	0.419004	0.0854631	0.999481	-0.0550404	0.939754
orf19.6099	C1_00110W_A	CCT8	0.341979	0.12268	-0.0826827	0.999481	0.0599745	0.850216
orf19.7101	C7_00210C_A	C7_00210C_A	0.341833	0.162206	-0.147955	0.999481	0.107185	0.754895
orf19.1491	C2_01820C_A	C2_01820C_A	0.341828	0.121913	-0.0263518	0.999481	0.270066	0.327772
orf19.4553	C6_04140C_A	C6_04140C_A	0.341472	0.187782	0.345897	0.999481	-0.324656	0.328622
orf19.5441	C3_00280C_A	ULP3	0.341242	0.181584	-0.189329	0.999481	0.346759	0.295515
orf19.4577	C4_02150C_A	C4_02150C_A	0.341026	0.477676	-0.0983053	0.999481	-0.142706	0.846562
orf19.782	C1_04640W_A	C1_04640W_A	0.340929	0.662058	0.419657	0.999481	-0.710165	0.467619
orf19.7421	C3_06360C_A	CYP5	0.340271	0.271547	-0.115576	0.999481	0.112604	0.800099
orf19.1842	CR_06910W_A	BUD5	0.340118	0.233247	0.0338775	0.999481	0.680946	0.119228
orf19.3031	C1_03340C_A	SEC62	0.339995	0.0645877	0.251018	0.999481	0.120808	0.580884
orf19.3585	C2_08840W_A	C2_08840W_A	0.339823	0.266117	-0.042421	0.999481	0.156735	0.71445
orf19.7210	C1_14030W_A	C1_14030W_A	0.339659	0.645018	-0.244586	0.999481	0.0225724	0.987051
orf19.1440.1	C4_03310C_A	C4_03310C_A	0.339227	0.688146	-0.659128	0.999481	0.769552	0.478875
NA	NA	ENSRNA049499113	0.338775	0.437893	0.171686	0.999481	0.678277	0.227333
orf19.6272	C1_06390W_A	C1_06390W_A	0.338697	0.569001	0.20642	0.999481	-0.313595	0.700199
orf19.3282	CR_00740C_A	BMT3	0.338442	0.797919	0.703401	0.999481	-0.750238	0.628022
orf19.7034	C7_00830C_A	C7_00830C_A	0.338142	0.0973169	0.0311406	0.999481	0.0648626	0.814598
orf19.6807	C3_06940W_A	C3_06940W_A	0.3377	0.589138	-0.01678	0.999481	-0.969596	0.276287
orf19.7193	C7_03890C_A	C7_03890C_A	0.337236	0.20974	0.051499	0.999481	0.108005	0.778223
orf19.5194.1	C1_04430C_A	C1_04430C_A	0.337198	0.31803	-0.0733737	0.999481	-0.191805	0.687077
orf19.4945	C1_13170C_A	MSH6	0.336238	0.337328	-0.00562652	0.999481	0.119521	0.814256
orf19.4776	C1_09180W_A	LYS143	0.335433	0.432311	0.144863	0.999481	-0.0943888	0.885362
orf19.1636	C3_02100W_A	STE50	0.335385	0.20269	-0.150055	0.999481	0.232113	0.492994
orf19.1618	C3_02280C_A	GFA1	0.33531	0.217218	0.143381	0.999481	-0.112658	0.772839
orf19.713	CR_06530W_A	CR_06530W_A	0.334194	0.258782	-0.0365839	0.999481	0.106663	0.80114
orf19.707	CR_06730W_A	APG7	0.334028	0.636848	0.362456	0.999481	-0.683026	0.447629
orf19.5215	C2_05950C_A	TES15	0.333725	0.707708	0.518609	0.999481	-1.68206	0.198118
orf19.3054	C1_03520W_A	RPN3	0.333109	0.399114	0.0241773	0.999481	-0.0876015	0.886241
orf19.6319	C6_00170C_A	C6_00170C_A	0.332315	0.121999	-0.156188	0.999481	0.0843439	0.775581
orf19.5425	C3_00420W_A	C3_00420W_A	0.332026	0.0922696	0.0315196	0.999481	0.408769	0.143876
orf19.3423	C6_01630W_A	TIF3	0.331782	0.10471	0.0342558	0.999481	0.266199	0.299612
orf19.6186	C3_07900C_A	C3_07900C_A	0.331753	0.201306	-0.265839	0.999481	0.285679	0.394679
orf19.5064	C1_07910C_A	MRPL3	0.331601	0.221168	0.235562	0.999481	0.70617	0.0977151
orf19.3353	C1_01630W_A	C1_01630W_A	0.331397	0.279667	0.44895	0.999481	-0.144769	0.736114
orf19.1762	C2_10190C_A	OCA1	0.331377	0.100094	0.256054	0.999481	-0.0192331	0.953017
orf19.3241	CR_01130W_A	CR_01130W_A	0.331235	0.106723	0.0100941	0.999481	0.00577988	0.987343
orf19.1770	C2_10110W_A	CYC1	0.331191	0.337328	0.340284	0.999481	-0.634093	0.198783
orf19.5364	C2_10810W_A	C2_10810W_A	0.331004	0.199334	-0.172332	0.999481	0.0587017	0.882848
orf19.2043	C2_00810C_A	C2_00810C_A	0.330971	0.271964	-0.0839901	0.999481	0.239869	0.538447
orf19.4498	C2_04520C_A	C2_04520C_A	0.330738	0.399257	-0.192375	0.999481	0.398146	0.438998
orf19.1637	C3_02090C_A	C3_02090C_A	0.330694	0.393546	-0.379538	0.999481	0.173685	0.760164
orf19.3203	C5_01720C_A	RCY1	0.330355	0.188527	-0.177686	0.999481	0.407666	0.226853
orf19.6341	C1_12810W_A	C1_12810W_A	0.330278	0.497768	0.227848	0.999481	-0.458249	0.468338
orf19.7625	CR_10480W_A	PGA1	0.329932	0.49062	0.345445	0.999481	0.678258	0.251904
orf19.7391	C3_06090C_A	OCH1	0.329922	0.103762	0.206993	0.999481	0.0728851	0.788605
orf19.6688	C7_03560W_A	C7_03560W_A	0.328745	0.761634	0.0835868	0.999481	-1.16447	0.410427
orf19.1119	C5_03760C_A	MTR10	0.328556	0.12231	-0.13621	0.999481	0.29018	0.281051
orf19.5963	C3_04940W_A	C3_04940W_A	0.327528	0.582246	0.36657	0.999481	-0.274632	0.7341
orf19.1153	C1_11660W_A	GAD1	0.327349	0.383031	0.213514	0.999481	0.385713	0.430615
orf19.8	CR_07110C_A	CR_07110C_A	0.32681	0.457216	0.110556	0.999481	0.554618	0.31467
orf19.4079	C2_09170W_A	SLP2	0.32663	0.24351	-0.107211	0.999481	0.0899695	0.825649
SNRNAU4	C4_06180C_A	C4_06180C_A	0.326337	0.740368	-0.105356	0.999481	0.780765	0.509956
orf19.4792	C1_09320C_A	C1_09320C_A	0.326166	0.675057	-0.0578085	0.999481	0.16342	0.886498
orf19.5200	C1_04380W_A	SIT4	0.325887	0.221168	0.240426	0.999481	-0.0677769	0.866579
orf19.6271	C1_06400C_A	C1_06400C_A	0.325882	0.134773	0.0103016	0.999481	0.308025	0.268634
orf19.518	CR_04300W_A	CR_04300W_A	0.325681	0.133747	0.0727706	0.999481	0.263793	0.339518
orf19.442	C1_05250W_A	C1_05250W_A	0.325203	0.423809	-0.0945134	0.999481	-0.477591	0.392842
orf19.469	CR_03900W_A	HST7	0.32503	0.135374	-0.0591575	0.999481	0.0443762	0.891751
orf19.6883	C2_05720C_A	C2_05720C_A	0.324926	0.156256	-0.0254301	0.999481	-0.047801	0.889475
orf19.4325	C5_03000C_A	C5_03000C_A	0.324825	0.399257	0.112765	0.999481	0.471615	0.342377
orf19.185	C2_04790C_A	C2_04790C_A	0.324643	0.259339	0.21499	0.999481	0.326111	0.380211
orf19.5544	C6_02730W_A	SAC6	0.324569	0.369425	-0.022461	0.999481	0.184511	0.720194
orf19.6582	C7_01470C_A	PRE10	0.324157	0.477212	0.110117	0.999481	-0.139215	0.835006
orf19.1323	C4_03560W_A	C4_03560W_A	0.323644	0.170027	0.0562159	0.999481	0.0123037	0.976144
orf19.177	C1_06320W_A	C1_06320W_A	0.323577	0.638319	0.484699	0.999481	0.203509	0.814598
orf19.5671	C4_00420C_A	C4_00420C_A	0.323477	0.278206	-0.125132	0.999481	0.307428	0.429695
orf19.5832	C2_02740C_A	HPT1	0.323454	0.26784	-0.0617854	0.999481	0.479517	0.229872
orf19.4033	C5_05370C_A	PRP22	0.323266	0.104123	-0.148725	0.999481	-0.0242224	0.940496
orf19.5830	C2_02760W_A	LHS1	0.321862	0.110316	0.249396	0.999481	-0.0941255	0.728131
orf19.5834	C2_02720W_A	C2_02720W_A	0.320565	0.191777	-0.0139568	0.999481	0.306842	0.336398
orf19.5793	C2_03060W_A	PR26	0.320196	0.476927	0.0684929	0.999481	-0.103449	0.882532
orf19.3980	C5_04920C_A	C5_04920C_A	0.319097	0.376855	-0.0706884	0.999481	-0.0712167	0.900368
orf19.4213	C6_00460C_A	FET3	0.3189	0.213224	-0.0518725	0.999481	-0.0381814	0.929327
orf19.6273	C1_06380C_A	C1_06380C_A	0.318847	0.243368	-0.080508	0.999481	0.353714	0.321924
orf19.1402	C2_09520C_A	CCT2	0.318802	0.187494	-0.0839644	0.999481	0.0751565	0.827766
orf19.4988	C1_13560W_A	C1_13560W_A	0.317987	0.337394	0.0478175	0.999481	0.251766	0.551433
orf19.2233	C2_06820C_A	PRE2	0.317813	0.402792	0.0705804	0.999481	-0.0830291	0.888365
orf19.2459	C1_05900W_A	C1_05900W_A	0.317384	0.20934	0.371354	0.999481	-0.0158989	0.970093
orf19.4017	C5_05240C_A	C5_05240C_A	0.317226	0.668579	0.489493	0.999481	0.31691	0.733008
orf19.5056	C1_07850C_A	C1_07850C_A	0.31708	0.2002	0.0329775	0.999481	0.0260418	0.950773
orf19.3214	C5_03970W_A	C5_03970W_A	0.316563	0.25266	-0.0876637	0.999481	-0.0697694	0.87258
orf19.5040	C4_03850W_A	C4_03850W_A	0.316534	0.273477	-0.101519	0.999481	0.366051	0.337589
orf19.1659	C3_01880W_A	ALG8	0.316512	0.157357	0.133577	0.999481	0.217346	0.430177
orf19.3349	C1_01590C_A	C1_01590C_A	0.31645	0.0831732	-0.00355395	0.999481	0.10776	0.633407
orf19.4829	C1_09660W_A	DOA1	0.315873	0.494294	-0.0834373	0.999481	-0.183225	0.782833
orf19.6933	C3_03830W_A	C3_03830W_A	0.315585	0.245888	0.0333916	0.999481	-0.159046	0.669542
snR77b	C4_01630C_A	C4_01630C_A	0.315139	0.487303	-0.292305	0.999481	0.784188	0.212798
orf19.1647	C3_02010C_A	C3_02010C_A	0.31487	0.549349	-0.701746	0.999481	0.46934	0.513732
orf19.7487	CR_00470W_A	CR_00470W_A	0.313497	0.649753	-0.309133	0.999481	-0.23485	0.820554
orf19.4511	C2_04410W_A	C2_04410W_A	0.313344	0.225301	0.0961278	0.999481	0.161046	0.630478
orf19.1186	C6_00270W_A	C6_00270W_A	0.312765	0.213297	0.0790213	0.999481	0.156728	0.63338
orf19.3449	C6_01350W_A	C6_01350W_A	0.31265	0.20057	-0.0552553	0.999481	0.292211	0.353845
orf19.6155	C3_00830C_A	C3_00830C_A	0.312584	0.321385	0.0522164	0.999481	-0.023695	0.967874
orf19.544.1	CR_04550W_A	PRE6	0.312068	0.412128	0.0454307	0.999481	-0.176912	0.742614
orf19.4571	C4_02190C_A	C4_02190C_A	0.311977	0.629758	-0.264717	0.999481	-0.166295	0.869629
orf19.2040	C2_00840W_A	C2_00840W_A	0.311502	0.151209	-0.133307	0.999481	0.254382	0.355502
orf19.1041	C1_04090C_A	C1_04090C_A	0.311368	0.192089	0.069062	0.999481	0.280472	0.351094
orf19.1738.1	CR_04650W_A	CR_04650W_A	0.310073	0.212413	0.0473745	0.999481	-0.0493219	0.898025
orf19.6317	CR_04740C_A	ADE6	0.30972	0.423809	-0.281469	0.999481	0.282222	0.581118
orf19.4609	C4_01840C_A	C4_01840C_A	0.309622	0.31803	0.0103141	0.999481	-0.244094	0.547674
orf19.1525	C2_02090W_A	C2_02090W_A	0.30937	0.136716	0.283926	0.999481	0.127078	0.627579
orf19.7534	CR_00080W_A	MIS12	0.309229	0.506409	-0.0613498	0.999481	0.40673	0.498326
orf19.4888	C1_10190W_A	C1_10190W_A	0.30905	0.216988	0.212909	0.999481	0.0124309	0.977187
orf19.909	C2_03220C_A	STP4	0.309038	0.666146	-0.290842	0.999481	0.33224	0.73175
orf19.6778	C3_07230W_A	C3_07230W_A	0.308969	0.0688874	0.180829	0.999481	0.0837093	0.695851
snR5b	C1_06300W_A	C1_06300W_A	0.308917	0.768222	1.18237	0.999481	-0.646688	0.582811
orf19.4235	C5_02290W_A	PDE1	0.308676	0.497768	0.0857965	0.999481	0.632341	0.267539
orf19.828	C2_03950W_A	C2_03950W_A	0.308333	0.284701	0.236419	0.999481	0.57895	0.174707
orf19.5839	C2_02680W_A	PDR17	0.308247	0.148785	-0.0269858	0.999481	0.109705	0.703589
orf19.530	CR_04410W_A	CR_04410W_A	0.308085	0.302377	0.0566536	0.999481	0.01735	0.974003
orf19.7264	C1_14460W_A	C1_14460W_A	0.308056	0.357382	-0.0467092	0.999481	-0.0941898	0.850892
orf19.6665	C5_03550W_A	C5_03550W_A	0.307725	0.353593	-0.150247	0.999481	0.303558	0.481197
orf19.866	C2_03540W_A	RAD32	0.307711	0.409534	0.58116	0.999481	0.150618	0.77926
orf19.4510	C2_04420W_A	IFA4	0.307476	0.44529	-0.155583	0.999481	-0.00927592	0.990285
orf19.7426	C3_06410C_A	C3_06410C_A	0.307137	0.236932	0.153168	0.999481	0.235024	0.469655
orf19.4232	C5_02260C_A	PTH1	0.306287	0.150568	0.132916	0.999481	0.160978	0.539487
orf19.3409	C6_01760W_A	SEC12	0.306221	0.269663	0.0394486	0.999481	0.0279638	0.953593
orf19.1679	C3_01640C_A	C3_01640C_A	0.305895	0.823458	1.25661	0.999481	-0.608674	0.692284
orf19.4628	C4_01650C_A	C4_01650C_A	0.30544	0.229964	-0.215133	0.999481	0.106846	0.773265
orf19.726	CR_06420W_A	PPZ1	0.304773	0.156451	0.0515484	0.999481	0.319838	0.251737
orf19.6340	C1_12820C_A	C1_12820C_A	0.304279	0.229848	0.0164018	0.999481	0.400388	0.241576
orf19.6511	C7_02060W_A	LIG1	0.303895	0.30921	-0.291695	0.999481	0.324158	0.405232
orf19.2770.1	C4_02320C_A	SOD1	0.303744	0.227228	-3.32765	3.88996e-05	3.83019	3.82341e-06
orf19.5931	C3_04710W_A	ARV1	0.303682	0.340712	0.100281	0.999481	-0.0567624	0.911283
TER1	CR_05370W_A	CR_05370W_A	0.303094	0.376977	0.488447	0.999481	0.54603	0.205673
orf19.7105	C7_00180W_A	FAR1	0.30249	0.600966	0.0895062	0.999481	0.376548	0.605577
orf19.5197	C1_04400C_A	APE2	0.302375	0.231511	-0.221675	0.999481	0.252381	0.438998
orf19.3461	C6_02210W_A	C6_02210W_A	0.302094	0.728336	0.238982	0.999481	1.80471	0.104533
orf19.5827	C2_02780C_A	BUB2	0.301959	0.313593	-0.0735052	0.999481	0.302589	0.433686
orf19.7511	CR_00230W_A	CR_00230W_A	0.301857	0.186601	-0.0701683	0.999481	0.307999	0.29668
orf19.3944	C5_04600C_A	GRR1	0.301247	0.278174	-0.255072	0.999481	0.123112	0.75639
snR43b	C2_03580W_A	C2_03580W_A	0.300796	0.589112	-0.139953	0.999481	0.512324	0.465475
orf19.4400	CR_03560W_A	CR_03560W_A	0.300514	0.303098	-0.0362279	0.999481	0.137691	0.738073
orf19.4779	C1_09210C_A	C1_09210C_A	0.299808	0.557336	0.210716	0.999481	-0.303215	0.65567
orf19.6676	C5_03640W_A	C5_03640W_A	0.29951	0.265907	0.0685977	0.999481	0.191419	0.581056
orf19.4446	C1_07210C_A	C1_07210C_A	0.298961	0.134617	0.0944945	0.999481	0.0345657	0.909648
orf19.3133	C4_06760W_A	GUT2	0.298902	0.237001	-0.066206	0.999481	0.30029	0.363492
orf19.6090	C1_00160C_A	C1_00160C_A	0.298066	0.292043	0.0716435	0.999481	0.227125	0.537259
orf19.2926	C1_02390W_A	C1_02390W_A	0.29733	0.297305	-0.0487355	0.999481	0.09197	0.825578
orf19.864	C2_03550C_A	C2_03550C_A	0.297028	0.185741	-0.182258	0.999481	0.211911	0.456682
orf19.3960	C5_04740C_A	HYS2	0.296645	0.214906	-0.131772	0.999481	0.192718	0.531418
orf19.1217	C6_04060W_A	C6_04060W_A	0.296491	0.193866	-0.21358	0.999481	0.332806	0.266422
orf19.2103	C2_00310W_A	C2_00310W_A	0.296004	0.666146	0.00431456	0.999657	-0.191455	0.847961
orf19.4244	C5_02360C_A	C5_02360C_A	0.295843	0.586487	0.0935234	0.999481	0.245259	0.735221
orf19.1473	C2_01630W_A	C2_01630W_A	0.294978	0.753648	0.221141	0.999481	0.26525	0.823987
orf19.2919	C4_06190C_A	MPH1	0.29483	0.167294	0.0477859	0.999481	-0.0345705	0.917479
orf19.2093	C2_00380C_A	RFA1	0.294747	0.289683	-0.0174346	0.999481	-0.0420844	0.928567
orf19.4265	C5_02530W_A	UAP1	0.294524	0.13919	0.141869	0.999481	0.22768	0.363183
orf19.6782	C3_07180C_A	BMT1	0.294182	0.132006	0.52347	0.447992	0.479845	0.0977151
orf19.2727	C4_02710C_A	GRX3	0.294097	0.20213	-0.0847827	0.999481	0.356506	0.247115
orf19.102	C6_01000C_A	C6_01000C_A	0.293974	0.155743	0.0742492	0.999481	0.13818	0.60083
orf19.4861.1	C1_09940W_A	C1_09940W_A	0.293816	0.638617	0.563672	0.999481	-0.720773	0.354499
orf19.115	C6_01090C_A	C6_01090C_A	0.293358	0.49676	0.164337	0.999481	0.167433	0.779609
orf19.606	CR_07920W_A	CR_07920W_A	0.292611	0.265617	0.288834	0.999481	0.105851	0.775581
orf19.2402	CR_03210C_A	SSU72	0.292513	0.324279	-0.0424738	0.999481	0.109868	0.796669
orf19.7036	C7_00810W_A	C7_00810W_A	0.292369	0.249061	0.270899	0.999481	0.13424	0.699538
snR8b	C2_06560W_A	C2_06560W_A	0.291687	0.562239	0.103167	0.999481	0.63049	0.308027
orf19.1973	C5_00940C_A	HAP5	0.291462	0.461046	-0.0678827	0.999481	0.30502	0.551581
orf19.5542	C6_02710C_A	SAP6	0.291374	0.662058	-0.333537	0.999481	0.383398	0.667931
orf19.1406	C2_09480W_A	C2_09480W_A	0.291297	0.599768	0.223635	0.999481	-0.0914464	0.915561
orf19.1336	C7_03390C_A	PUP3	0.291293	0.493	0.094596	0.999481	-0.15974	0.792204
orf19.5413	C3_00500C_A	C3_00500C_A	0.291039	0.222545	-0.129844	0.999481	0.0465952	0.903105
orf19.2755	C4_02470C_A	C4_02470C_A	0.289723	0.450591	0.165717	0.999481	-0.175061	0.748838
orf19.1864	C2_07610C_A	C2_07610C_A	0.28944	0.492811	0.0136701	0.999481	-0.189588	0.751365
orf19.4290	C5_02710W_A	TRR1	0.289356	0.455561	0.0628769	0.999481	1.7904	0.00938674
orf19.2310	C1_11050W_A	C1_11050W_A	0.28925	0.55414	0.0416836	0.999481	-0.207798	0.766368
orf19.4029	C5_05340W_A	C5_05340W_A	0.287994	0.229345	0.000619597	0.99972	0.201983	0.515681
orf19.7343	CR_09480W_A	CR_09480W_A	0.28793	0.160645	0.066851	0.999481	0.311251	0.242093
orf19.2823	CR_02640W_A	RFG1	0.287482	0.381727	0.0183315	0.999481	0.777357	0.127357
orf19.1303	C4_03750C_A	C4_03750C_A	0.287316	0.311658	0.125162	0.999481	-0.0183228	0.970093
orf19.4718	C4_06110C_A	TRP5	0.286753	0.405673	-0.194302	0.999481	0.382627	0.392917
orf19.3826	C4_04560C_A	C4_04560C_A	0.286549	0.457914	0.418291	0.999481	0.029096	0.965718
orf19.325	C3_03260W_A	C3_03260W_A	0.286344	0.14449	0.0679549	0.999481	0.151832	0.535724
orf19.6674	C5_03620W_A	BTS1	0.286024	0.647601	-0.0443372	0.999481	-0.144168	0.879128
orf19.1816	CR_07070C_A	ALS3	0.285899	0.190347	-0.0516467	0.999481	0.693203	0.044438
orf19.2760	C4_02430W_A	C4_02430W_A	0.285547	0.11244	0.0238126	0.999481	0.224183	0.321462
orf19.3936	C5_04510W_A	GDE1	0.285334	0.156928	0.034927	0.999481	0.187494	0.455004
orf19.5657	C4_00300C_A	SWI1	0.285251	0.258861	-0.123314	0.999481	0.195037	0.551581
orf19.5274	C1_11930W_A	C1_11930W_A	0.285191	0.231881	0.129605	0.999481	0.177058	0.567796
orf19.6991	C3_05560W_A	PRE3	0.2851	0.512931	0.0358821	0.999481	-0.223904	0.713537
orf19.947	C5_00420C_A	MRP17	0.284876	0.195485	0.0470611	0.999481	0.363173	0.220895
orf19.3963	C5_04770W_A	C5_04770W_A	0.284859	0.266117	0.188206	0.999481	-0.101185	0.779858
orf19.498	CR_04140W_A	CR_04140W_A	0.284742	0.15916	0.0552576	0.999481	0.363207	0.198118
orf19.7414	C3_06190C_A	ALS6	0.284361	0.423958	0.333981	0.999481	-0.24342	0.597569
orf19.4987	C1_13550C_A	NUP49	0.284045	0.180573	0.0659335	0.999481	0.130959	0.633548
orf19.5381	C3_00730W_A	C3_00730W_A	0.283947	0.183607	0.0310415	0.999481	0.133152	0.631479
orf19.5796	C2_03050W_A	SHE9	0.283473	0.555978	0.331497	0.999481	-0.309526	0.620262
orf19.5269	C1_11970C_A	C1_11970C_A	0.283454	0.292043	0.0603121	0.999481	-0.111926	0.774947
orf19.7081	C7_00390W_A	SPL1	0.282006	0.328155	0.174889	0.999481	-0.0188791	0.970093
orf19.2606	CR_02050C_A	HDA1	0.280541	0.296635	-0.0380393	0.999481	0.447994	0.226529
orf19.4808	C1_09450C_A	NUP188	0.280478	0.30921	-0.128107	0.999481	0.444273	0.240225
orf19.2274	C2_07180W_A	C2_07180W_A	0.280217	0.381169	0.158522	0.999481	0.044902	0.931341
orf19.2296	C1_11200W_A	C1_11200W_A	0.280071	0.551407	-0.0334259	0.999481	0.23912	0.714293
orf19.3447	C6_01370W_A	C6_01370W_A	0.280026	0.388446	0.0304112	0.999481	-0.107231	0.820554
orf19.5378	C3_00770C_A	SCL1	0.279895	0.484379	-0.0202746	0.999481	-0.153892	0.788535
orf19.7609	CR_10330W_A	PGA11	0.279854	0.678261	-0.0177931	0.999481	0.0511753	0.965107
orf19.4145	C5_01500C_A	ZCF20	0.27966	0.435817	-0.0124589	0.999481	0.727674	0.165444
orf19.7160	C7_04140C_A	C7_04140C_A	0.279113	0.289434	0.0523235	0.999481	0.15493	0.663769
orf19.409	C1_08610C_A	C1_08610C_A	0.278899	0.621198	0.713821	0.999481	-0.331942	0.656196
orf19.4603	C4_01890C_A	ARL1	0.278282	0.20057	0.00800436	0.999481	0.0214578	0.953601
orf19.4207	C6_00520W_A	C6_00520W_A	0.278209	0.479151	0.00801612	0.999481	0.0609111	0.925424
orf19.1991	C2_01340W_A	C2_01340W_A	0.278105	0.162161	0.0436704	0.999481	0.135176	0.600596
orf19.6658	C5_03490C_A	C5_03490C_A	0.278054	0.710817	-0.0111938	0.999481	0.517955	0.576663
orf19.4002	C5_05100C_A	DUN1	0.277625	0.286161	0.101236	0.999481	0.214196	0.523468
orf19.4583	C4_02080W_A	C4_02080W_A	0.277514	0.48435	0.482135	0.999481	-0.392774	0.428172
orf19.7064	C7_00550C_A	GLN4	0.277113	0.123368	-0.0178822	0.999481	0.207199	0.358162
orf19.4533	C1_01900C_A	C1_01900C_A	0.275803	0.387478	-0.0766901	0.999481	-0.11118	0.810896
orf19.1760	C2_10210C_A	RAS1	0.275171	0.238808	0.318305	0.999481	-0.13362	0.674971
orf19.6404	CR_08370W_A	GSH2	0.27422	0.141584	-0.0219048	0.999481	0.0460774	0.867687
orf19.4153	C5_01590W_A	C5_01590W_A	0.27416	0.23728	-0.118673	0.999481	0.208012	0.487316
orf19.459	CR_05950C_A	ADP1	0.273995	0.495031	0.203741	0.999481	-0.104022	0.864575
orf19.2521	CR_01380W_A	CR_01380W_A	0.273743	0.211834	-0.147847	0.999481	0.302557	0.291371
orf19.5299	C4_04100C_A	ECM1	0.273273	0.445631	-0.0813248	0.999481	0.349613	0.449443
orf19.6851	C1_04570C_A	CHL4	0.273115	0.691621	-0.0380785	0.999481	0.696799	0.39206
orf19.3706	CR_07780W_A	CR_07780W_A	0.273075	0.475543	0.17386	0.999481	0.249772	0.622127
orf19.6508	C7_02090C_A	C7_02090C_A	0.272807	0.456892	0.00066344	0.99972	-0.0161464	0.980138
orf19.2857	CR_02970C_A	CR_02970C_A	0.272549	0.181584	-0.0490965	0.999481	0.105443	0.705234
orf19.2964	C1_02750C_A	C1_02750C_A	0.272543	0.264658	-0.00257509	0.999481	0.212392	0.5025
orf19.7182	C7_03990C_A	C7_03990C_A	0.272483	0.228516	-0.0303973	0.999481	0.20003	0.49093
orf19.748	C4_05180C_A	C4_05180C_A	0.272195	0.222419	-0.0675181	0.999481	0.374852	0.220989
orf19.6199	C1_07050C_A	C1_07050C_A	0.272118	0.228991	-0.193426	0.999481	0.00292041	0.99459
orf19.2399	CR_03240C_A	CR_03240C_A	0.27173	0.190015	-0.0576055	0.999481	0.106114	0.710002
orf19.5486	C2_06230W_A	C2_06230W_A	0.271698	0.159971	-0.0754438	0.999481	0.0860715	0.746282
orf19.7261	C1_14440C_A	GDI1	0.271123	0.325091	0.00677952	0.999481	-0.0956739	0.81083
orf19.2748	C4_02530W_A	ARG83	0.270984	0.476705	0.369248	0.999481	-0.145857	0.779858
orf19.1146	C1_11720W_A	C1_11720W_A	0.270971	0.507334	0.255745	0.999481	0.290074	0.560009
orf19.3108	C4_07010C_A	C4_07010C_A	0.270718	0.485226	0.0592621	0.999481	0.342081	0.479897
orf19.4799	C1_09370W_A	CEF1	0.270242	0.223906	-0.00398161	0.999481	0.17702	0.534399
orf19.254	C3_02630C_A	C3_02630C_A	0.270135	0.63791	0.542538	0.999481	0.00311032	0.997134
orf19.6032	C1_00740C_A	SPE1	0.269864	0.191203	0.0970384	0.999481	0.317517	0.249026
orf19.7453	C3_06640W_A	C3_06640W_A	0.269817	0.323875	-0.183206	0.999481	0.0343078	0.944198
orf19.4622	C4_01720C_A	C4_01720C_A	0.269647	0.265519	0.220167	0.999481	0.202034	0.522859
orf19.4375	CR_03760W_A	CR_03760W_A	0.269416	0.450591	-0.176664	0.999481	0.306312	0.513282
orf19.5322	C2_10470C_A	C2_10470C_A	0.269191	0.214074	0.0881675	0.999481	0.11084	0.710684
orf19.2887	C4_06470W_A	C4_06470W_A	0.269133	0.209331	0.0217368	0.999481	0.335695	0.238235
orf19.4954	C1_13280C_A	C1_13280C_A	0.268882	0.407684	0.179008	0.999481	0.417893	0.331121
orf19.5052	C1_07820W_A	C1_07820W_A	0.268652	0.258963	0.289434	0.999481	0.0899933	0.782077
orf19.6753	C3_07380W_A	C3_07380W_A	0.268536	0.659005	0.00899618	0.999481	-0.151104	0.867188
orf19.7520	CR_00150C_A	POT1	0.268156	0.767697	0.858202	0.999481	-1.68246	0.185533
orf19.1945	C5_01240W_A	AUR1	0.268046	0.446131	0.058199	0.999481	0.30642	0.498326
orf19.4721	C1_08630W_A	C1_08630W_A	0.267724	0.388809	0.353877	0.999481	0.39681	0.317365
orf19.1497	C2_01880C_A	ZCF6	0.267532	0.335438	-0.0214227	0.999481	0.17549	0.63338
orf19.2288	C2_07310W_A	CCT5	0.267151	0.23272	-0.0825846	0.999481	0.0595274	0.860955
[truncated: 3,943 more rows]
